# Supplementary material for: Reproductie zouttoestand getijrivieren (XVIII): Verandering in zoutpenetratie bij middenstandsverhoging en verandering van vertikaal getij op zee
Source: Royal Society of Chemistry journal article supplement (doi:10.1039/c0ob00422g), 1973-02-01
Supplement: c0ob00422g.pdf [file c0ob00422g.pdf]

Electronic Supplementary Information for:

**Circular Dichroism, Optical Rotation and Absolute Configuration of 2-Cyclohexenone-*cis*-diol Type Phenol Metabolites: Redefining the Role of Substituents and 2-Cyclohexenone Conformation in Electronic Circular Dichroism Spectra**

Marcin Kwit, Jacek Gawronski, Derek R. Boyd, Narain D. Sharma and Magdalena Kaik

Total energies ( $E_{tot}$ , in Hartree), relative energies ( $\Delta E$ ,  $\Delta G$  in kcal mol<sup>-1</sup>), percentage populations, cartesian coordinates and structures as well as UV and CD spectra of individual conformers of keto-*cis*-diols **1a-1e**, **2a-2c**, **3a-3c** calculated at the various levels of theory are available on request (165 pages) from the authors.

Full version of **Figure 5**.

Experimental details

**Table A1.** Relative energies and populations of the stable low-energy conformers of **1-4** calculated at various levels of theory.

**Table A2.** Relative energies and populations of the stable low-energy conformers of **1a**, **1b** and **1e** calculated at PCM(MeCN)/MP2/Aug-cc-pVTZ//PCM(MeCN)/MP2/6-311G(d,p) level of theory.

**Table B1.** Structural parameters that characterize low-energy conformers of **1-4** calculated at the PCM(MeCN)/B3LYP/6-311++G(2d,2p) level.

**Table B2.** Values of intraring torsion angles that characterize the low-energy conformers of **1-4** calculated at the PCM(MeCN)/B3LYP/6-311++G(2d,2p) level.

**Table B3.** Structural parameters that characterize low-energy conformers of **1a**, **1b** and **1c** calculated at the PCM(MeCN)/MP2/6-311G(d,p) level.

**Table B4.** Values of intra-ring torsion angles that characterize the low-energy conformers of **1a**, **1b** and **1c** calculated at the PCM(MeCN)/MP2/6-311G(d,p) level.

**Table C.** Specific optical rotations for *cis*-ketodiols **1-4**, measured in methanol solution and calculated at the PCM/B3LYP/Aug-cc-pVTZ level.

**Table D.** Rotatory strengths and excitation energies calculated at the PCM/B2LYP/6-311++G(2d,2p) level for *P*-type conformers of model compounds **4-23** with varying torsion angles  $\omega$  and  $\tau$ .

**Table E.** Relative energies ( $\Delta E$ ) of **4** with varying torsion angles  $\omega$  and  $\tau$ .

**Table F.** Rotatory strengths  $R$  calculated at the PCM/B2LYP/6-311++G(2d,2p) level for *P*-type conformers of model compounds **4-23** with planar chromophore relative to **4** and substituent contributions  $\Delta R$  for Cotton effects I-III.

**Table G.** Specific optical rotations for enones **6-11**, measured and calculated at the PCM/B3LYP/Aug-cc-pVTZ level.

**Figure A.** Relative energies of (*P*)-**4** (in kcal mol<sup>-1</sup>, calculated at the B3LYP/6-311++G(2d,2p) level) as a function of dihedral angles  $\omega$  and  $\tau$ .

**Figure B.** UV spectra of *cis*-ketodiols **1a-1e**, experimental (in acetonitrile solutions, solid lines) and  $\Delta E_{MP2}$  Boltzmann averaged calculated at PCM/B2LYP/Aug-cc-pVTZ level (dashed lines) (left column) and UV spectra of *cis*-ketodiols *ent*-**2a-2c** experimental (in acetonitrile solutions, solid lines),  $\Delta E_{MP2}$  Boltzmann averaged calculated at PCM/B2LYP/Aug-cc-pVTZ level for **2a-2c** (dashed lines) and **3a-3c** (dash-dot-dot lines) (right column). All calculated spectra were wavelength corrected to match experimental short-wavelength UV  $\lambda_{max}$  at ca. 220 nm.

**Figure B1.** ECD spectra calculated at the PCM/B2LYP/Aug-cc-pVTZ level for individual conformers of **1a**, optimized at the PCM/MP2/6-311G(d,p) level (red lines) and at the PCM/B3LYP/6-311++G(2d,2p) level (blue lines).

**Figure B2.** ECD spectra calculated at the PCM/B2LYP/Aug-cc-pVTZ level for individual

conformers of **1b**, optimized at the PCM/MP2/6-311G(d,p) level (red lines) and at the PCM/B3LYP/6-311++G(2d,2p) level (blue lines).

**Figure B3.** ECD spectra calculated at the PCM/B2LYP/Aug-cc-pVTZ level for individual conformers of **1e**, optimized at the PCM/MP2/6-311G(d,p) level (red lines) and at the PCM/B3LYP/6-311++G(2d,2p) level (blue lines).

**Figure B4.** ECD spectra of *cis*-ketodiol **1a**, **1b** and **1e** calculated at the PCM/B2LYP/Aug-cc-pVTZ level and  $\Delta E_{MP2}$  Boltzmann averaged. Geometries were optimized at the PCM/MP2/Aug-cc-pVTZ//PCM/MP2/6-311G(d,p) level (red lines) and at the PCM/MP2/Aug-cc-pVTZ//PCM/B3LYP/6-311++G(2d,2p) level. Wavelength not corrected.

**Figure C.** Effect of percentage populations of the lowest-energy *P* and *M* conformers on averaged ECD spectra of **1e**. ECD spectra were calculated at PCM/B2LYP/Aug-cc-pVTZ level.

**Figure D.** Effect of methyl and hydroxy substituents on the CD spectra of selected monosubstituted (*P*)-2-cyclohexenones with a planar chromophore ( $\omega = 180^\circ$ ,  $\tau = 0^\circ$ ). All spectra were calculated at the PCM/B2LYP/Aug-cc-pVTZ level for the structures optimized at the PCM/B3LYP/6-311++G(2d,2p) level. Inserts show long wavelength (ca. 300 nm)  $n_{C=O}-\pi_{C=O}^*$  Cotton effects. Wavelength not corrected.

**Figure E.** Effect of non-planarity of the chromophore ( $\omega$  and  $\tau$  angles) on the rotatory strengths *R* for the three low-energy electronic transitions, calculated conformers of acrolein. All rotatory strengths were calculated at the PCM/B2LYP/6-311++G(2d,2p) level.

**Figure F.** Effect of non-planarity of the chromophore ( $\omega$  and  $\tau$  angles) on the rotatory strengths *R* for the three low-energy electronic transitions, calculated for *P*-type conformers of **4**. All rotatory strengths were calculated at the PCM/B2LYP/6-311++G(2d,2p) level.

**Figure G.** Calculated contribution of the C4-C5-C6 chain to the rotatory strengths of 2-cyclohexenone obtained by subtraction of rotatory strengths calculated for acrolein (Figure D) from those obtained for **4** (Figure E). All rotatory strengths were calculated at the PCM/B2LYP/6-311++G(2d,2p) level.

**Figure H.** Effect of the twist of  $\omega$  and  $\tau$  angles on the CD spectra of *P*-type conformer of **5** calculated at PCM/B2LYP/6-311++G(2d,2p) level. Vertical bars represent rotatory strengths. Wavelength not corrected.

**Figure I.** Effect of deviation from planarity (angles  $\omega$  and  $\tau$ ) on the rotatory strengths *R* for the three low-energy electronic transitions, calculated for *P*-type conformers of (4*S*)-**7**. All rotatory strengths were calculated at the PCM/B2LYP/6-311++G(2d,2p) level.

**Figure J.** Effect of methyl and hydroxy substituents on the CD spectra of selected disubstituted 2-cyclohexenone *P*-type conformers with planar chromophore moieties. All spectra were calculated at the PCM/B2LYP/6-311++G(2d,2p) level. Inserts show the long wavelength (> 300 nm)  $n-\pi^*$  Cotton effects. Wavelength not corrected.

**Figure K.** Effect of methods used for calculations of ECD and for Boltzmann averaging on the shapes of the CD spectra of **1a**.



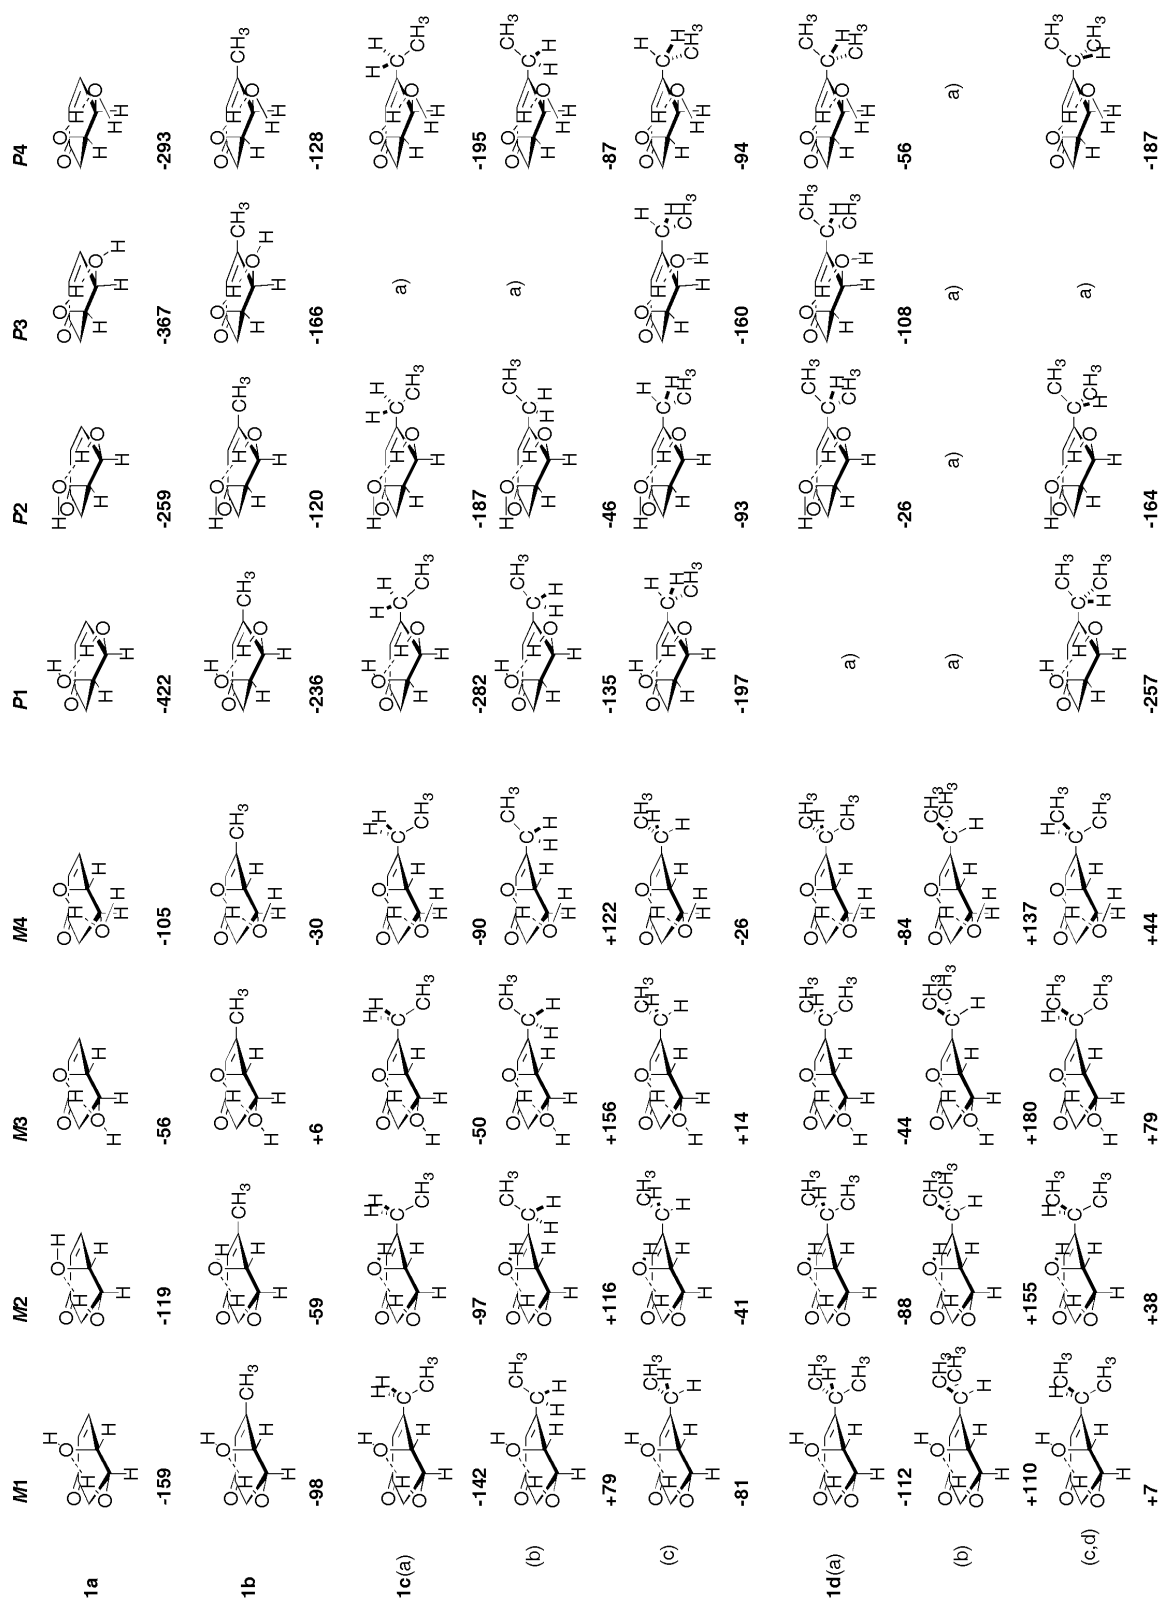

a) conformer not found at the PCM/B3LYP/6-311++G(2d,2p) level

## Experimental details

The bacterial biotransformations of the corresponding phenols using *Pseudomonas putida* UV4 to yield the 2-cyclohexenone metabolites **1a-1e** and **2a-2c** and their full characterization is reported elsewhere.<sup>[1,2]</sup> For optical rotation ( $[\alpha]_D$ ) measurements (*ca* 20 °C,  $10^{-1}$  deg cm<sup>2</sup> g<sup>-1</sup>) a Perkin-Elmer 214 polarimeter and methanol solvent were used.

## Computational details

Starting geometries of keto-*cis*-diols **1-3** were obtained by optimisation at the B3LYP/6-311++G(d,p)<sup>[3]</sup> level of theory. From these geometries, for both *P* and *M* helicity enones, relaxed potential energy surfaces (PES) were obtained by changing the dihedral angles of H-C4-O-H, H-C5-O-H and, if necessary, of C2=C3-CH<sub>2</sub>-CH<sub>3</sub> and C2=C3-C(Me)<sub>2</sub>-H in the range 0 to 360° by 30 degree steps. This allowed us to identify the minimum energy structures which were further optimised *in vacuo* at the B3LYP/6-311++G(2d,2p) level of theory and in the acetonitrile and methanol solutions, using the polarizable continuum model (PCM),<sup>[4]</sup> at the same level. The structures thus obtained were real minimum energy conformers (no imaginary frequencies have been found). Free energy values were used to obtain the Boltzmann population of conformers at 298.15 K. For all stable conformers, the single point energies were calculated at the MP2/Aug-cc-pVTZ level with or without the use of the PCM solvent model. For both DFT and MP2 calculations, only the results for conformers that differ from the most stable by less than 2 kcal mol<sup>-1</sup> have been taken into account for further calculations, following a generally accepted protocol.<sup>[5]</sup> In the case of **1a**, **1b** and **1e** additional calculations at the PCM(MaCN)/MP2/Aug-cc-pVTZ//PCM(MeCN)/MP2/6-311G(d,p) level were performed (results were collected in Tables A2, B3 and B4).

The calculations of optical rotations were carried out for all stable conformers at four different wavelengths (589, 578, 546 and 436 nm), both *in vacuo* and in the solvent, using the DFT/B3LYP/Aug-cc-pVTZ method. London orbitals (which ensure the origin independency of the results) have been used. Since the experimental data were recorded in methanol solution, optical rotations calculated with the use of the PCM model were further taken into account.<sup>[6]</sup>

For all investigated compounds the ECD spectra were measured in acetonitrile solution and calculated at the (PCM)/TDDFT/6-311++G(2d,2p) and (PCM)/TDDFT/Aug-cc-pVTZ levels for all stable geometries optimised at the (PCM)/B3LYP/6-311++G(2d,2p) or at the PCM/MP2/6-311G(d,p) level. In order to determine which combination of functional/basis sets performs better in ECD calculations we employed several density functionals (B3LYP,<sup>[7]</sup> mPW1PW91,<sup>[3]</sup> BHandHLYP,<sup>[8]</sup> B2LYP and B2PLYP<sup>[9,10]</sup>) in conjunction with 6-311++G(2d,2p) and Aug-cc-pVTZ basis sets and PCM solvent model. The test calculations were performed for 2-cyclohexenone **1a**, since its absolute configuration has been known. Arbitrarily we selected the combination of PCM/B2LYP/Aug-cc-pVTZ as a method for further calculations of the ECD spectra of keto-*cis*-diols **1-3**. It should be noted that calculation of perturbative correction to excitation energies (B2PLYP functional) did not improve significantly the results for 2-cyclohexenone **1a**, but considerably increased the CPU time.<sup>[11]</sup> The second best performing was the BHandHLYP/6-311++G(2d,2p) method, due to a similar value of HF-exchange, as in the case of B2LYP functional (50% and 42%, respectively). Interestingly, the most popular hybrid functionals B3LYP and mPW1PW91 did not provide satisfactory results in these studies. The calculated Boltzmann averaged ECD spectra with the use of these functionals correctly reproduced the signs of the long-wavelength  $n_{C=O}-\pi_{C=O}^*$  and short wavelength

$n_{\text{OH}}-\pi_{\text{C=O}}^*$  Cotton effects, however in the spectral region between 280 and 220 nm two negative Cotton effects appeared, which was in disagreement with the experimental spectrum of 2-cyclohexenone **1a** (see Figure K).

The ECD spectra calculated with the use of B3LYP and mPW1PW91 hybrid functionals are a superposition of at least 10 electronic transitions, contrary to the results obtained with the use of B2(P)LYP and BHandHLYP hybrid functionals, where the first three Cotton effects are due to the single electronic transition at a given wavelength.

Rotatory strengths were calculated using both length and velocity representations. In the present study, the differences between the length and velocity of the calculated values of rotatory strengths were quite small and for this reason only the velocity representations were further used. The CD spectra were simulated by overlapping Gaussian functions<sup>[12]</sup> for each transition, according to the procedure previously described.<sup>[13,14-17]</sup>

The geometry/ECD calculations for the model compounds **4-23** were performed similarly to the procedure described above. Note that the geometry optimisations were performed for conformers having fixed given structural parameter. The ECD spectra for **4-23** were calculated at the PCM/B2LYP/6-311++G(2d,2p) level for conformers optimised at the PCM/B3LYP/6-311++G(2d,2p) level.

- 1 N. D. Sharma, C. C. R. Allen, J. F. Malone and D. R. Boyd, *Chem. Commun.*, **2009**, 3633.
- 2 D. R. Boyd, N. D. Sharma, P. Stevenson, C. C. R. Allen, L. Kulakov, H. Mundi, W. C. McRoberts and J. T. G. Hamilton, manuscript in preparation.
- 3 Gaussian 03 (Revision D.0), M. A. Robb, J. R. Cheeseman, J. A. Montgomery, Jr., T. Vreven, K. N. Kudin, J. C. Burant, J. M. Millam, S. S. Iyengar, J. Tomasi, V. Barone, B. Mennucci, M. Cossi, G. Scalmani, N. Rega, G. A. Petersson, H. Nakatsuji, M. Hada, M. Ehara, K. Toyota, R. Fukuda, J. Hasegawa, M. Ishida, T. Nakajima, Y. Honda, O. Kitao, H. Nakai, M. Klene, X. Li, J. E. Knox, H. P. Hratchian, J. B. Cross, V. Bakken, C. Adamo, J. Jaramillo, R. Gomperts, R. E. Stratmann, O. Yazyev, A. J. Austin, R. Cammi, C. Pomelli, J. W. Ochterski, P. Y. Ayala, K. Morokuma, G. A. Voth, P. Salvador, J. J. Dannenberg, V. G. Zakrzewski, S. Dapprich, A. D. Daniels, M. C. Strain, O. Farkas, D. K. Malick, A. D. Rabuck, K. Raghavachari, J. B. Foresman, J. V. Ortiz, Q. Cui, A. G. Baboul, S. Clifford, J. Cioslowski, B. B. Stefanov, G. Liu, A. Liashenko, P. Piskorz, I. Komaromi, R. L. Martin, D. J. Fox, T. Keith, M. A. Al-Laham, C. Y. Peng, A. Nanayakkara, M. Challacombe, P. M. W. Gill, B. Johnson, W. Chen, M. W. Wong, C. Gonzalez, J. A. Pople, Gaussian, Inc., Wallingford CT, 2004.
- 4 (a) D. Marchesan, S. Coriani, C. Forzato, P. Nitti, G. Pitacco, K. Ruud, *J. Phys. Chem. A* **2005**, 109, 1449-1453; (b) B. Mennucci, J. Tomasi, R. Cammi, J. R. Cheeseman, M. Frisch, F. J. Devlin, S. Gabriel, P. J. Stephens, *J. Phys. Chem. A* **2002**, 106, 6102-6113. (c) G. Scalmani, M. J. Frisch, B. Mennucci, J. Tomasi, R. Cammi, V. Barone, *J. Chem. Phys.* **2006**, 124, 094107.
- 5 (a) P. J. Stephens, D. M. McCann, E. Butkus, S. Stončius, J. R. Cheeseman, M. J. Frisch, *J. Org. Chem.* **2004**, 69, 1948-1958; (b) P. J. Stephens, F. J. Devlin, J. R. Cheeseman, M. J. Frisch, O. Bortolini, P. Besse, *Chirality* **2003**, 15, S57.
- 6 (a) M. Pecul, K. Ruud, T. Helgaker, *Chem. Phys. Lett.* **2004**, 388, 110-119; (b) T. Helgaker, K. Ruud, K. L. Bak, P. Jørgensen, J. Olsen, *Faraday Discuss.* **1994**, 99, 165.
- 7 A. D. Becke, *J. Chem. Phys.* **1993**, 98, 5648.
- 8 C. Adamo, V. Barone, *J. Chem. Phys.* **1998**, 108, 664.

- 9 Grimme, S. *J. Chem. Phys.*, **2006**, 124, 034108; (b) S. Grimme, F. Neese, *J. Chem. Phys.* **2007**, 127, 154116; (c) L. Goerigk, S. Grimme, *J. Phys. Chem. A*, **2009**, 113, 767.
- 10 R. Ahlrichs, M. Baer, M. Haeser, H. Horn, C. Koelmel, *Chem. Phys. Lett.* **1989**, 162, 165 (see also [www.turbomole-gmbh.com](http://www.turbomole-gmbh.com) for an overview of the TURBOMOLE program).
- 11 J. Gawronski, M. Kwit, P. Skowronek, *Org. Biomol. Chem.* **2009**, 7, 1562.
- 12 (a) N. Harada, P. Stephens, *Chirality* **2010**, 22, 229-233; (b) N. M. O'Boyle, A. L. Tenderholt, K. M. Langner. *J. Comp. Chem.*, **2008**, 29, 839-845.
- 13 D. R. Boyd, A. Drake, J. Gawronski, M. Kwit, J. F. Malone and N. D. Sharma, *J. Am. Chem. Soc.*, **2005**, 127, 4308.
- 14 M. Kwit, N. D. Sharma, D. R. Boyd, J. Gawronski, *Chem. Eur. J.*, **2007**, 13, 5812.
- 15 M. Kwit, N. D. Sharma, D. R. Boyd, J. Gawronski, *Chirality*, **2008**, 20, 609.
- 16 M. Kwit, J. Gawronski, D.R. Boyd, N. D. Sharma, M. Kaik, R. A. More O'Ferrall and J. S. Kudavalli, *Chem. Eur. J.*, **2008**, 14, 11500.
- 17 M. Kwit, J. Gawronski, L. Sbircea, N. D. Sharma, M. Kaik, D. R. Boyd, *Chirality*, **2009**, 21, E37.



**Table A1.** Relative energies and populations of the stable low-energy conformers of **1-4** calculated at MP2/Aug-cc-pVTZ level of theory with and without the use of PCM model.

| Diol                       | Gas phase                                 |                   | Acetonitrile                              |                   | Methanol                                  |                   |
|----------------------------|-------------------------------------------|-------------------|-------------------------------------------|-------------------|-------------------------------------------|-------------------|
|                            | $\Delta E^a$<br>[kcal mol <sup>-1</sup> ] | Population<br>[%] | $\Delta E^b$<br>[kcal mol <sup>-1</sup> ] | Population<br>[%] | $\Delta E^c$<br>[kcal mol <sup>-1</sup> ] | Population<br>[%] |
| <b>1a(P1)</b>              | 0.00                                      | 48                | 1.96                                      | 1                 | 1.72                                      | 2                 |
| <b>1a(P2)</b>              | 0.52                                      | 20                | 0.47                                      | 18                | 0.29                                      | 22                |
| <b>1a(P3)</b>              | 1.45                                      | 4                 | 0.34                                      | 22                | 0.42                                      | 17                |
| <b>1a(P4)</b>              | 1.16                                      | 7                 | 0.00                                      | 40                | 0.00                                      | 35                |
| <b>1a(M1)</b>              | 1.20                                      | 6                 | 1.80                                      | 2                 | 1.56                                      | 2                 |
| <b>1a(M2)</b>              | 1.57                                      | 3                 | 1.39                                      | 4                 | 0.90                                      | 8                 |
| <b>1a(M3)</b>              | 1.02                                      | 8                 | 1.19                                      | 5                 | 1.04                                      | 6                 |
| <b>1a(M4)</b>              | 1.5                                       | 4                 | 1.02                                      | 8                 | 0.86                                      | 8                 |
| <b>1b(P1)</b>              | 0.00                                      | 38                | 2.32                                      | -                 | 2.13                                      | -                 |
| <b>1b(P2)</b>              | 0.44                                      | 18                | 0.91                                      | 11                | 0.83                                      | 11                |
| <b>1b(P3)</b>              | 1.59                                      | 3                 | <sup>d</sup>                              | -                 | 0.68                                      | 14                |
| <b>1b(P4)</b>              | <sup>d</sup>                              | -                 | 0.00                                      | 54                | 0.00                                      | 44                |
| <b>1b(M1)</b>              | 0.82                                      | 9                 | 1.77                                      | 3                 | 1.64                                      | 2                 |
| <b>1b(M2)</b>              | 1.54                                      | 3                 | 0.99                                      | 10                | 0.89                                      | 9                 |
| <b>1b(M3)</b>              | 0.36                                      | 21                | 1.08                                      | 8                 | 1.02                                      | 8                 |
| <b>1b(M4)</b>              | 0.92                                      | 8                 | 0.79                                      | 14                | 0.76                                      | 12                |
| <b>1c(P1a)<sup>e</sup></b> | 0.11                                      | 19                | 2.61                                      | -                 | 1.90                                      | 1                 |
| <b>1c(P1b)<sup>e</sup></b> | 0.92                                      | 5                 | 3.01                                      | -                 | 2.39                                      | -                 |
| <b>1c(P1c)<sup>e</sup></b> | 0.00                                      | 24                | 2.13                                      | -                 | 1.53                                      | 1                 |
| <b>1c(P2a)<sup>e</sup></b> | 0.98                                      | 4                 | 1.06                                      | 5                 | 0.63                                      | 5                 |
| <b>1c(P2b)<sup>e</sup></b> | 1.46                                      | 2                 | 1.68                                      | 2                 | 1.35                                      | 1                 |
| <b>1c(P2c)<sup>e</sup></b> | 0.53                                      | 10                | 0.86                                      | 7                 | 0.39                                      | 8                 |
| <b>1c(P3a)<sup>e</sup></b> | 2.06                                      | -                 | <sup>d</sup>                              | -                 | 0.88                                      | 3                 |
| <b>1c(P3b)<sup>e</sup></b> | 2.68                                      | -                 | <sup>d</sup>                              | -                 | <sup>d</sup>                              | -                 |
| <b>1c(P4a)<sup>e</sup></b> | 1.71                                      | 1                 | 0.94                                      | 6                 | 0.24                                      | 10                |
| <b>1c(P4b)<sup>e</sup></b> | 2.08                                      | -                 | 1.15                                      | 4                 | 0.64                                      | 5                 |
| <b>1c(P4c)<sup>e</sup></b> | 1.41                                      | 2                 | 0.00                                      | 32                | 0.00                                      | 15                |
| <b>1c(M1a)<sup>e</sup></b> | 1.04                                      | 4                 | 1.77                                      | 1                 | 1.12                                      | 2                 |
| <b>1c(M1b)<sup>e</sup></b> | 1.60                                      | 1                 | 2.00                                      | 1                 | 1.82                                      | 1                 |
| <b>1c(M1c)<sup>e</sup></b> | 1.17                                      | 3                 | 1.87                                      | 1                 | 1.32                                      | 2                 |
| <b>1c(M2a)<sup>e</sup></b> | 1.76                                      | 1                 | 1.01                                      | 6                 | 0.43                                      | 7                 |

|                            |      |    |              |    |              |    |
|----------------------------|------|----|--------------|----|--------------|----|
| <b>1c(M2b)<sup>e</sup></b> | 1.98 | 1  | 1.43         | 3  | 1.19         | 2  |
| <b>1c(M2c)<sup>e</sup></b> | 1.99 | 1  | 1.52         | 2  | 0.60         | 5  |
| <b>1c(M3a)<sup>e</sup></b> | 0.61 | 9  | 1.15         | 4  | 0.60         | 5  |
| <b>1c(M3b)<sup>e</sup></b> | 1.21 | 3  | 1.61         | 2  | 1.31         | 2  |
| <b>1c(M3c)<sup>e</sup></b> | 0.96 | 4  | 1.33         | 3  | 0.78         | 3  |
| <b>1c(M4a)<sup>e</sup></b> | 1.15 | 3  | 0.79         | 8  | 0.24         | 10 |
| <b>1c(M4b)<sup>e</sup></b> | 1.63 | 1  | 1.14         | 5  | 0.68         | 5  |
| <b>1c(M4c)<sup>e</sup></b> | 1.54 | 2  | 0.96         | 6  | 0.41         | 7  |
| <b>1d(P1a)<sup>e</sup></b> | 1.09 | 5  | 3.41         | -  | <sup>d</sup> | -  |
| <b>1d(P1c)<sup>e</sup></b> | 1.26 | 4  | 3.43         | -  | 3.27         | -  |
| <b>1d(P1d)<sup>e</sup></b> | 0.00 | 30 | 2.27         | -  | 1.94         | 1  |
| <b>1d(P2a)<sup>e</sup></b> | 1.76 | 1  | 1.66         | 2  | 1.52         | 2  |
| <b>1d(P2c)<sup>e</sup></b> | 1.78 | 1  | 2.27         | -  | 1.67         | 1  |
| <b>1d(P2d)<sup>e</sup></b> | 0.56 | 11 | 0.78         | 9  | 0.38         | 13 |
| <b>1d(P3a)<sup>e</sup></b> | 2.85 | -  | 1.67         | 2  | 1.45         | 2  |
| <b>1d(P3c)<sup>e</sup></b> | 3.85 | -  | <sup>d</sup> | -  | <sup>d</sup> | -  |
| <b>1d(P3d)<sup>e</sup></b> | 2.02 | -  | <sup>d</sup> | -  | <sup>d</sup> | -  |
| <b>1d(P4a)<sup>e</sup></b> | 2.37 | -  | 1.27         | 4  | 1.18         | 4  |
| <b>1d(P4c)<sup>e</sup></b> | 2.74 | -  | 1.48         | 3  | 1.67         | 1  |
| <b>1d(P4d)<sup>e</sup></b> | 1.43 | 3  | 0.00         | 35 | 0.00         | 25 |
| <b>1d(M1a)<sup>e</sup></b> | 1.00 | 6  | 1.70         | 2  | 1.43         | 2  |
| <b>1d(M1b)<sup>e</sup></b> | 1.50 | 2  | 1.85         | 1  | 2.15         | -  |
| <b>1d(M1c)<sup>e</sup></b> | 1.33 | 3  | 1.98         | 1  | 1.75         | 1  |
| <b>1d(M2a)<sup>e</sup></b> | 1.86 | 1  | 0.91         | 7  | 0.79         | 7  |
| <b>1d(M2b)<sup>e</sup></b> | 1.86 | 1  | 1.35         | 3  | 1.15         | 4  |
| <b>1d(M2c)<sup>e</sup></b> | 1.52 | 2  | 1.32         | 4  | 1.16         | 4  |
| <b>1d(M3a)<sup>e</sup></b> | 0.44 | 14 | 1.10         | 5  | 0.81         | 6  |
| <b>1d(M3b)<sup>e</sup></b> | 1.22 | 4  | 1.76         | 2  | 1.38         | 2  |
| <b>1d(M3c)<sup>e</sup></b> | 1.07 | 6  | 1.50         | 3  | 1.28         | 3  |
| <b>1d(M4a)<sup>e</sup></b> | 1.35 | 3  | 0.72         | 10 | 0.55         | 10 |
| <b>1d(M4b)<sup>e</sup></b> | 1.61 | 2  | 1.59         | 2  | 0.89         | 6  |
| <b>1d(M4c)<sup>e</sup></b> | 1.54 | 2  | 1.11         | 5  | 0.85         | 6  |
| <b>1e(P1)</b>              | 0.97 | 8  | 3.52         | -  | 3.25         | -  |
| <b>1e(P2)</b>              | 1.52 | 3  | 1.98         | 2  | 1.80         | 2  |
| <b>1e(P4)</b>              | 2.56 | -  | 1.42         | 4  | 1.62         | 3  |

|                            |              |    |              |    |              |    |
|----------------------------|--------------|----|--------------|----|--------------|----|
| <b>1e(M1)</b>              | 0.22         | 28 | <sup>d</sup> | -  | 0.84         | 12 |
| <b>1e(M2)</b>              | <sup>d</sup> | -  | 0.29         | 28 | 0.24         | 33 |
| <b>1e(M3)</b>              | 0.00         | 42 | 0.50         | 20 | <sup>d</sup> | -  |
| <b>1e(M4)</b>              | 0.46         | 19 | 0.00         | 46 | 0.00         | 50 |
| <b>2a(P1)</b>              | 0.00         | 70 | 1.52         | 3  | 1.50         | 3  |
| <b>2a(P2)</b>              | <sup>d</sup> | -  | 0.00         | 38 | 0.14         | 35 |
| <b>2a(P3)</b>              | 1.09         | 10 | 0.23         | 25 | 0.53         | 18 |
| <b>2a(P4)</b>              | 0.74         | 20 | 0.06         | 34 | 0.00         | 44 |
| <b>2a(M1)</b>              | 2.72         | -  | 4.27         | -  | 4.31         | -  |
| <b>2a(M2)</b>              | 2.99         | -  | 3.01         | -  | 2.76         | -  |
| <b>2a(M3)</b>              | 2.89         | -  | 2.67         | -  | 2.59         | -  |
| <b>2a(M4)</b>              | 2.5          | -  | 2.30         | -  | 2.51         | -  |
| <b>2b(P1)</b>              | 0.00         | 54 | 1.91         | 2  | 1.59         | 4  |
| <b>2b(P2)</b>              | 0.25         | 35 | 0.45         | 31 | 0.35         | 34 |
| <b>2b(P3)</b>              | 1.60         | 3  | <sup>d</sup> | -  | <sup>d</sup> | -  |
| <b>2b(P4)</b>              | 1.13         | 8  | 0.00         | 67 | 0.00         | 62 |
| <b>2b(M1)</b>              | 2.77         | -  | 4.43         | -  | 4.42         | -  |
| <b>2b(M2)</b>              | 3.19         | -  | 3.15         | -  | 2.27         | -  |
| <b>2b(M3)</b>              | 2.18         | -  | 2.19         | -  | 2.20         | -  |
| <b>2b(M4)</b>              | 2.61         | -  | 2.09         | -  | 2.11         | -  |
| <b>2c(P1a)<sup>e</sup></b> | 0.00         | 36 | 2.47         | -  | 2.25         | -  |
| <b>2c(P1b)<sup>e</sup></b> | 0.47         | 16 | 1.51         | 3  | 1.46         | 4  |
| <b>2c(P1c)<sup>e</sup></b> | 0.51         | 15 | 1.17         | 6  | 1.05         | 6  |
| <b>2c(P2a)<sup>e</sup></b> | 0.52         | 15 | 0.74         | 13 | 0.00         | 37 |
| <b>2c(P2b)<sup>e</sup></b> | 1.17         | 5  | 2.72         | -  | 2.51         | -  |
| <b>2c(P2c)<sup>e</sup></b> | 1.32         | 4  | 3.47         | -  | 3.48         | -  |
| <b>2c(P3a)<sup>e</sup></b> | 1.60         | 2  | <sup>d</sup> | -  | 1.23         | 4  |
| <b>2c(P3b)<sup>e</sup></b> | 1.63         | 2  | 0.68         | 14 | <sup>d</sup> | -  |
| <b>2c(P3c)<sup>e</sup></b> | 1.64         | 2  | <sup>d</sup> | -  | <sup>d</sup> | -  |
| <b>2c(P4a)<sup>e</sup></b> | 1.81         | 2  | 0.83         | 12 | 0.78         | 10 |
| <b>2c(P4b)<sup>e</sup></b> | 1.99         | 1  | 0.00         | 46 | 0.01         | 37 |
| <b>2c(P4c)<sup>e</sup></b> | 2.09         | -  | 2.14         | -  | 2.09         | -  |
| <b>2c(M1a)<sup>e</sup></b> | 2.30         | -  | 3.48         | -  | 3.56         | -  |
| <b>2c(M1b)<sup>e</sup></b> | 2.57         | -  | 6.20         | -  | 6.20         | -  |
| <b>2c(M1c)<sup>e</sup></b> | 2.85         | -  | <sup>d</sup> | -  | <sup>d</sup> | -  |

|                            |      |    |              |    |              |    |
|----------------------------|------|----|--------------|----|--------------|----|
| <b>2c(M2a)<sup>e</sup></b> | 3.14 | -  | 1.87         | 2  | 2.10         | -  |
| <b>2c(M2b)<sup>e</sup></b> | 3.41 | -  | 4.62         | -  | 4.53         | -  |
| <b>2c(M2c)<sup>e</sup></b> | 4.11 | -  | <sup>d</sup> | -  | <sup>d</sup> | -  |
| <b>2c(M3a)<sup>e</sup></b> | 4.59 | -  | 1.94         | 2  | 1.93         | 1  |
| <b>2c(M3b)<sup>e</sup></b> | 4.61 | -  | 4.02         | -  | 4.12         | -  |
| <b>2c(M3c)<sup>e</sup></b> | 5.00 | -  | 4.73         | -  | 4.94         | -  |
| <b>2c(M4a)<sup>e</sup></b> | 5.09 | -  | 1.94         | 2  | 1.99         | 1  |
| <b>2c(M4b)<sup>e</sup></b> | 5.17 | -  | 4.05         | -  | 3.98         | -  |
| <b>2c(M4c)<sup>e</sup></b> | 5.41 | -  | 4.91         | -  | 4.95         | -  |
| <b>3a(P1)</b>              | 0.00 | 24 | 1.38         | 2  | 1.53         | 2  |
| <b>3a(P2)</b>              | 0.12 | 20 | 0.06         | 23 | 0.06         | 24 |
| <b>3a(P3)</b>              | 1.22 | 3  | 0.11         | 21 | 0.16         | 20 |
| <b>3a(P4)</b>              | 0.89 | 5  | 0.00         | 26 | 0.00         | 26 |
| <b>3a(M1)</b>              | 0.30 | 16 | 0.86         | 6  | 0.84         | 6  |
| <b>3a(M2)</b>              | 0.82 | 6  | 0.70         | 8  | 0.81         | 6  |
| <b>3a(M3)</b>              | 0.11 | 20 | 1.06         | 4  | 0.93         | 6  |
| <b>3a(M4)</b>              | 0.78 | 6  | 0.62         | 10 | 0.55         | 10 |
| <b>3b(P1)</b>              | 0.17 | 24 | 1.66         | 2  | 1.62         | 2  |
| <b>3b(P2)</b>              | 0.56 | 13 | 0.48         | 14 | 0.39         | 15 |
| <b>3b(P3)</b>              | 1.88 | 1  | 0.63         | 11 | <sup>d</sup> | -  |
| <b>3b(P4)</b>              | 1.46 | 3  | 0.00         | 32 | 0.00         | 30 |
| <b>3b(M1)</b>              | 0.50 | 14 | 0.85         | 7  | 0.71         | 9  |
| <b>3b(M2)</b>              | 1.36 | 3  | 0.41         | 16 | 0.34         | 17 |
| <b>3b(M3)</b>              | 0.00 | 33 | <sup>d</sup> | -  | 0.70         | 9  |
| <b>3b(M4)</b>              | 0.73 | 9  | 0.34         | 18 | 0.31         | 18 |
| <b>3c(P1a)<sup>e</sup></b> | 0.00 | 24 | 2.02         | -  | 1.72         | 1  |
| <b>3c(P1b)<sup>e</sup></b> | 2.09 | -  | 4.31         | -  | 3.88         | -  |
| <b>3c(P1c)<sup>e</sup></b> | 0.48 | 11 | 2.84         | -  | 1.28         | 2  |
| <b>3c(P2a)<sup>e</sup></b> | 0.38 | 13 | 0.81         | 11 | 0.05         | 19 |
| <b>3c(P2b)<sup>e</sup></b> | 2.62 | -  | 3.23         | -  | 2.66         | -  |
| <b>3c(P2c)<sup>e</sup></b> | 1.07 | 4  | 1.21         | 6  | 0.50         | 9  |
| <b>3c(P3a)<sup>e</sup></b> | 1.79 | 1  | 0.98         | 8  | 1.15         | 3  |
| <b>3c(P3b)<sup>e</sup></b> | 3.65 | -  | <sup>d</sup> | -  | <sup>d</sup> | -  |
| <b>3c(P3c)<sup>e</sup></b> | 2.44 | -  | 1.56         | 3  | 0.86         | 5  |
| <b>3c(P4a)<sup>e</sup></b> | 1.36 | 2  | 0.00         | 45 | 0.00         | 21 |

|                            |      |     |              |     |              |     |
|----------------------------|------|-----|--------------|-----|--------------|-----|
| <b>3c(P4b)<sup>e</sup></b> | 3.13 | -   | 2.94         | -   | 2.36         | -   |
| <b>3c(P4c)<sup>e</sup></b> | 2.08 | -   | 0.99         | 8   | 0.31         | 12  |
| <b>3c(M1a)<sup>e</sup></b> | 1.19 | 3   | 2.41         | -   | 1.81         | 1   |
| <b>3c(M1b)<sup>e</sup></b> | 0.62 | 8   | 1.63         | 3   | 0.94         | 5   |
| <b>3c(M1c)<sup>e</sup></b> | 2.24 | -   | 3.46         | -   | 2.76         | -   |
| <b>3c(M2a)<sup>e</sup></b> | 2.12 | -   | 2.05         | -   | 1.78         | 1   |
| <b>3c(M2b)<sup>e</sup></b> | 1.42 | 2   | 1.13         | 6   | 0.54         | 9   |
| <b>3c(M2c)<sup>e</sup></b> | 1.02 | 4   | 3.46         | -   | 1.86         | 1   |
| <b>3c(M3a)<sup>e</sup></b> | 0.12 | 20  | 2.55         | -   | <sup>d</sup> | -   |
| <b>3c(M3b)<sup>e</sup></b> | 1.95 | 1   | <sup>d</sup> | -   | 2.73         | -   |
| <b>3c(M3c)<sup>e</sup></b> | 3.08 | -   | 3.57         | -   | 2.90         | -   |
| <b>3c(M4a)<sup>e</sup></b> | 1.59 | 1   | 1.91         | 2   | 1.35         | 2   |
| <b>3c(M4b)<sup>e</sup></b> | 0.84 | 6   | 1.08         | 7   | 0.48         | 9   |
| <b>3c(M4c)<sup>e</sup></b> | 2.45 | -   | 2.86         | -   | 2.29         | -   |
| <b>4(P)=4(M)</b>           | 0.00 | 100 | 0.00         | 100 | 0.00         | 100 |

[a] MP2/Aug-cc-pVTZ//B3LYP/6-311++G(2d,2p); [b] PCM(MeCN)/MP2/Aug-cc-pVTZ//PCM(MeCN)/B3LYP/6-311++G(2d,2p); [c] PCM(MeOH)/MP2/Aug-cc-pVTZ//PCM(MeOH)/B3LYP/6-311++G(2d,2p); [d] not found at this level of theory; [e] labels a-d refer to the rotamers due to the Et or *i*-Pr substituents (see Figure 5).

**Table A2.** Relative energies and populations of the stable low-energy conformers of **1a**, **1b** and **1e** calculated at PCM(MeCN)/MP2/Aug-cc-pVTZ//PCM(MeCN)/MP2/6-311G(d,p) level of theory.

| Conformer | <b>1a</b>                               |                   | <b>1b</b>                               |                   | <b>1e</b>                               |                   |
|-----------|-----------------------------------------|-------------------|-----------------------------------------|-------------------|-----------------------------------------|-------------------|
|           | $\Delta E$<br>[kcal mol <sup>-1</sup> ] | Population<br>[%] | $\Delta E$<br>[kcal mol <sup>-1</sup> ] | Population<br>[%] | $\Delta E$<br>[kcal mol <sup>-1</sup> ] | Population<br>[%] |
| (P1)      | 0.55                                    | 11                | 0.39                                    | 14                | 1.33                                    | 3                 |
| (P2)      | 0.00                                    | 27                | 0.06                                    | 24                | 0.93                                    | 5                 |
| (P3)      | 0.59                                    | 10                | -                                       | -                 | -                                       | -                 |
| (P4)      | 0.02                                    | 27                | 0.00                                    | 27                | 1.20                                    | 3                 |
| (M1)      | 0.78                                    | 7                 | 0.66                                    | 9                 | 0.00                                    | 27                |
| (M2)      | 0.77                                    | 7                 | 0.76                                    | 7                 | 0.12                                    | 22                |
| (M3)      | 1.10                                    | 4                 | 0.85                                    | 6                 | 0.35                                    | 15                |
| (M4)      | 0.8                                     | 7                 | 0.55                                    | 11                | 0.04                                    | 25                |

**Table B1.** Structural parameters that characterize low-energy conformers of **1-4** calculated at the PCM(MeCN)/B3LYP/6-311++G(2d,2p) level.

| Diol                       | OH...O<br>[Å] | Torsion angle<br>[°] |           |            |             |                |
|----------------------------|---------------|----------------------|-----------|------------|-------------|----------------|
|                            |               | $\alpha^a$           | $\beta^b$ | $\omega^c$ | $\varphi^d$ | $\varphi^{>d}$ |
| <b>1a(P1)</b>              | 2.503         | -176.3               | -168.8    | 179.1      |             |                |
| <b>1a(P2)</b>              | 2.440         | -176.4               | -37.7     | 177.3      |             |                |
| <b>1a(P3)</b>              | 2.472         | 43.9                 | 54.7      | 177.3      |             |                |
| <b>1a(P4)</b>              | 2.507         | -42.1                | 60.0      | 177.8      |             |                |
| <b>1a(M1)</b>              | 2.505         | 156.9                | 176.6     | -176.4     |             |                |
| <b>1a(M2)</b>              | 2.480         | 30.6                 | 177.8     | -177.8     |             |                |
| <b>1a(M3)</b>              | 2.582         | -45.2                | -47.6     | -177.5     |             |                |
| <b>1a(M4)</b>              | 2.495         | -59.6                | 37.5      | -179.1     |             |                |
| <b>1b(P1)</b>              | 2.392         | -167.0               | -167.6    | 179.1      |             |                |
| <b>1b(P2)</b>              | 2.365         | -168.9               | -41.1     | 177.6      |             |                |
| <b>1b(P3)<sup>e</sup></b>  | 2.443         | 16.6                 | 56.7      | 178.3      |             |                |
| <b>1b(P4)</b>              | 2.402         | -42.8                | 65.9      | 178.1      |             |                |
| <b>1b(M1)</b>              | 2.522         | 159.8                | 177.4     | -178.4     |             |                |
| <b>1b(M2)</b>              | 2.618         | -26.4                | -174.7    | -178.9     |             |                |
| <b>1b(M3)</b>              | 2.585         | -45.6                | -45.7     | -179.2     |             |                |
| <b>1b(M4)</b>              | 2.579         | -52.4                | 40.4      | 178.8      |             |                |
| <b>1c(P1a)</b>             | 2.445         | -171.1               | -169.3    | -179.6     | -3.6        |                |
| <b>1c(P1b)</b>             | 2.308         | -156.3               | -163.8    | 179.0      | 90.8        |                |
| <b>1c(P1c)</b>             | 2.430         | -168.4               | -169.3    | -179.3     | -111.5      |                |
| <b>1c(P2a)</b>             | 2.376         | -170.1               | -43.3     | 177.5      | -3.8        |                |
| <b>1c(P2b)</b>             | 2.257         | -157.3               | -39.6     | 176.7      | 90.9        |                |
| <b>1c(P2c)</b>             | 2.357         | -167.9               | -39.6     | 178.2      | -112.7      |                |
| <b>1c(P3a)<sup>e</sup></b> | 2.505         | 24.2                 | 54.3      | 178.2      | -3.2        |                |
| <b>1c(P4a)</b>             | 2.504         | -43.0                | 59.2      | 178.4      | -3.5        |                |
| <b>1c(P4b)</b>             | 2.443         | -38.8                | 61.6      | 176.8      | 92.0        |                |
| <b>1c(P4c)</b>             | 2.442         | -41.4                | 64.9      | 178.6      | -113.3      |                |
| <b>1c(M1a)</b>             | 2.508         | 158.4                | 176.7     | -178.1     | 4.9         |                |
| <b>1c(M1b)</b>             | 2.420         | 160.2                | 170.9     | -179.6     | 119.2       |                |
| <b>1c(M1c)</b>             | 2.520         | 158.7                | 177.5     | -178.0     | -102.6      |                |
| <b>1c(M2a)</b>             | 2.625         | -25.0                | -174.2    | -179.1     | 4.2         |                |
| <b>1c(M2b)</b>             | 2.536         | -24.4                | 179.4     | 179.9      | 118.4       |                |

---

|                           |       |        |        |        |        |        |
|---------------------------|-------|--------|--------|--------|--------|--------|
| <b>1c(M2c)</b>            | 2.499 | 18.6   | 178.0  | -179.0 | -104.4 |        |
| <b>1c(M3a)</b>            | 2.579 | -45.6  | -46.4  | -179.2 | 4.0    |        |
| <b>1c(M3b)</b>            | 2.509 | -50.9  | -49.0  | 179.1  | 119.6  |        |
| <b>1c(M3c)</b>            | 2.602 | -43.3  | -46.9  | -178.8 | -103.0 |        |
| <b>1c(M4a)</b>            | 2.554 | -54.4  | 42.0   | 179.3  | 3.2    |        |
| <b>1c(M4b)</b>            | 2.498 | -57.7  | 42.0   | 177.4  | 119.1  |        |
| <b>1c(M4c)</b>            | 2.605 | -49.9  | 42.0   | 179.6  | -103.6 |        |
| <b>1d(P1a)</b>            | 2.253 | -155.9 | -161.4 | 178.5  |        | -158.8 |
| <b>1d(P1c)</b>            | 2.263 | -158.2 | -161.3 | 178.5  |        | -11.2  |
| <b>1d(P1d)</b>            | 2.398 | -167.1 | -168.4 | -179.9 |        | 132.5  |
| <b>1d(P2a)</b>            | 2.226 | -157.6 | -40.3  | 175.4  |        | -158.8 |
| <b>1d(P2c)</b>            | 2.204 | -156.0 | -39.2  | 176.3  |        | -12.8  |
| <b>1d(P2d)</b>            | 2.389 | -170.1 | -39.7  | 178.4  |        | 133.3  |
| <b>1d(P3a)</b>            | 2.419 | 22.1   | 56.8   | 177.1  |        | -157.9 |
| <b>1d(P4a)</b>            | 2.453 | -40.4  | 60.5   | 176.6  |        | -156.6 |
| <b>1d(P4c)</b>            | 2.400 | -39.7  | 63.2   | 177.1  |        | -11.9  |
| <b>1d(P4d)</b>            | 2.442 | -43.7  | 65.0   | 178.4  |        | 131.1  |
| <b>1d(M1a)</b>            | 2.479 | 160.7  | 173.4  | -177.7 |        | 149.0  |
| <b>1d(M1b)</b>            | 2.444 | 160.4  | 172.6  | 179.5  |        | -128.4 |
| <b>1d(M1c)</b>            | 2.516 | 160.0  | 177.5  | -178.8 |        | 8.9    |
| <b>1d(M2a)</b>            | 2.627 | -24.8  | -174.1 | -178.3 |        | 144.1  |
| <b>1d(M2b)</b>            | 2.497 | -8.3   | 177.2  | 177.8  |        | -128.7 |
| <b>1d(M2c)</b>            | 2.641 | -25.5  | -173.7 | 180.0  |        | 10.2   |
| <b>1d(M3a)</b>            | 2.632 | -41.3  | -48.3  | -178.4 |        | 144.1  |
| <b>1d(M3b)</b>            | 2.345 | -66.5  | -68.7  | 180.0  |        | -131.0 |
| <b>1d(M3c)</b>            | 2.592 | -44.6  | -54.8  | -179.8 |        | 10.5   |
| <b>1d(M4a)</b>            | 2.592 | -51.3  | 42.4   | 179.8  |        | 144.1  |
| <b>1d(M4b)</b>            | 2.385 | -66.2  | 39.7   | 178.8  |        | -131.0 |
| <b>1d(M4c)</b>            | 2.619 | -48.4  | 42.5   | 178.2  |        | 9.8    |
| <b>1e(P1)</b>             | 2.239 | -155.3 | -166.1 | 177.9  | -13.2  |        |
| <b>1e(P2)</b>             | 2.188 | -155.8 | -39.2  | 175.6  | -13.4  |        |
| <b>1e(P4)</b>             | 2.361 | -39.8  | 64.6   | 176.0  | -13.5  |        |
| <b>1e(M1)<sup>e</sup></b> | 2.517 | 158.5  | 177.8  | -179.7 | 11.7   |        |
| <b>1e(M2)</b>             | 2.581 | -25.5  | -171.0 | 179.2  | 10.0   |        |
| <b>1e(M3)</b>             | 2.686 | -36.9  | -50.4  | 178.4  | 11.2   |        |

---

---

|                |       |        |        |        |                    |
|----------------|-------|--------|--------|--------|--------------------|
| <b>1e(M4)</b>  | 2.605 | -50.0  | 42.9   | 177.6  | 10.3               |
| <b>2a(P1)</b>  | 2.513 | -176.1 | -174.5 | 175.2  |                    |
| <b>2a(P2)</b>  | 2.602 | 174.1  | 27.5   | 173.4  |                    |
| <b>2a(P3)</b>  | 2.508 | 46.6   | 51.0   | 174.3  |                    |
| <b>2a(P4)</b>  | 2.509 | -37.7  | 57.0   | 173.5  |                    |
| <b>2a(M1)</b>  | 2.308 | 147.3  | 159.1  | -173.1 |                    |
| <b>2a(M2)</b>  | 2.310 | 29.6   | 158.8  | -174.0 |                    |
| <b>2a(M3)</b>  | 2.562 | -47.5  | -48.8  | -175.2 |                    |
| <b>2a(M4)</b>  | 2.443 | -63.1  | 37.1   | -176.6 |                    |
| <b>2b(P1)</b>  | 2.410 | -167.9 | -171.4 | 175.7  |                    |
| <b>2b(P2)</b>  | 2.408 | -171.7 | -9.2   | 174.2  |                    |
| <b>2b(P4)</b>  | 2.504 | -42.8  | 59.3   | 174.7  |                    |
| <b>2b(M1)</b>  | 2.270 | 159.5  | 153.7  | -174.0 |                    |
| <b>2b(M2)</b>  | 2.218 | 7.0    | 158.5  | -178.0 |                    |
| <b>2b(M3)</b>  | 2.470 | -53.0  | -45.8  | -176.3 |                    |
| <b>2b(M4)</b>  | 2.453 | -61.8  | 38.4   | -178.0 |                    |
| <b>2c(P1a)</b> | 2.408 | -167.1 | -173.4 | 171.9  | 78.2 <sup>f</sup>  |
| <b>2c(P1b)</b> | 2.432 | -168.1 | -174.2 | 178.9  | 167.7 <sup>f</sup> |
| <b>2c(P2c)</b> | 2.240 | -155.2 | -171.2 | 178.4  | -65.2 <sup>f</sup> |
| <b>2c(P2a)</b> | 2.375 | -170.1 | -19.4  | 169.5  | 78.6 <sup>f</sup>  |
| <b>2c(P2b)</b> | 2.358 | -167.7 | -30.9  | 174.6  | 167.4 <sup>f</sup> |
| <b>2c(P2c)</b> | 2.379 | -170.3 | 32.5   | 178.5  | -66.1 <sup>f</sup> |
| <b>2c(P3b)</b> | 2.489 | 15.4   | 51.6   | 175.1  | 168.3 <sup>f</sup> |
| <b>2c(P4a)</b> | 2.469 | -42.5  | 59.1   | 169.8  | 78.9 <sup>f</sup>  |
| <b>2c(P4b)</b> | 2.486 | -43.3  | 60.2   | 175.3  | 168.4 <sup>f</sup> |
| <b>2c(P4c)</b> | 2.477 | -44.4  | 59.6   | 178.7  | -63.4 <sup>f</sup> |
| <b>2c(M1a)</b> | 2.281 | 157.4  | 154.5  | -170.6 | 73.6 <sup>f</sup>  |
| <b>2c(M1b)</b> | 2.263 | 155.4  | 152.3  | -176.2 | 146.8 <sup>f</sup> |
| <b>2c(M2a)</b> | 2.288 | 5.5    | 158.6  | -170.6 | 70.1 <sup>f</sup>  |
| <b>2c(M2b)</b> | 2.263 | 4.6    | 154.2  | -174.7 | 149.8 <sup>f</sup> |
| <b>2c(M3a)</b> | 2.472 | -53.3  | -48.8  | -172.1 | 72.1 <sup>f</sup>  |
| <b>2c(M3b)</b> | 2.495 | -51.6  | -44.1  | -175.5 | 156.9 <sup>f</sup> |
| <b>2c(M3c)</b> | 2.312 | -66.2  | -56.1  | -177.7 | -45.4 <sup>f</sup> |
| <b>2c(M4a)</b> | 2.416 | -65.0  | 38.5   | -173.1 | 71.2 <sup>f</sup>  |
| <b>2c(M4b)</b> | 2.400 | -63.8  | 35.6   | -175.2 | 157.6 <sup>f</sup> |

---



---

|                           |       |        |        |        |                     |
|---------------------------|-------|--------|--------|--------|---------------------|
| <b>2c(M4c)</b>            | 2.459 | -72.4  | 31.2   | -177.5 | -46.5 <sup>f</sup>  |
| <b>3a(P1)</b>             | 2.456 | -174.9 | -176.8 | 179.4  |                     |
| <b>3a(P2)</b>             | 2.372 | -174.1 | -45.9  | 176.3  |                     |
| <b>3a(P3)</b>             | 2.430 | 46.7   | 55.9   | 176.5  |                     |
| <b>3a(P4)</b>             | 2.441 | -40.6  | 62.3   | 176.4  |                     |
| <b>3a(M1)</b>             | 2.473 | 162.5  | 175.6  | -174.5 |                     |
| <b>3a(M2)</b>             | 2.402 | 35.2   | 173.9  | -175.6 |                     |
| <b>3a(M3)</b>             | 2.555 | -45.4  | -17.7  | -175.0 |                     |
| <b>3a(M4)</b>             | 2.562 | -51.3  | 37.8   | -177.7 |                     |
| <b>3b(P1)</b>             | 2.380 | -167.7 | -172.3 | 179.8  |                     |
| <b>3b(P2)</b>             | 2.326 | -168.8 | -44.6  | 176.6  |                     |
| <b>3b(P3)</b>             | 2.447 | 9.4    | 54.7   | 177.1  |                     |
| <b>3b(P4)</b>             | 2.434 | -40.9  | 61.7   | 176.9  |                     |
| <b>3b(M1)</b>             | 2.464 | 165.8  | 175.0  | -176.2 |                     |
| <b>3b(M2)</b>             | 2.608 | -29.6  | -173.2 | -176.9 |                     |
| <b>3b(M3)<sup>e</sup></b> | 2.519 | -47.5  | -12.5  | -176.3 |                     |
| <b>3b(M4)</b>             | 2.523 | -53.9  | 39.0   | -179.6 |                     |
| <b>3c(P1a)</b>            | 2.376 | -167.3 | -172.6 | 174.0  | -70.4 <sup>f</sup>  |
| <b>3c(P1b)</b>            | 2.283 | -163.3 | -166.5 | 175.2  | 57.0 <sup>f</sup>   |
| <b>3c(P1c)</b>            | 2.338 | -165.2 | -168.5 | 178.4  | -168.3 <sup>f</sup> |
| <b>3c(P2a)</b>            | 2.184 | -159.8 | -52.2  | 173.2  | -70.3 <sup>f</sup>  |
| <b>3c(P2b)</b>            | 2.247 | -165.6 | -44.1  | -179.3 | 60.6 <sup>f</sup>   |
| <b>3c(P2c)</b>            | 2.339 | -169.5 | -42.2  | 176.6  | -169.9 <sup>f</sup> |
| <b>3c(P3a)</b>            | 2.322 | 35.9   | 66.5   | 173.9  | -73.2 <sup>f</sup>  |
| <b>3c(P3c)</b>            | 2.439 | 18.2   | 54.4   | 177.3  | -170.2 <sup>f</sup> |
| <b>3c(P4a)</b>            | 2.381 | -40.9  | 64.8   | 171.8  | -71.0 <sup>f</sup>  |
| <b>3c(P4b)</b>            | 2.341 | -40.4  | 65.2   | -177.9 | 62.9 <sup>f</sup>   |
| <b>3c(P4c)</b>            | 2.365 | -41.2  | 69.0   | 177.9  | -168.2 <sup>f</sup> |
| <b>3c(M1a)</b>            | 2.384 | 164.9  | 170.4  | -170.9 | -80.0 <sup>f</sup>  |
| <b>3c(M1b)</b>            | 2.514 | 165.8  | 176.9  | 180.0  | 63.0 <sup>f</sup>   |
| <b>3c(M1c)</b>            | 2.381 | 165.2  | 166.8  | -175.0 | -145.4 <sup>f</sup> |
| <b>3c(M2a)</b>            | 2.580 | -27.9  | -174.0 | -171.9 | -80.2 <sup>f</sup>  |
| <b>3c(M2b)</b>            | 2.637 | -29.3  | -172.5 | 179.5  | 69.2 <sup>f</sup>   |
| <b>3c(M3c)</b>            | 2.379 | 14.4   | 168.9  | -177.9 | -145.4 <sup>f</sup> |
| <b>3c(M3a)</b>            | 2.533 | -46.0  | -10.3  | -172.1 | -80.0 <sup>f</sup>  |

---

|                |       |       |       |        |                     |
|----------------|-------|-------|-------|--------|---------------------|
| <b>3c(M3c)</b> | 2.578 | -44.5 | -12.8 | -177.9 | -142.8 <sup>f</sup> |
| <b>3c(M4a)</b> | 2.514 | -52.4 | 37.1  | -174.5 | -80.5 <sup>f</sup>  |
| <b>3c(M4b)</b> | 2.505 | -56.0 | 39.6  | 179.2  | 70.2 <sup>f</sup>   |
| <b>3c(M4c)</b> | 2.516 | -55.3 | 40.7  | 179.8  | -143.9 <sup>f</sup> |
| <b>4(M,P)</b>  |       |       |       | ±174.5 |                     |

[a] H-C4-O-H; [b] H-C5-O-H; [c] C3-C2-C1=O; [d]  $\varphi = \text{C2}=\text{C3}-\text{C}(\text{H}_2)-\text{C}(\text{H}_3)$ ,  $\varphi' = \text{C2}=\text{C3}-\text{C}(\text{Me}_2)-\text{H}$ ; [e] found at PCM(MeOH)/B3LYP/6-311++G(2d,2p) level; [f] C1-C6-C(H<sub>2</sub>)-C(H<sub>3</sub>)

**Table B2.** Values of intra-ring torsion angles that characterize the low-energy conformers of **1-4** calculated at the PCM(MeCN)/B3LYP/6-311++G(2d,2p) level.

| Compound        | Torsion angle <sup>a</sup> [°] |                |                |                |                |                |
|-----------------|--------------------------------|----------------|----------------|----------------|----------------|----------------|
|                 | C <sub>1</sub>                 | C <sub>2</sub> | C <sub>3</sub> | C <sub>4</sub> | C <sub>5</sub> | C <sub>6</sub> |
| <b>1a</b> (P1)  | -0.3                           | -23.3          | 47.9           | -51.5          | 28.7           | -2.1           |
| <b>1a</b> (P2)  | -0.2                           | -21.5          | 46.6           | -52.6          | 31.7           | -4.8           |
| <b>1a</b> (P3)  | 0.2                            | -23.8          | 48.2           | -51.5          | 29.0           | -2.6           |
| <b>1a</b> (P4)  | 0.7                            | -24.3          | 48.2           | -50.8          | 28.3           | -2.5           |
| <b>1a</b> (M1)  | -0.2                           | 20.6           | -46.1          | 52.8           | -33.0          | 6.6            |
| <b>1a</b> (M2)  | 0.1                            | 22.4           | -48.5          | 54.1           | -32.2          | 4.8            |
| <b>1a</b> (M3)  | 1.7                            | 20.2           | -48.5          | 55.8           | -34.0          | 5.4            |
| <b>1a</b> (M4)  | 1.7                            | 20.5           | -47.9          | 54.3           | -32.5          | 4.4            |
| <b>1b</b> (P1)  | 2.0                            | -26.2          | 49.3           | -50.4          | 27.4           | -2.4           |
| <b>1b</b> (P2)  | 1.9                            | -25.7          | 50.1           | -52.7          | 30.1           | -4.1           |
| <b>1b</b> (P4)  | 2.3                            | -25.9          | 49.9           | -51.7          | 29.4           | -3.9           |
| <b>1b</b> (M1)  | -0.9                           | 25.3           | -50.6          | 52.5           | -28.6          | 2.5            |
| <b>1b</b> (M2)  | 0.4                            | 24.4           | -50.5          | 53.3           | -29.4          | 2.2            |
| <b>1b</b> (M3)  | 0.1                            | 25.4           | -51.8          | 54.0           | -29.1          | 1.8            |
| <b>1b</b> (M4)  | 0.0                            | 26.8           | -52.8          | 52.9           | -26.9          | -0.1           |
| <b>1c</b> (P1a) | 2.6                            | -28.2          | 50.8           | -49.9          | 25.8           | -1.2           |
| <b>1c</b> (P1b) | 2.1                            | -26.1          | 49.7           | -50.8          | 27.8           | -2.7           |
| <b>1c</b> (P1c) | 2.9                            | -29.1          | 51.5           | -49.9          | 24.9           | -0.5           |
| <b>1c</b> (P2a) | 2.2                            | -26.0          | 50.2           | -52.4          | 29.8           | -4.1           |
| <b>1c</b> (P2b) | 2.8                            | -25.4          | 49.1           | -52.0          | 30.4           | -5.3           |
| <b>1c</b> (P2c) | 1.6                            | -25.8          | 50.4           | -52.6          | 29.5           | -3.4           |
| <b>1c</b> (P4a) | 2.6                            | -27.0          | 50.9           | -52.0          | 29.1           | -3.5           |
| <b>1c</b> (P4b) | 3.2                            | -25.9          | 49.4           | -51.7          | 30.4           | -5.3           |
| <b>1c</b> (P4c) | 1.8                            | -25.9          | 50.3           | -52.0          | 29.2           | -3.3           |
| <b>1c</b> (M1a) | -0.9                           | 25.3           | -50.8          | 52.7           | -29.1          | 2.9            |
| <b>1c</b> (M1b) | -2.1                           | 28.6           | -52.7          | 51.5           | -25.7          | 0.5            |
| <b>1c</b> (M1c) | -1.2                           | 25.4           | -50.7          | 52.7           | -29.0          | 3.0            |
| <b>1c</b> (M2a) | -0.4                           | 25.8           | -51.5          | 53.0           | -28.5          | 1.8            |
| <b>1c</b> (M2b) | -1.4                           | 28.6           | -53.4          | 52.4           | -26.1          | -0.1           |
| <b>1c</b> (M2c) | -1.3                           | 27.0           | -52.3          | 53.3           | -28.3          | 1.9            |
| <b>1c</b> (M3a) | -0.3                           | 26.2           | -52.4          | 53.9           | -28.8          | 1.7            |

---

|                |      |       |       |       |       |      |
|----------------|------|-------|-------|-------|-------|------|
| <b>1c(M3b)</b> | -1.6 | 29.8  | -54.7 | 52.9  | -25.3 | -0.8 |
| <b>1c(M3c)</b> | -0.9 | 26.3  | -52.0 | 53.5  | -28.8 | 2.2  |
| <b>1c(M4a)</b> | -0.3 | 27.1  | -53.0 | 53.0  | -27.1 | 0.1  |
| <b>1c(M4b)</b> | -1.6 | 30.7  | -55.2 | 51.7  | -23.3 | -2.6 |
| <b>1c(M4c)</b> | -0.9 | 27.3  | -52.8 | 52.8  | -27.1 | 0.6  |
| <b>1d(P1a)</b> | 0.8  | -23.8 | -48.0 | -50.8 | 29.2  | -3.4 |
| <b>1d(P1c)</b> | 1.2  | -24.0 | 47.9  | -50.4 | 28.7  | -3.5 |
| <b>1d(P1d)</b> | 1.7  | -27.0 | 50.2  | -49.9 | 26.1  | -1.1 |
| <b>1d(P2a)</b> | 1.4  | -22.8 | 47.6  | -52.5 | 32.4  | -6.3 |
| <b>1d(P2c)</b> | 1.3  | -22.5 | 47.5  | -52.4 | 32.0  | -6.2 |
| <b>1d(P2d)</b> | 1.6  | -26.4 | 51.2  | -52.9 | 29.4  | -3.1 |
| <b>1d(P3a)</b> | 1.7  | -24.2 | 48.5  | -52.0 | 30.9  | -5.0 |
| <b>1d(P4a)</b> | 1.8  | 24.2  | 49.1  | -52.7 | 31.8  | -5.7 |
| <b>1d(P4c)</b> | 2.4  | -25.0 | 49.4  | -52.1 | 30.5  | -5.2 |
| <b>1d(P4d)</b> | 2.4  | -27.5 | 52.0  | -52.7 | 29.1  | -3.1 |
| <b>1d(M1a)</b> | -2.2 | 26.2  | -50.6 | 51.9  | -28.7 | 3.5  |
| <b>1d(M1b)</b> | -2.7 | 30.8  | -54.7 | 51.5  | -24.2 | -0.9 |
| <b>1d(M1c)</b> | -3.2 | 29.6  | -53.4 | 51.8  | -26.1 | 1.3  |
| <b>1d(M2a)</b> | -1.2 | 26.1  | -51.3 | 52.6  | -28.7 | 2.6  |
| <b>1d(M2b)</b> | -2.2 | 31.7  | -55.5 | 51.3  | -22.8 | -2.6 |
| <b>1d(M2c)</b> | -2.5 | 29.7  | -53.9 | 52.0  | -25.5 | 0.1  |
| <b>1d(M3a)</b> | -1.4 | 27.0  | -52.6 | 53.7  | -28.9 | 2.4  |
| <b>1d(M3b)</b> | -0.5 | 28.1  | -54.4 | 54.1  | -27.2 | -0.0 |
| <b>1d(M3c)</b> | -3.0 | 30.6  | -55.1 | 53.2  | -26.1 | 0.5  |
| <b>1d(M4a)</b> | -1.3 | 27.8  | -53.0 | 52.5  | -26.9 | 0.7  |
| <b>1d(M4b)</b> | -0.5 | 28.5  | -54.0 | 52.3  | -25.1 | -1.5 |
| <b>1d(M4c)</b> | -2.7 | 31.7  | -55.7 | 51.7  | -23.5 | -1.8 |
| <b>1e(P1)</b>  | 0.4  | -22.8 | 48.1  | -51.6 | 30.3  | -4.2 |
| <b>1e(P2)</b>  | 0.7  | -21.6 | 47.8  | -53.2 | 33.1  | -6.8 |
| <b>1e(P4)</b>  | 1.3  | -22.7 | 48.5  | -52.9 | 32.7  | -6.6 |
| <b>1e(M2)</b>  | -3.4 | 32.3  | -56.0 | 51.6  | -23.7 | -1.2 |
| <b>1e(M3)</b>  | -3.9 | 33.7  | -57.2 | 51.6  | -22.6 | -2.0 |
| <b>1e(M4)</b>  | -3.4 | 33.5  | -57.2 | 51.3  | -22.1 | -2.8 |
| <b>2a(P1)</b>  | 1.6  | -24.4 | 50.1  | -54.8 | 33.2  | -6.1 |
| <b>2a(P2)</b>  | 0.2  | -21.2 | 49.1  | -57.2 | 37.2  | -8.6 |

---

---

|                |      |       |       |       |       |       |
|----------------|------|-------|-------|-------|-------|-------|
| <b>2a(P3)</b>  | 0.8  | -22.9 | 50.3  | -56.9 | 36.0  | -7.7  |
| <b>2a(P4)</b>  | 1.6  | -23.1 | 50.1  | -56.7 | 36.2  | -8.5  |
| <b>2a(M1)</b>  | 1.3  | 15.0  | -41.8 | 51.5  | -34.9 | 9.5   |
| <b>2a(M2)</b>  | 0.7  | 17.8  | -44.3 | 52.0  | -33.3 | 7.8   |
| <b>2a(M3)</b>  | 1.7  | 17.3  | -44.8 | 52.9  | -33.4 | 7.2   |
| <b>2a(M4)</b>  | 2.2  | 17.3  | -45.0 | 52.4  | -32.5 | 6.0   |
| <b>2b(P1)</b>  | 2.8  | -25.8 | 50.9  | -53.7 | 31.7  | -6.0  |
| <b>2b(P3)</b>  | 2.1  | -24.1 | 51.1  | -56.2 | 35.2  | -8.1  |
| <b>2b(P4)</b>  | 2.6  | -25.3 | 52.0  | -56.1 | 34.5  | -7.6  |
| <b>2b(M1)</b>  | 1.7  | 15.6  | -42.9 | 51.5  | -34.1 | 8.5   |
| <b>2b(M2)</b>  | 1.8  | 18.6  | -45.4 | 51.8  | -32.1 | 5.5   |
| <b>2b(M3)</b>  | 1.6  | 18.5  | -45.9 | 52.0  | -31.7 | 5.8   |
| <b>2b(M4)</b>  | 1.6  | 19.5  | -46.7 | 51.4  | -30.1 | 4.2   |
| <b>2c(P1a)</b> | 2.9  | -24.5 | 50.6  | -55.5 | 34.9  | -8.6  |
| <b>2c(P1b)</b> | 1.6  | -27.0 | 52.8  | -53.7 | 29.4  | -3.1  |
| <b>2c(P1c)</b> | -0.3 | -24.4 | 51.6  | -55.1 | 31.3  | -3.4  |
| <b>2c(P2a)</b> | 2.2  | -22.0 | 50.1  | -58.1 | 39.0  | -11.5 |
| <b>2c(P2b)</b> | 1.9  | -24.1 | 51.4  | -56.5 | 35.3  | -8.1  |
| <b>2c(P2c)</b> | 0.1  | -24.1 | 52.1  | -56.8 | 33.9  | -5.3  |
| <b>2c(P3b)</b> | 1.9  | -24.2 | 51.0  | -55.5 | 34.4  | -7.5  |
| <b>2c(P4a)</b> | 2.9  | -23.0 | 50.7  | -57.9 | 38.8  | -11.5 |
| <b>2c(P4b)</b> | 2.5  | -25.4 | 52.1  | -55.6 | 33.9  | -7.1  |
| <b>2c(P4c)</b> | 1.8  | -26.9 | 53.7  | -56.1 | 32.4  | -4.8  |
| <b>2c(M1a)</b> | 0.0  | 16.5  | -44.0 | 53.2  | -36.3 | 11.0  |
| <b>2c(M1b)</b> | 0.8  | 18.4  | -44.0 | 48.7  | -29.5 | 5.5   |
| <b>2c(M2a)</b> | 0.7  | 16.0  | -44.3 | 54.3  | -37.3 | 11.1  |
| <b>2c(M2b)</b> | 1.9  | 16.4  | -44.0 | 51.9  | -33.8 | 7.8   |
| <b>2c(M3a)</b> | 0.8  | 17.4  | -46.0 | 54.6  | -35.8 | 9.4   |
| <b>2c(M3b)</b> | 2.2  | 17.4  | -46.3 | 53.6  | -33.7 | 6.9   |
| <b>2c(M3c)</b> | 3.8  | 14.0  | -40.9 | 48.3  | -29.9 | 5.0   |
| <b>2c(M4a)</b> | 0.9  | 17.9  | -46.2 | 54.0  | -34.8 | 8.5   |
| <b>2c(M4b)</b> | 3.1  | 15.4  | -44.6 | 53.2  | -34.8 | 7.6   |
| <b>2c(M4c)</b> | 4.4  | 1.3   | -40.2 | 47.7  | -29.6 | 4.6   |
| <b>3a(P1)</b>  | 0.4  | -24.4 | 49.0  | -51.2 | 28.0  | -2.1  |
| <b>3a(P2)</b>  | 0.8  | -22.4 | 47.7  | -52.6 | 31.8  | -5.8  |

---

---

|                |      |       |       |       |       |      |
|----------------|------|-------|-------|-------|-------|------|
| <b>3a(P3)</b>  | 1.1  | -22.8 | 47.9  | -52.5 | 31.7  | -5.7 |
| <b>3a(P4)</b>  | 1.7  | -23.4 | 47.9  | -52.0 | 31.3  | -5.8 |
| <b>3a(M1)</b>  | -0.7 | 21.4  | -47.8 | 53.4  | -32.9 | 7.0  |
| <b>3a(M2)</b>  | -0.6 | 22.9  | -49.5 | 54.3  | -32.4 | 5.8  |
| <b>3a(M3)</b>  | 0.5  | 20.9  | -48.5 | 54.8  | -33.8 | 6.5  |
| <b>3a(M4)</b>  | 0.4  | 22.9  | -50.2 | 53.9  | -30.9 | 3.9  |
| <b>3b(P1)</b>  | 1.8  | -26.2 | 49.9  | -49.9 | 26.2  | -1.8 |
| <b>3b(P2)</b>  | 2.6  | -24.9 | 49.3  | -51.8 | 30.1  | -5.5 |
| <b>3b(P3)</b>  | 2.2  | -22.4 | 49.0  | -51.5 | 30.0  | -5.1 |
| <b>3b(P4)</b>  | 2.7  | -25.0 | 49.4  | -51.5 | 30.0  | -5.4 |
| <b>3b(M1)</b>  | -0.5 | 23.0  | -49.7 | 53.2  | -31.2 | 5.2  |
| <b>3b(M2)</b>  | 0.3  | 22.6  | -49.9 | 53.5  | -31.2 | 4.5  |
| <b>3b(M4)</b>  | 0.1  | 25.0  | -52.0 | 53.0  | -28.5 | 1.8  |
| <b>3c(P1a)</b> | 2.2  | -23.5 | 49.3  | -53.7 | 32.9  | -7.2 |
| <b>3c(P1b)</b> | 2.1  | -28.0 | 47.0  | -41.0 | 25.7  | -4.4 |
| <b>3c(P1c)</b> | 2.1  | -23.1 | 48.8  | -49.7 | 27.6  | -3.5 |
| <b>3c(P2a)</b> | 1.9  | -21.1 | 46.9  | -53.3 | 34.4  | -9.0 |
| <b>3c(P2b)</b> | 2.3  | -25.6 | 46.6  | -44.7 | 21.7  | -0.4 |
| <b>3c(P2c)</b> | 2.0  | -24.1 | 49.2  | -52.3 | 30.8  | -5.8 |
| <b>3c(P3a)</b> | 2.8  | -23.9 | 49.6  | -53.9 | 33.3  | -7.8 |
| <b>3c(P3c)</b> | 2.0  | -24.2 | 48.8  | -51.3 | 30.0  | -5.2 |
| <b>3c(P4a)</b> | 3.4  | -23.2 | 48.8  | -54.1 | 35.0  | -9.8 |
| <b>3c(P4b)</b> | 2.7  | -26.7 | 46.7  | -42.8 | 29.3  | 1.2  |
| <b>3c(P4c)</b> | 2.0  | -24.3 | 48.9  | -51.0 | 29.6  | -4.9 |
| <b>3c(M1a)</b> | -1.3 | 21.2  | -48.6 | 54.7  | -35.4 | 9.3  |
| <b>3c(M1b)</b> | 0.2  | 24.7  | -51.5 | 52.9  | -28.6 | 2.1  |
| <b>3c(M1c)</b> | -0.0 | 21.9  | -49.6 | 54.1  | -32.7 | 6.2  |
| <b>3c(M2a)</b> | -0.5 | 21.4  | -49.5 | 55.4  | -35.2 | 8.2  |
| <b>3c(M2b)</b> | 0.7  | 24.4  | -51.2 | 52.7  | -28.4 | 1.7  |
| <b>3c(M2c)</b> | -0.2 | 24.1  | -51.5 | 54.1  | -30.6 | 4.0  |
| <b>3c(M3a)</b> | -0.5 | 21.8  | -50.1 | 55.9  | -35.2 | 8.0  |
| <b>3c(M3c)</b> | 0.6  | 23.2  | -51.4 | 54.8  | -31.5 | 4.1  |
| <b>3c(M4a)</b> | -0.8 | 24.0  | -51.9 | 55.2  | -32.6 | 5.6  |
| <b>3c(M4b)</b> | 1.8  | 24.2  | -51.8 | 53.4  | -28.7 | 1.4  |
| <b>3c(M4c)</b> | 0.8  | 24.4  | -52.4 | 53.9  | -29.2 | 2.1  |

---

|             |     |      |       |      |       |     |
|-------------|-----|------|-------|------|-------|-----|
| <b>4(M)</b> | 3.1 | 19.4 | -46.3 | 52.6 | -31.2 | 3.0 |
|-------------|-----|------|-------|------|-------|-----|

[a] C<sub>1</sub> = τ; C<sub>2</sub> = C2=C3-C4-C5; C<sub>3</sub> = C3-C4-C5-C6; C<sub>4</sub> = C4-C5-C6-C1; C<sub>5</sub> = C5-C6-C1-C2; C<sub>6</sub> = C6-C1-C2=C3

**Table B3.** Structural parameters that characterize low-energy conformers of **1a**, **1b** and **1c** calculated at the PCM(MeCN)/MP2/6-311G(d,p) level.

| Diol          | OH...O<br>[Å] | Torsion angle<br>[°] |                |                | φ <sup>d</sup> |
|---------------|---------------|----------------------|----------------|----------------|----------------|
|               |               | α <sup>a</sup>       | β <sup>b</sup> | ω <sup>c</sup> |                |
| <b>1a(P1)</b> | 2.179         | -160.0               | -175.3         | 178.5          |                |
| <b>1a(P2)</b> | 2.110         | -161.9               | -40.0          | 172.9          |                |
| <b>1a(P3)</b> | 2.124         | 62.6                 | 76.1           | 172.5          |                |
| <b>1a(P4)</b> | 2.153         | -42.9                | 79.1           | 172.2          |                |
| <b>1a(M1)</b> | 2.180         | 159.1                | 161.7          | -172.9         |                |
| <b>1a(M2)</b> | 2.150         | 43.0                 | 163.2          | -174.1         |                |
| <b>1a(M3)</b> | 2.168         | -71.2                | -72.7          | -174.9         |                |
| <b>1a(M4)</b> | 2.187         | -74.3                | 43.3           | -175.4         |                |
| <b>1b(P1)</b> | 2.181         | -160.2               | -175.5         | 178.5          |                |
| <b>1b(P2)</b> | 2.111         | -161.7               | -41.2          | 173.0          |                |
| <b>1b(P4)</b> | 2.156         | -41.6                | 77.8           | 172.3          |                |
| <b>1b(M1)</b> | 2.201         | 160.6                | 162.5          | -174.1         |                |
| <b>1b(M2)</b> | 2.167         | 29.9                 | 164.1          | -174.9         |                |
| <b>1b(M3)</b> | 2.175         | -71.0                | -72.9          | -175.7         |                |
| <b>1b(M4)</b> | 2.193         | -74.4                | 43.6           | -176.0         |                |
| <b>1e(P1)</b> | 2.133         | -157.5               | -177.3         | 177.5          | -14.5          |
| <b>1e(P2)</b> | 2.067         | -159.2               | -40.8          | 171.9          | -17.0          |
| <b>1e(P4)</b> | 2.135         | -47.7                | 76.9           | 171.1          | -17.4          |
| <b>1e(M1)</b> | 2.229         | 154.9                | 165.9          | -175.9         | 11.1           |
| <b>1e(M2)</b> | 2.202         | 37.5                 | 166.2          | -176.6         | 12.5           |
| <b>1e(M3)</b> | 2.195         | -69.0                | -75.0          | -177.8         | 11.5           |
| <b>1e(M4)</b> | 2.211         | -71.8                | 45.5           | -178.1         | 11.6           |

[a] H-C4-O-H; [b] H-C5-O-H; [c] C3-C2-C1=O; [d] φ = C2=C3-C-C(H<sub>3</sub>).

**Table B4.** Values of intra-ring torsion angles that characterize the low-energy conformers of **1a**, **1b** and **1c** calculated at the PCM(MeCN)/MP2/6-311G(d,p) level.

| Diol | Torsion angle <sup>a</sup> [°] |                |                |                |                |                |
|------|--------------------------------|----------------|----------------|----------------|----------------|----------------|
|      | C <sub>1</sub>                 | C <sub>2</sub> | C <sub>3</sub> | C <sub>4</sub> | C <sub>5</sub> | C <sub>6</sub> |

|               |      |       |       |       |       |       |
|---------------|------|-------|-------|-------|-------|-------|
| <b>1a(P1)</b> | -0.1 | -25.0 | 51.7  | -55.8 | 30.8  | -2.6  |
| <b>1a(P2)</b> | 0.0  | -20.7 | 49.2  | -58.5 | 37.6  | -8.6  |
| <b>1a(P3)</b> | 0.4  | -20.9 | 49.2  | -58.5 | 38.4  | -9.3  |
| <b>1a(P4)</b> | 0.9  | -21.6 | 49.0  | -58.0 | 38.2  | -9.7  |
| <b>1a(M1)</b> | -1.2 | 22.5  | -49.7 | 57.0  | -36.1 | 8.2   |
| <b>1a(M2)</b> | -0.6 | 23.6  | -51.5 | 58.4  | -36.0 | 7.0   |
| <b>1a(M3)</b> | 0.2  | 23.0  | -51.8 | 59.1  | -36.0 | 6.5   |
| <b>1a(M4)</b> | 0.2  | 23.0  | -51.5 | 58.2  | -35.3 | 6.1   |
| <b>1b(P1)</b> | 0.9  | -26.1 | 52.6  | -55.2 | 30.1  | -2.7  |
| <b>1b(P2)</b> | 1.5  | -22.3 | 49.9  | -57.4 | 36.5  | -8.8  |
| <b>1b(P4)</b> | 1.8  | -22.0 | 49.5  | -57.2 | 37.5  | -9.9  |
| <b>1b(M1)</b> | -1.5 | 24.1  | -50.9 | 56.2  | -34.5 | 7.0   |
| <b>1b(M2)</b> | -0.4 | 24.1  | -52.0 | 57.8  | -35.2 | 6.3   |
| <b>1b(M3)</b> | 0.0  | 23.8  | -52.4 | 58.2  | -34.9 | 5.9   |
| <b>1b(M4)</b> | 0.1  | 23.5  | -51.9 | 57.5  | -34.6 | 5.6   |
| <b>1e(P1)</b> | 0.0  | -24.0 | 52.2  | -56.1 | 31.9  | -4.1  |
| <b>1e(P2)</b> | 0.3  | -19.6 | 49.0  | -58.3 | 38.6  | -10.4 |
| <b>1e(P4)</b> | 0.8  | -19.5 | 48.8  | -58.3 | 38.6  | -11.5 |
| <b>1e(M1)</b> | -3.8 | 29.7  | -55.0 | 54.8  | -29.9 | 4.0   |
| <b>1e(M2)</b> | -2.6 | 29.2  | -55.6 | 56.3  | -30.9 | 3.6   |
| <b>1e(M3)</b> | -2.3 | 29.6  | -56.5 | 56.4  | -29.9 | 2.6   |
| <b>1e(M4)</b> | -2.1 | 293.1 | -55.8 | 5.7   | -29.5 | 2.3   |

[a] C<sub>1</sub> = τ; C<sub>2</sub> = C2=C3-C4-C5; C<sub>3</sub> = C3-C4-C5-C6; C<sub>4</sub> = C4-C5-C6-C1; C<sub>5</sub> = C5-C6-C1-C2;  
C<sub>6</sub> = C6-C1-C2=C3



**Table C.** Specific optical rotations for *cis*-ketodiols **1-4**, calculated at the IEFPCM/B3LYP/Aug-cc-pVTZ level and measured in methanol solution.

| Diol                                              | Conformer | Calculated optical rotations |           |           |           | Measured optical rotations |           |           |           |
|---------------------------------------------------|-----------|------------------------------|-----------|-----------|-----------|----------------------------|-----------|-----------|-----------|
|                                                   |           | 589<br>nm                    | 578<br>nm | 546<br>nm | 436<br>nm | 589<br>nm                  | 578<br>nm | 546<br>nm | 436<br>nm |
| <b>1a</b>                                         | (P1)      | -422                         | -544      | -637      | -1269     |                            |           |           |           |
|                                                   | (P2)      | -259                         | -365      | -432      | -930      |                            |           |           |           |
|                                                   | (P3)      | -367                         | -462      | -534      | -980      |                            |           |           |           |
|                                                   | (P4)      | -293                         | -391      | -455      | -857      |                            |           |           |           |
|                                                   | (M1)      | -159                         | -107      | -111      | -11       |                            |           |           |           |
|                                                   | (M2)      | -119                         | -98       | -105      | -63       |                            |           |           |           |
|                                                   | (M3)      | -56                          | -41       | -39       | +66       |                            |           |           |           |
|                                                   | (M4)      | -105                         | -131      | -148      | -234      |                            |           |           |           |
| <b><math>\Delta E^a</math> Boltzmann averaged</b> |           | -255                         | -329      | -383      | -716      | -217                       | -227      | -261      | -465      |
| <b>1b</b>                                         | (P1)      | -236                         | -288      | -335      | -635      |                            |           |           |           |
|                                                   | (P2)      | -120                         | -174      | -206      | -444      |                            |           |           |           |
|                                                   | (P3)      | -166                         | -225      | -261      | -475      |                            |           |           |           |
|                                                   | (P4)      | -128                         | -178      | -206      | -380      |                            |           |           |           |
|                                                   | (M1)      | -98                          | -58       | -60       | +1        |                            |           |           |           |
|                                                   | (M2)      | -59                          | -44       | -46       | -3        |                            |           |           |           |
|                                                   | (M3)      | +6                           | +13       | +20       | +121      |                            |           |           |           |
|                                                   | (M4)      | -30                          | -58       | -67       | -114      |                            |           |           |           |
| <b><math>\Delta E</math> Boltzmann averaged</b>   |           | -103                         | -140      | -162      | -287      | -119                       | -124      | -141      | -237      |
| <b>1c</b>                                         | (P1a)     | -197                         | -241      | -280      | -523      |                            |           |           |           |
|                                                   | (P1b)     | -135                         | -251      | -292      | -567      |                            |           |           |           |
|                                                   | (P1c)     | -282                         | -259      | -299      | -531      |                            |           |           |           |
|                                                   | (P2a)     | -93                          | -138      | -163      | -345      |                            |           |           |           |
|                                                   | (P2b)     | -46                          | -158      | -189      | -437      |                            |           |           |           |
|                                                   | (P2c)     | -187                         | -163      | -190      | -377      |                            |           |           |           |
|                                                   | (P3a)     | -160                         | -210      | -241      | -419      |                            |           |           |           |
|                                                   | (P4a)     | -94                          | -143      | -167      | -317      |                            |           |           |           |
|                                                   | (P4b)     | -87                          | -202      | -237      | -469      |                            |           |           |           |
|                                                   | (P4c)     | -195                         | -176      | -203      | -350      |                            |           |           |           |
|                                                   | (M1a)     | -81                          | -36       | -35       | +37       |                            |           |           |           |
|                                                   | (M1b)     | +79                          | +56       | +68       | +184      |                            |           |           |           |
|                                                   | (M1c)     | -142                         | -44       | -44       | +40       |                            |           |           |           |

|                                                 |      |      |      |      |      |      |      |      |
|-------------------------------------------------|------|------|------|------|------|------|------|------|
| (M2a)                                           | -41  | -22  | -21  | +30  |      |      |      |      |
| (M2b)                                           | +116 | +72  | +85  | +191 |      |      |      |      |
| (M2c)                                           | -97  | -19  | -16  | +61  |      |      |      |      |
| (M3a)                                           | +14  | +25  | +33  | +131 |      |      |      |      |
| (M3b)                                           | +156 | +103 | +120 | +245 |      |      |      |      |
| (M3c)                                           | -50  | +21  | +30  | +150 |      |      |      |      |
| (M4a)                                           | -26  | -47  | -54  | -93  |      |      |      |      |
| (M4b)                                           | +122 | +35  | +38  | +20  |      |      |      |      |
| (M4c)                                           | -90  | -50  | -57  | -80  |      |      |      |      |
| <b><math>\Delta E</math> Boltzmann averaged</b> | -82  | -88  | -101 | -168 | -103 | -107 | -123 | -201 |
| <b>1d</b> (P1c)                                 | -167 | -225 | -264 | -525 |      |      |      |      |
| (P1d)                                           | -257 | -230 | -264 | -451 |      |      |      |      |
| (P2a)                                           | -26  | -118 | -142 | -349 |      |      |      |      |
| (P2c)                                           | -77  | -131 | -158 | -389 |      |      |      |      |
| (P2d)                                           | -164 | -134 | -156 | -304 |      |      |      |      |
| (P3a)                                           | -108 | -208 | -242 | -473 |      |      |      |      |
| (P4a)                                           | -56  | -162 | -191 | -401 |      |      |      |      |
| (P4c)                                           | -111 | -172 | -202 | -417 |      |      |      |      |
| (P4d)                                           | -187 | -163 | -186 | -306 |      |      |      |      |
| (M1a)                                           | -112 | -18  | -14  | +85  |      |      |      |      |
| (M1b)                                           | +110 | +80  | +95  | +216 |      |      |      |      |
| (M1c)                                           | +7   | +49  | +61  | +195 |      |      |      |      |
| (M2a)                                           | -88  | -12  | -9   | +65  |      |      |      |      |
| (M2b)                                           | +155 | +120 | +140 | +284 |      |      |      |      |
| (M2c)                                           | +38  | +68  | +82  | +214 |      |      |      |      |
| (M3a)                                           | -44  | +22  | +30  | +136 |      |      |      |      |
| (M3b)                                           | +180 | +120 | +136 | +224 |      |      |      |      |
| (M3c)                                           | +79  | +96  | +114 | +263 |      |      |      |      |
| (M4a)                                           | -84  | -45  | -51  | -74  |      |      |      |      |
| (M4b)                                           | +137 | +61  | +67  | +75  |      |      |      |      |
| (M4c)                                           | +44  | +32  | +36  | +56  |      |      |      |      |
| <b><math>\Delta E</math> Boltzmann averaged</b> | -72  | -62  | -71  | -112 | -79  | -82  | -94  | -150 |
| <b>1e</b> (P1)                                  | -119 | -173 | -203 | -412 |      |      |      |      |
| (P2)                                            | -43  | -92  | -113 | -300 |      |      |      |      |
| (P4)                                            | -78  | -133 | -158 | -345 |      |      |      |      |

|           |                                                 |      |      |      |      |                   |                   |                   |                   |
|-----------|-------------------------------------------------|------|------|------|------|-------------------|-------------------|-------------------|-------------------|
|           | (M1)                                            | +30  | +71  | +86  | +228 |                   |                   |                   |                   |
|           | (M2)                                            | +63  | +94  | +111 | +249 |                   |                   |                   |                   |
|           | (M4)                                            | +58  | +49  | +56  | +83  |                   |                   |                   |                   |
|           | <b><math>\Delta E</math> Boltzmann averaged</b> | +51  | +63  | +74  | +151 | -9                | -9                | -10               | -17               |
| <b>2a</b> | (P1)                                            | -321 | -408 | -480 | -999 |                   |                   |                   |                   |
|           | (P2)                                            | -300 | -382 | -450 | -943 |                   |                   |                   |                   |
|           | (P3)                                            | -296 | -364 | -424 | -827 |                   |                   |                   |                   |
|           | (P4)                                            | -220 | -292 | -343 | -693 |                   |                   |                   |                   |
|           | (M1)                                            | -109 | +6   | +17  | +196 |                   |                   |                   |                   |
|           | (M2)                                            | -171 | -73  | -74  | +25  |                   |                   |                   |                   |
|           | (M3)                                            | -36  | +40  | +53  | +207 |                   |                   |                   |                   |
|           | (M4)                                            | -87  | -48  | -53  | -66  |                   |                   |                   |                   |
|           | <b><math>\Delta E</math> Boltzmann averaged</b> | -264 | -340 | -399 | -814 | +223 <sup>b</sup> | +234 <sup>b</sup> | +273 <sup>b</sup> | +540 <sup>b</sup> |
| <b>2b</b> | (P1)                                            | -183 | -210 | -246 | -498 |                   |                   |                   |                   |
|           | (P2)                                            | -127 | -155 | -185 | -425 |                   |                   |                   |                   |
|           | (P4)                                            | -88  | -120 | -142 | -303 |                   |                   |                   |                   |
|           | (M1)                                            | -75  | +33  | +46  | +210 |                   |                   |                   |                   |
|           | (M2)                                            | -101 | -19  | -15  | +88  |                   |                   |                   |                   |
|           | (M3)                                            | +18  | +93  | +113 | +298 |                   |                   |                   |                   |
|           | (M4)                                            | -34  | +4   | +6   | +41  |                   |                   |                   |                   |
|           | <b><math>\Delta E</math> Boltzmann averaged</b> | -105 | -135 | -161 | -352 | +94 <sup>b</sup>  | +98 <sup>b</sup>  | +116 <sup>b</sup> | +237 <sup>b</sup> |
| <b>2c</b> | (P1a)                                           | -159 | -224 | -267 | -607 |                   |                   |                   |                   |
|           | (P1b)                                           | -183 | -223 | -259 | -482 |                   |                   |                   |                   |
|           | (P2c)                                           | -192 | -174 | -201 | -360 |                   |                   |                   |                   |
|           | (P2a)                                           | -99  | -161 | -196 | -507 |                   |                   |                   |                   |
|           | (P2b)                                           | -163 | -202 | -236 | -479 |                   |                   |                   |                   |
|           | (P2c)                                           | -161 | -141 | -165 | -328 |                   |                   |                   |                   |
|           | (P3b)                                           | -91  | -142 | -166 | -328 |                   |                   |                   |                   |
|           | (P3c)                                           | -110 | -97  | -112 | -189 |                   |                   |                   |                   |
|           | (P4a)                                           | -60  | -152 | -153 | -394 |                   |                   |                   |                   |
|           | (P4b)                                           | -93  | -141 | -164 | -318 |                   |                   |                   |                   |
|           | (P4c)                                           | -110 | -97  | -112 | -190 |                   |                   |                   |                   |
|           | (M1a)                                           | -56  | +104 | +133 | +449 |                   |                   |                   |                   |
|           | (M1b)                                           | -6   | +52  | +65  | +202 |                   |                   |                   |                   |
|           | (M2a)                                           | -84  | +48  | +66  | +307 |                   |                   |                   |                   |

|                                                 |      |      |      |       |                   |                   |                   |                   |
|-------------------------------------------------|------|------|------|-------|-------------------|-------------------|-------------------|-------------------|
| (M2b)                                           | -56  | -14  | -11  | +79   |                   |                   |                   |                   |
| (M2c)                                           | -65  | -27  | -32  | -55   |                   |                   |                   |                   |
| (M3a)                                           | +32  | +160 | +195 | +518  |                   |                   |                   |                   |
| (M3b)                                           | +31  | +54  | +67  | +203  |                   |                   |                   |                   |
| (M3c)                                           | -65  | -28  | -33  | -58   |                   |                   |                   |                   |
| (M4a)                                           | -15  | +83  | +103 | +307  |                   |                   |                   |                   |
| (M4b)                                           | -20  | -23  | -24  | -8    |                   |                   |                   |                   |
| (M4c)                                           | -105 | -99  | -117 | -257  |                   |                   |                   |                   |
| <b><math>\Delta E</math> Boltzmann averaged</b> | -96  | -144 | -168 | -377  | +104 <sup>b</sup> | +109 <sup>b</sup> | +128 <sup>b</sup> | +259 <sup>b</sup> |
| <b>3a</b> (P1)                                  | -364 | -506 | -588 | -1108 |                   |                   |                   |                   |
| (P2)                                            | -221 | -352 | -412 | -829  |                   |                   |                   |                   |
| (P3)                                            | -329 | -445 | -512 | -897  |                   |                   |                   |                   |
| (P4)                                            | -263 | -391 | -451 | -811  |                   |                   |                   |                   |
| (M1)                                            | -190 | -184 | -200 | -170  |                   |                   |                   |                   |
| (M2)                                            | -224 | -229 | -252 | -271  |                   |                   |                   |                   |
| (M3)                                            | -115 | -134 | -144 | -111  |                   |                   |                   |                   |
| (M4)                                            | -130 | -187 | -211 | -326  |                   |                   |                   |                   |
| <b><math>\Delta E</math> Boltzmann averaged</b> | -239 | -337 | -387 | -677  |                   |                   |                   |                   |
| <b>3b</b> (P1)                                  | -225 | -319 | -368 | -656  |                   |                   |                   |                   |
| (P2)                                            | -140 | -233 | -272 | -535  |                   |                   |                   |                   |
| (P4)                                            | -139 | -239 | -276 | -491  |                   |                   |                   |                   |
| (M1)                                            | -158 | -162 | -179 | -200  |                   |                   |                   |                   |
| (M2)                                            | -103 | -129 | -142 | -162  |                   |                   |                   |                   |
| (M3)                                            | -74  | -100 | -108 | -88   |                   |                   |                   |                   |
| (M4)                                            | -87  | -148 | -167 | -271  |                   |                   |                   |                   |
| <b><math>\Delta E</math> Boltzmann averaged</b> | -121 | -185 | -211 | -343  |                   |                   |                   |                   |
| <b>3c</b> (P1a)                                 | -169 | -321 | -374 | -745  |                   |                   |                   |                   |
| (P1b)                                           | -166 | -192 | -214 | -263  |                   |                   |                   |                   |
| (P1c)                                           | -212 | -271 | -312 | -542  |                   |                   |                   |                   |
| (P2a)                                           | -112 | -271 | -321 | -707  |                   |                   |                   |                   |
| (P2b)                                           | -95  | -127 | -143 | -198  |                   |                   |                   |                   |
| (P2c)                                           | -126 | -183 | -213 | -418  |                   |                   |                   |                   |
| (P3a)                                           | -170 | -325 | -378 | -745  |                   |                   |                   |                   |
| (P3c)                                           | -161 | -220 | -253 | -440  |                   |                   |                   |                   |
| (P4a)                                           | -116 | -286 | -336 | -698  |                   |                   |                   |                   |

|                                                 |          |          |          |           |
|-------------------------------------------------|----------|----------|----------|-----------|
| (P4b)                                           | -88      | -138     | -153     | -167      |
| (P4c)                                           | -132     | -186     | -214     | -363      |
| (M1a)                                           | -183     | -150     | -160     | -101      |
| (M1b)                                           | -121     | -174     | -197     | -297      |
| (M1c)                                           | -101     | -73      | -79      | -55       |
| (M2a)                                           | -196     | -177     | -192     | -163      |
| (M2b)                                           | -72      | -142     | -162     | -262      |
| (M3c)                                           | -89      | -75      | -81      | -61       |
| (M3a)                                           | -105     | -102     | -107     | -41       |
| (M3c)                                           | -18      | -18      | -16      | +42       |
| (M4b)                                           | -54      | -151     | -175     | -337      |
| (M4c)                                           | -30      | -59      | -68      | -118      |
| <b><math>\Delta E</math> Boltzmann averaged</b> | -108     | -151     | -171     | -248      |
| <b>4</b> (P,M)                                  | $\pm 53$ | $\pm 75$ | $\pm 87$ | $\pm 173$ |

---

[a] relative energies calculated at PCM/MP2/Aug-cc-pVTZ level for structures optimized at PCM/B3LYP/6-311++G(2d,2p) level; [b] measured for enantiomer

**Table D.** Rotatory strengths and excitation energies calculated at the PCM/B2LYP/6-311++G(2d,2p) level for *P*-type conformers of model compounds **4-23** with varying torsion angles  $\omega$  and  $\tau$ .

| Compound | Angle [°] |        | 1 <sup>st</sup> transition (n- $\pi^*$ ) |                | 2 <sup>nd</sup> transition ( $\pi$ - $\pi^*$ ) |                | 3 <sup>rd</sup> transition ( $\pi$ - $\sigma^*$ ) |                |
|----------|-----------|--------|------------------------------------------|----------------|------------------------------------------------|----------------|---------------------------------------------------|----------------|
|          | $\omega$  | $\tau$ | $R^a$                                    | $\lambda$ [nm] | $R^a$                                          | $\lambda$ [nm] | $R^a$                                             | $\lambda$ [nm] |
| 4        | -175      | -5     | -2.3036                                  | 282.77         | 38.4577                                        | 210.52         | -4.7642                                           | 176.63         |
| 4        | -175      | -4     | -0.7182                                  | 282.74         | 27.7952                                        | 210.2          | -7.2085                                           | 176.51         |
| 4        | -175      | -3     | 0.8917                                   | 282.72         | 16.8432                                        | 209.96         | -9.8075                                           | 176.43         |
| 4        | -175      | -2     | 2.5156                                   | 282.7          | 6.2868                                         | 209.81         | -12.4814                                          | 176.4          |
| 4        | -175      | -1     | 4.1376                                   | 282.68         | -4.3035                                        | 209.75         | -15.0086                                          | 176.42         |
| 4        | -175      | 0      | 5.8482                                   | 282.66         | -14.5094                                       | 209.78         | -17.3719                                          | 176.49         |
| 4        | -175      | 1      | 7.5914                                   | 282.63         | -24.2454                                       | 209.9          | -19.2077                                          | 176.62         |
| 4        | -175      | 2      | 9.3639                                   | 282.57         | -33.3122                                       | 210.14         | -20.1758                                          | 176.82         |
| 4        | -175      | 3      | 11.1847                                  | 282.51         | -41.4683                                       | 210.5          | -19.3049                                          | 177.09         |
| 4        | -175      | 4      | 13.0399                                  | 282.43         | -48.2944                                       | 211.02         | -4.4607                                           | 177.47         |
| 4        | -175      | 5      | 14.9507                                  | 282.33         | -53.7894                                       | 211.74         | -51.0585                                          | 180.54         |
| 4        | -176      | -5     | -2.5053                                  | 283.02         | 40.6438                                        | 210.57         | -5.2391                                           | 176.64         |
| 4        | -176      | -4     | -0.9701                                  | 282.98         | 29.8247                                        | 210.23         | -7.7166                                           | 176.52         |
| 4        | -176      | -3     | 0.625                                    | 282.95         | 18.8124                                        | 209.97         | -10.305                                           | 176.43         |
| 4        | -176      | -2     | 2.236                                    | 282.93         | 7.9943                                         | 209.8          | -13.0334                                          | 176.4          |
| 4        | -176      | -1     | 3.8418                                   | 282.91         | -2.536                                         | 209.72         | -15.6798                                          | 176.41         |
| 4        | -176      | 0      | 5.4865                                   | 282.89         | -13.0424                                       | 209.72         | -18.0846                                          | 176.47         |
| 4        | -176      | 1      | 7.2265                                   | 282.85         | -23.1559                                       | 209.81         | -20.1579                                          | 176.59         |
| 4        | -176      | 2      | 8.9675                                   | 282.82         | -32.6747                                       | 210.01         | -21.5224                                          | 176.77         |
| 4        | -176      | 3      | 10.7693                                  | 282.76         | -41.4475                                       | 210.31         | -21.8347                                          | 177.02         |
| 4        | -176      | 4      | 12.5915                                  | 282.68         | -49.1018                                       | 210.75         | -19.559                                           | 177.34         |
| 4        | -176      | 5      | 14.4867                                  | 282.59         | -55.4533                                       | 211.35         | 9.4042                                            | 177.9          |
| 4        | -177      | -5     | -2.6919                                  | 283.26         | 42.8848                                        | 210.64         | -5.7667                                           | 176.66         |
| 4        | -177      | -4     | -1.184                                   | 283.21         | 32.0139                                        | 210.27         | -8.2408                                           | 176.53         |
| 4        | -177      | -3     | 0.3531                                   | 283.18         | 21.03                                          | 210            | -10.8929                                          | 176.45         |
| 4        | -177      | -2     | 1.943                                    | 283.15         | 9.8518                                         | 209.81         | -13.5857                                          | 176.41         |
| 4        | -177      | -1     | 3.5657                                   | 283.13         | -0.8924                                        | 209.7          | -16.3119                                          | 176.41         |
| 4        | -177      | 0      | 5.1679                                   | 283.1          | -11.4967                                       | 209.68         | -18.7971                                          | 176.47         |
| 4        | -177      | 1      | 6.8351                                   | 283.07         | -21.7756                                       | 209.75         | -20.9405                                          | 176.58         |
| 4        | -177      | 2      | 8.6015                                   | 283.03         | -31.7116                                       | 209.91         | -22.6009                                          | 176.75         |
| 4        | -177      | 3      | 10.369                                   | 282.98         | -40.9794                                       | 210.17         | -23.4336                                          | 176.98         |

|   |      |    |         |        |          |        |          |        |
|---|------|----|---------|--------|----------|--------|----------|--------|
| 4 | -177 | 4  | 12.1666 | 282.91 | -49.315  | 210.55 | -22.9604 | 177.27 |
| 4 | -177 | 5  | 14.0096 | 282.82 | -56.5242 | 211.05 | -18.6965 | 177.64 |
| 4 | -178 | -5 | -2.8839 | 283.5  | 45.1557  | 210.71 | -6.3333  | 176.69 |
| 4 | -178 | -4 | -1.3924 | 283.44 | 34.2812  | 210.33 | -8.8077  | 176.56 |
| 4 | -178 | -3 | 0.1164  | 283.39 | 23.2281  | 210.04 | -11.4578 | 176.47 |
| 4 | -178 | -2 | 1.6664  | 283.36 | 12.1239  | 209.83 | -14.1971 | 176.42 |
| 4 | -178 | -1 | 3.265   | 283.33 | 0.8917   | 209.71 | -16.9147 | 176.42 |
| 4 | -178 | 0  | 4.8559  | 283.3  | -9.8408  | 209.67 | -19.4636 | 176.48 |
| 4 | -178 | 1  | 6.503   | 283.27 | -20.2842 | 209.72 | -21.7131 | 176.58 |
| 4 | -178 | 2  | 8.1999  | 283.24 | -30.4406 | 209.85 | -23.4631 | 176.74 |
| 4 | -178 | 3  | 9.983   | 283.18 | -40.1561 | 210.07 | -24.6211 | 176.95 |
| 4 | -178 | 4  | 11.7543 | 283.13 | -49.0905 | 210.4  | -24.8562 | 177.22 |
| 4 | -178 | 5  | 13.5833 | 283.05 | -57.0428 | 210.84 | -23.5809 | 177.56 |
| 4 | -179 | -5 | -3.0607 | 283.74 | 47.5089  | 210.81 | -6.9929  | 176.72 |
| 4 | -179 | -4 | -1.5995 | 283.66 | 36.6167  | 210.4  | -9.4398  | 176.58 |
| 4 | -179 | -3 | -0.1087 | 283.6  | 25.5034  | 210.09 | -12.0679 | 176.49 |
| 4 | -179 | -2 | 1.4141  | 283.56 | 14.3265  | 209.87 | -14.8285 | 176.45 |
| 4 | -179 | -1 | 2.9787  | 283.52 | 3.164    | 209.73 | -17.5663 | 176.45 |
| 4 | -179 | 0  | 4.558   | 283.49 | -7.9785  | 209.67 | -20.1147 | 176.49 |
| 4 | -179 | 1  | 6.1855  | 283.46 | -18.677  | 209.7  | -22.4159 | 176.59 |
| 4 | -179 | 2  | 7.8382  | 283.42 | -28.9747 | 209.81 | -24.2587 | 176.74 |
| 4 | -179 | 3  | 9.5985  | 283.38 | -39.0774 | 210    | -25.5995 | 176.94 |
| 4 | -179 | 4  | 11.3672 | 283.31 | -48.4256 | 210.29 | -26.2    | 177.2  |
| 4 | -179 | 5  | 13.1604 | 283.24 | -56.9984 | 210.68 | -25.8417 | 177.51 |
| 4 | 180  | -5 | 1.7689  | 283.25 | 16.9983  | 209.46 | -10.3599 | 176.48 |
| 4 | 180  | -4 | 2.2269  | 283.32 | 12.7164  | 209.48 | -12.4457 | 176.48 |
| 4 | 180  | -3 | 2.7285  | 283.4  | 8.1994   | 209.5  | -14.5832 | 176.47 |
| 4 | 180  | -2 | 3.2206  | 283.49 | 3.6946   | 209.54 | -16.6503 | 176.48 |
| 4 | 180  | -1 | 3.7474  | 283.57 | -0.9521  | 209.61 | -18.7606 | 176.5  |
| 4 | 180  | 0  | 4.2643  | 283.67 | -5.5887  | 209.69 | -20.8189 | 176.52 |
| 4 | 180  | 1  | 4.7981  | 283.78 | -10.2901 | 209.79 | -22.8532 | 176.55 |
| 4 | 180  | 2  | 5.3404  | 283.89 | -15.0576 | 209.9  | -24.8285 | 176.58 |
| 4 | 180  | 3  | 5.8679  | 284.03 | -19.7705 | 210.05 | -26.6253 | 176.62 |
| 4 | 180  | 4  | 6.4689  | 284.16 | -24.6474 | 210.2  | -28.4204 | 176.67 |
| 4 | 180  | 5  | 7.0523  | 284.31 | -29.5453 | 210.37 | -30.0056 | 176.73 |

|   |     |    |         |        |          |        |          |        |
|---|-----|----|---------|--------|----------|--------|----------|--------|
| 4 | 179 | -5 | -3.3927 | 284.2  | 52.3542  | 211.03 | -8.6764  | 176.79 |
| 4 | 179 | -4 | -2.0029 | 284.09 | 41.4425  | 210.58 | -10.8955 | 176.66 |
| 4 | 179 | -3 | -0.5656 | 284.01 | 30.2921  | 210.24 | -13.4308 | 176.56 |
| 4 | 179 | -2 | 0.9195  | 283.94 | 19.0334  | 209.98 | -16.1542 | 176.51 |
| 4 | 179 | -1 | 2.4364  | 283.88 | 7.6406   | 209.81 | -18.8677 | 176.51 |
| 4 | 179 | 0  | 3.9909  | 283.83 | -3.6198  | 209.72 | -21.4746 | 176.55 |
| 4 | 179 | 1  | 5.6262  | 283.79 | -14.9579 | 209.71 | -23.7701 | 176.64 |
| 4 | 179 | 2  | 7.185   | 283.75 | -25.6331 | 209.79 | -25.6942 | 176.78 |
| 4 | 179 | 3  | 8.8724  | 283.7  | -35.9905 | 209.94 | -27.199  | 176.96 |
| 4 | 179 | 4  | 10.5839 | 283.65 | -45.9462 | 210.17 | -28.138  | 177.2  |
| 4 | 179 | 5  | 12.3618 | 283.59 | -55.6035 | 210.49 | -28.5199 | 177.48 |
| 4 | 178 | -5 | -3.5544 | 284.43 | 54.7388  | 211.16 | -9.8321  | 176.84 |
| 4 | 178 | -4 | -2.1913 | 284.3  | 43.9942  | 210.69 | -11.8102 | 176.7  |
| 4 | 178 | -3 | -0.7834 | 284.2  | 32.8205  | 210.32 | -14.2327 | 176.61 |
| 4 | 178 | -2 | 0.6688  | 284.12 | 21.49    | 210.05 | -16.867  | 176.55 |
| 4 | 178 | -1 | 2.1751  | 284.05 | 10.1126  | 209.86 | -19.5711 | 176.55 |
| 4 | 178 | 0  | 3.7055  | 283.99 | -1.3043  | 209.76 | -22.1357 | 176.59 |
| 4 | 178 | 1  | 5.3212  | 283.94 | -12.7945 | 209.74 | -24.4319 | 176.67 |
| 4 | 178 | 2  | 6.8612  | 283.89 | -23.6157 | 209.8  | -26.3598 | 176.81 |
| 4 | 178 | 3  | 8.5138  | 283.84 | -34.2928 | 209.93 | -27.8686 | 176.99 |
| 4 | 178 | 4  | 10.2222 | 283.79 | -44.4472 | 210.14 | -28.9304 | 177.21 |
| 4 | 178 | 5  | 11.9621 | 283.73 | -54.1853 | 210.44 | -29.4393 | 177.49 |
| 4 | 177 | -5 | -3.7061 | 284.66 | 57.1868  | 211.31 | -11.6419 | 176.89 |
| 4 | 177 | -4 | -2.3705 | 284.52 | 46.512   | 210.81 | -12.895  | 176.75 |
| 4 | 177 | -3 | -0.9989 | 284.4  | 35.4283  | 210.42 | -15.1496 | 176.65 |
| 4 | 177 | -2 | 0.4346  | 284.3  | 24.0795  | 210.13 | -17.6747 | 176.6  |
| 4 | 177 | -1 | 1.9052  | 284.22 | 12.6098  | 209.93 | -20.2817 | 176.59 |
| 4 | 177 | 0  | 3.4177  | 284.14 | 1.1512   | 209.81 | -22.8153 | 176.63 |
| 4 | 177 | 1  | 5.0006  | 284.08 | -10.4864 | 209.77 | -25.0883 | 176.71 |
| 4 | 177 | 2  | 6.6034  | 284.03 | -21.5952 | 209.82 | -27.0242 | 176.84 |
| 4 | 177 | 3  | 8.1778  | 283.97 | -32.2932 | 209.94 | -28.5313 | 177.02 |
| 4 | 177 | 4  | 9.8657  | 283.92 | -42.7555 | 210.14 | -29.6436 | 177.24 |
| 4 | 177 | 5  | 11.587  | 283.86 | -52.6927 | 210.41 | -30.2587 | 177.51 |
| 4 | 176 | -5 | -3.857  | 284.88 | 59.5697  | 211.47 | -17.4488 | 176.99 |
| 4 | 176 | -4 | -2.5602 | 284.73 | 49.0833  | 210.95 | -14.3918 | 176.81 |



|        |      |    |          |        |          |        |          |        |
|--------|------|----|----------|--------|----------|--------|----------|--------|
| 4      | 176  | -3 | -1.2065  | 284.59 | 38.0751  | 210.54 | -16.1842 | 176.71 |
| 4      | 176  | -2 | 0.188    | 284.47 | 26.7556  | 210.22 | -18.5575 | 176.65 |
| 4      | 176  | -1 | 1.6455   | 284.37 | 15.2685  | 210    | -21.0613 | 176.64 |
| 4      | 176  | 0  | 3.1363   | 284.29 | 3.7367   | 209.87 | -23.5348 | 176.68 |
| 4      | 176  | 1  | 4.6959   | 284.22 | -8.0086  | 209.82 | -25.758  | 176.76 |
| 4      | 176  | 2  | 6.2742   | 284.16 | -19.2701 | 209.85 | -27.671  | 176.89 |
| 4      | 176  | 3  | 7.8978   | 284.09 | -30.2785 | 209.96 | -29.1735 | 177.06 |
| 4      | 176  | 4  | 9.5103   | 284.03 | -40.8394 | 210.14 | -30.3094 | 177.27 |
| 4      | 176  | 5  | 11.214   | 283.97 | -51.0072 | 210.4  | -30.9875 | 177.53 |
| 4      | 175  | -5 | -4.0113  | 285.1  | 61.2258  | 211.65 | -24.9326 | 177.83 |
| 4      | 175  | -4 | -2.7461  | 284.93 | 51.6471  | 211.1  | -17.3871 | 176.89 |
| 4      | 175  | -3 | -1.4271  | 284.77 | 40.7877  | 210.66 | -17.4796 | 176.77 |
| 4      | 175  | -2 | -0.0497  | 284.64 | 29.5503  | 210.33 | -19.5661 | 176.71 |
| 4      | 175  | -1 | 1.3813   | 284.53 | 18.0139  | 210.09 | -21.9215 | 176.7  |
| 4      | 175  | 0  | 2.8579   | 284.43 | 6.3945   | 209.94 | -24.228  | 176.73 |
| 4      | 175  | 1  | 4.3832   | 284.34 | -5.4163  | 209.88 | -26.4378 | 176.81 |
| 4      | 175  | 2  | 5.9465   | 284.27 | -16.7389 | 209.9  | -28.3013 | 176.93 |
| 4      | 175  | 3  | 7.5252   | 284.2  | -27.6654 | 209.99 | -29.835  | 177.1  |
| 4      | 175  | 4  | 9.1573   | 284.14 | -38.6547 | 210.16 | -30.939  | 177.31 |
| 4      | 175  | 5  | 10.8486  | 284.08 | -49.0721 | 210.4  | -31.6577 | 177.57 |
| 5      | -175 | 0  | 10.2661  | 277.04 | -42.1523 | 214.34 | -7.6321  | 182.87 |
| 5      | -175 | 5  | 22.2241  | 278.31 | -125.635 | 215.91 | 72.7419  | 186.23 |
| 5      | 180  | -5 | -7.3694  | 275.97 | 58.8142  | 215.7  | -13.2294 | 184.11 |
| 5      | 180  | 0  | 5.1765   | 276.58 | -5.2952  | 213.95 | -10.4907 | 182.89 |
| 5      | 180  | 5  | 17.3777  | 277.58 | -78.2184 | 214.39 | -6.9882  | 183.31 |
| 5      | 175  | -5 | -13.8362 | 275.39 | 69.6804  | 218.75 | -14.3524 | 187.07 |
| 5      | 175  | 0  | -0.3946  | 275.83 | 19.7117  | 215.02 | -12.4079 | 184.11 |
| 5      | 175  | 5  | 12.2952  | 276.64 | -44.4255 | 214.19 | -9.5298  | 183.5  |
| (4S)-6 | -175 | -5 | -9.4679  | 283.81 | 36.133   | 214.56 | 18.4461  | 177.21 |
| (4S)-6 | -175 | 0  | 1.4299   | 284.42 | -23.4174 | 211.7  | 16.916   | 177.18 |
| (4S)-6 | -175 | 5  | 11.9497  | 285.46 | -99.9001 | 211.85 | 49.7272  | 184.28 |
| (4S)-6 | 180  | -5 | -14.8516 | 283.43 | 36.1332  | 218.85 | 12.5998  | 180.62 |
| (4S)-6 | 180  | 0  | 4.5925   | 284.13 | -38.909  | 210.77 | -18.7152 | 175.18 |
| (4S)-6 | 180  | 5  | 7.3213   | 284.86 | -60.3205 | 211.53 | -17.8685 | 175.64 |
| (4S)-6 | 175  | -5 | -21.7914 | 282.51 | 2.9522   | 232.34 | 2.592    | 191.69 |

|        |      |    |          |        |          |        |          |        |
|--------|------|----|----------|--------|----------|--------|----------|--------|
| (4S)-6 | 175  | 0  | -8.56    | 283.01 | -3.7455  | 219.24 | 1.801    | 181.36 |
| (4S)-6 | 175  | 5  | 2.6224   | 283.78 | -40.3535 | 213.66 | -13.492  | 177.13 |
| (4R)-6 | -175 | -5 | -4.2624  | 284.74 | 77.1275  | 214.65 | -3.9704  | 177.05 |
| (4R)-6 | -175 | 0  | 5.62     | 285.26 | 11.9874  | 212.61 | 10.5413  | 184.13 |
| (4R)-6 | -175 | 5  | 15.8173  | 286.3  | -79.6847 | 213.04 | 58.3572  | 193.94 |
| (4R)-6 | 180  | -5 | -7.4293  | 284.58 | 97.4792  | 216.21 | -2.84    | 177.06 |
| (4R)-6 | 180  | 0  | 2.1134   | 284.86 | 44.8022  | 212.87 | -20.49   | 175.86 |
| (4R)-6 | 180  | 5  | 11.8174  | 285.57 | -24.0679 | 212.17 | 35.0631  | 181.07 |
| (4R)-6 | 175  | -5 | -11.0286 | 284.27 | 103.4973 | 222.37 | 18.5646  | 185.08 |
| (4R)-6 | 175  | 0  | -1.2953  | 284.29 | 65.7241  | 215.31 | -22.0578 | 176.9  |
| (4R)-6 | 175  | 5  | 8.2756   | 284.71 | 7.3405   | 212.79 | -42.5315 | 176.43 |
| (4S)-7 | -175 | -5 | -2.747   | 285.76 | -20.4479 | 209.2  | 52.2155  | 190.05 |
| (4S)-7 | -175 | -4 | -0.7389  | 285.73 | -34.8596 | 209.05 | 57.8486  | 189.72 |
| (4S)-7 | -175 | -3 | 1.2802   | 285.72 | -48.6588 | 208.94 | 62.8802  | 189.41 |
| (4S)-7 | -175 | -2 | 3.3129   | 285.69 | -61.9209 | 208.89 | 67.1842  | 189.13 |
| (4S)-7 | -175 | -1 | 5.3742   | 285.65 | -74.5888 | 208.87 | 70.6511  | 188.86 |
| (4S)-7 | -175 | 0  | 7.4127   | 285.6  | -86.5227 | 208.9  | 73.2104  | 188.64 |
| (4S)-7 | -175 | 1  | 9.4971   | 285.61 | -97.7963 | 208.97 | 74.4749  | 188.46 |
| (4S)-7 | -175 | 2  | 11.5656  | 285.53 | -108.223 | 209.07 | 74.4375  | 188.33 |
| (4S)-7 | -175 | 3  | 13.5947  | 285.44 | -117.466 | 209.2  | 71.9972  | 188.31 |
| (4S)-7 | -175 | 4  | 15.6714  | 285.33 | -126.352 | 209.37 | 65.6202  | 188.51 |
| (4S)-7 | -175 | 5  | 17.6799  | 285.19 | -134.246 | 209.59 | 52.6871  | 189.15 |
| (4S)-7 | 180  | -5 | -5.6548  | 286.94 | -4.9399  | 209.9  | 60.7009  | 190.8  |
| (4S)-7 | 180  | -4 | -3.7253  | 286.88 | -19.6322 | 209.78 | 66.9893  | 190.34 |
| (4S)-7 | 180  | -3 | -1.7487  | 286.83 | -33.9215 | 209.72 | 72.7087  | 189.92 |
| (4S)-7 | 180  | -2 | 0.2094   | 286.79 | -47.6509 | 209.71 | 77.8014  | 189.52 |
| (4S)-7 | 180  | -1 | 2.2033   | 286.76 | -60.9534 | 209.74 | 82.2228  | 189.15 |
| (4S)-7 | 180  | 0  | 4.2292   | 286.72 | -73.4198 | 209.82 | 85.8777  | 188.8  |
| (4S)-7 | 180  | 1  | 6.2767   | 286.69 | -85.2198 | 209.92 | 88.7647  | 188.47 |
| (4S)-7 | 180  | 2  | 8.3462   | 286.65 | -96.3937 | 210.06 | 90.8884  | 188.18 |
| (4S)-7 | 180  | 3  | 10.4317  | 286.6  | -106.923 | 210.24 | 92.151   | 187.92 |
| (4S)-7 | 180  | 4  | 12.5016  | 286.53 | -116.953 | 210.44 | 92.482   | 187.7  |
| (4S)-7 | 180  | 5  | 14.614   | 286.44 | -126.36  | 210.67 | 91.6528  | 187.53 |
| (4S)-7 | 175  | -5 | -8.6196  | 287.84 | 15.7699  | 210.55 | 61.3159  | 191.72 |
| (4S)-7 | 175  | -4 | -6.7564  | 287.71 | 0.7895   | 210.44 | 68.3534  | 191.03 |

|                     |      |    |         |        |          |        |          |        |
|---------------------|------|----|---------|--------|----------|--------|----------|--------|
| (4S)-7              | 175  | -3 | -4.9207 | 287.57 | -13.6606 | 210.39 | 74.3608  | 190.39 |
| (4S)-7              | 175  | -2 | -3.004  | 287.48 | -27.4865 | 210.41 | 80.0941  | 189.84 |
| (4S)-7              | 175  | -1 | -1.0603 | 287.41 | -41.0893 | 210.48 | 85.1297  | 189.33 |
| (4S)-7              | 175  | 0  | 0.873   | 287.37 | -53.8732 | 210.6  | 89.472   | 188.87 |
| (4S)-7              | 175  | 1  | 2.8811  | 287.31 | -66.0937 | 210.75 | 93.0756  | 188.44 |
| (4S)-7              | 175  | 2  | 4.9248  | 287.26 | -77.7747 | 210.93 | 96.0055  | 188.04 |
| (4S)-7              | 175  | 3  | 6.9927  | 287.2  | -89.1473 | 211.14 | 98.242   | 187.68 |
| (4S)-7              | 175  | 4  | 9.0873  | 287.15 | -99.7792 | 211.39 | 99.8036  | 187.36 |
| (4S)-7              | 175  | 5  | 11.198  | 287.09 | -109.656 | 211.66 | 100.5868 | 187.06 |
| (4S)-7 <sup>b</sup> | 180  | -2 | 5.5024  | 285.26 | -61.3092 | 211.25 | 105.9901 | 182.18 |
| (4S)-7 <sup>b</sup> | 180  | -1 | 5.9512  | 285.3  | -64.7207 | 211.41 | 107.3148 | 182.1  |
| (4S)-7 <sup>b</sup> | 180  | 0  | 4.6029  | 285.81 | -61.4557 | 212.43 | 108.5535 | 183.41 |
| (4S)-7 <sup>b</sup> | 180  | 1  | 6.902   | 285.42 | -71.4999 | 211.78 | 109.8861 | 181.98 |
| (4S)-7 <sup>b</sup> | 180  | 2  | 7.4094  | 285.5  | -74.8818 | 211.99 | 111.1203 | 181.94 |
| (4S)-7 <sup>b</sup> | 179  | -2 | 4.8103  | 285.2  | -59.3379 | 211.19 | 106.0749 | 182.13 |
| (4S)-7 <sup>b</sup> | 179  | -1 | 5.2452  | 285.24 | -62.8025 | 211.34 | 107.4137 | 182.06 |
| (4S)-7 <sup>b</sup> | 179  | 0  | 5.729   | 285.25 | -66.2731 | 211.51 | 108.7152 | 181.98 |
| (4S)-7 <sup>b</sup> | 179  | 1  | 6.1904  | 285.31 | -69.6594 | 211.68 | 109.9751 | 181.92 |
| (4S)-7 <sup>b</sup> | 179  | 2  | 6.7045  | 285.36 | -73.0166 | 211.89 | 111.2618 | 181.86 |
| (4S)-7 <sup>b</sup> | 178  | -2 | 4.1496  | 285.13 | -57.4367 | 211.13 | 106.023  | 182.07 |
| (4S)-7 <sup>b</sup> | 178  | -1 | 4.6033  | 285.14 | -60.9351 | 211.28 | 107.4614 | 181.99 |
| (4S)-7 <sup>b</sup> | 178  | 0  | 5.0516  | 285.17 | -64.3732 | 211.44 | 108.7958 | 181.92 |
| (4S)-7 <sup>b</sup> | 178  | 1  | 5.5018  | 285.22 | -67.8289 | 211.61 | 110.1375 | 181.87 |
| (4S)-7 <sup>b</sup> | 178  | 2  | 5.9832  | 285.27 | -71.1849 | 211.8  | 111.426  | 181.81 |
| (4S)-7 <sup>b</sup> | 177  | -2 | 3.4914  | 285.04 | -55.5807 | 211.06 | 106.0226 | 182.01 |
| (4S)-7 <sup>b</sup> | 177  | -1 | 3.9551  | 285.06 | -59.0778 | 211.21 | 107.4887 | 181.92 |
| (4S)-7 <sup>b</sup> | 177  | 0  | 4.4032  | 285.08 | -62.5137 | 211.37 | 108.8451 | 181.84 |
| (4S)-7 <sup>b</sup> | 177  | 1  | 4.8605  | 285.1  | -65.9275 | 211.54 | 110.1516 | 181.78 |
| (4S)-7 <sup>b</sup> | 177  | 2  | 5.3063  | 285.14 | -69.402  | 211.71 | 111.4981 | 181.73 |
| (4R)-7              | -175 | -5 | -6.6112 | 291.08 | 74.4017  | 213.26 | -62.8953 | 192.38 |
| (4R)-7              | -175 | -4 | -5.132  | 290.95 | 68.0391  | 212.44 | -64.6742 | 192.65 |
| (4R)-7              | -175 | -3 | -3.6416 | 290.82 | 62.0916  | 211.68 | -65.5344 | 192.94 |
| (4R)-7              | -175 | -2 | -2.1984 | 290.61 | 55.8493  | 211.06 | -66.3422 | 193.37 |
| (4R)-7              | -175 | -1 | -0.7183 | 290.46 | 48.7437  | 210.39 | -66.1078 | 193.68 |
| (4R)-7              | -175 | 0  | 2.8584  | 291.83 | 38.6997  | 209.6  | -63.7148 | 199.97 |

|        |      |    |          |        |          |        |          |        |
|--------|------|----|----------|--------|----------|--------|----------|--------|
| (4R)-7 | -175 | 1  | 2.3152   | 290.15 | 32.9903  | 209.18 | -62.2701 | 194.26 |
| (4R)-7 | -175 | 2  | 3.6453   | 289.9  | 24.1667  | 208.72 | -59.0408 | 194.67 |
| (4R)-7 | -175 | 3  | 5.1781   | 289.66 | 14.6205  | 208.27 | -53.6778 | 195.08 |
| (4R)-7 | -175 | 4  | 6.6511   | 289.4  | 4.6177   | 207.87 | -45.5589 | 195.58 |
| (4R)-7 | -175 | 5  | 8.0477   | 289.11 | -5.8812  | 207.54 | -33.2989 | 196.28 |
| (4R)-7 | 180  | -5 | -7.9366  | 292.33 | 83.4663  | 213.65 | -54.0962 | 192.92 |
| (4R)-7 | 180  | -4 | -6.3779  | 292.18 | 77.089   | 212.82 | -56.4774 | 193.23 |
| (4R)-7 | 180  | -3 | -4.8581  | 292.03 | 70.2995  | 212.03 | -58.2896 | 193.51 |
| (4R)-7 | 180  | -2 | -3.3658  | 291.88 | 63.0401  | 211.3  | -59.2628 | 193.82 |
| (4R)-7 | 180  | -1 | -1.8675  | 291.75 | 55.3136  | 210.63 | -59.4624 | 194.14 |
| (4R)-7 | 180  | 0  | -0.4325  | 291.55 | 47.6424  | 210.1  | -59.5388 | 194.6  |
| (4R)-7 | 180  | 1  | 1.0682   | 291.41 | 38.9889  | 209.53 | -57.9159 | 194.92 |
| (4R)-7 | 180  | 2  | 2.4835   | 291.27 | 29.3993  | 209    | -55.2338 | 195.18 |
| (4R)-7 | 180  | 3  | 3.9346   | 291.1  | 19.0424  | 208.56 | -51.6331 | 195.48 |
| (4R)-7 | 180  | 4  | 5.3592   | 290.92 | 7.902    | 208.17 | -46.8189 | 195.78 |
| (4R)-7 | 180  | 5  | 6.7833   | 290.67 | -3.5429  | 207.89 | -41.31   | 196.15 |
| (4R)-7 | 175  | -5 | -9.5073  | 293.27 | 93.193   | 213.96 | -42.9965 | 193.11 |
| (4R)-7 | 175  | -4 | -7.9669  | 293.07 | 86.8096  | 213.1  | -46.4594 | 193.38 |
| (4R)-7 | 175  | -3 | -6.4409  | 292.88 | 79.8918  | 212.3  | -48.8993 | 193.67 |
| (4R)-7 | 175  | -2 | -4.9073  | 292.7  | 72.4461  | 211.57 | -50.4976 | 194    |
| (4R)-7 | 175  | -1 | -3.3883  | 292.54 | 64.2819  | 210.89 | -50.9997 | 194.31 |
| (4R)-7 | 175  | 0  | -2.8569  | 291.26 | 52.2065  | 211.51 | -38.6748 | 197.44 |
| (4R)-7 | 175  | 1  | -0.7731  | 292.23 | 46.3572  | 209.72 | -49.264  | 194.95 |
| (4R)-7 | 175  | 2  | 1.0727   | 292.09 | 35.8207  | 209.23 | -46.7535 | 195.27 |
| (4R)-7 | 175  | 3  | 2.5146   | 291.87 | 25.4909  | 208.87 | -44.0925 | 195.73 |
| (4R)-7 | 175  | 4  | 4.0016   | 291.72 | 13.5532  | 208.51 | -39.4964 | 196.01 |
| (4R)-7 | 175  | 5  | 5.4841   | 291.56 | 0.2787   | 208.2  | -33.4383 | 196.24 |
| (5R)-8 | -175 | -5 | -13.8905 | 285.64 | 69.251   | 216.36 | 11.6424  | 178.95 |
| (5R)-8 | -175 | 0  | -3.3227  | 286.36 | 25.5927  | 213.34 | -3.5597  | 177    |
| (5R)-8 | -175 | 5  | 6.7449   | 287.4  | -41.2302 | 212.78 | 24.2977  | 183.55 |
| (5R)-8 | 180  | -5 | -19.4573 | 285.17 | 51.9663  | 221.13 | 14.5916  | 182.26 |
| (5R)-8 | 180  | 0  | -0.6028  | 286.17 | 10.0251  | 212.21 | -1.5029  | 176.22 |
| (5R)-8 | 180  | 5  | 2.0535   | 286.77 | -9.0322  | 213.43 | -11.903  | 176.64 |
| (5R)-8 | 175  | -5 | -26.3351 | 283.7  | -8.388   | 235.9  | 17.4968  | 193.37 |
| (5R)-8 | 175  | 0  | -13.6605 | 284.59 | 10.1324  | 222.34 | 8.4294   | 183.32 |

|        |      |    |          |        |          |        |          |        |
|--------|------|----|----------|--------|----------|--------|----------|--------|
| (5R)-8 | 175  | 5  | -2.7203  | 285.59 | -4.3427  | 216.41 | -3.8707  | 178.85 |
| (5S)-8 | -175 | -5 | -3.0954  | 283.69 | 25.3386  | 210.65 | 13.2595  | 176.73 |
| (5S)-8 | -175 | 0  | 6.5429   | 284.32 | -44.0078 | 209.94 | 35.5624  | 182.72 |
| (5S)-8 | -175 | 5  | 16.4739  | 285.32 | -126.965 | 212.17 | 73.0378  | 190.79 |
| (5S)-8 | 180  | -5 | -7.3038  | 283.66 | 47.6576  | 211.8  | 2.4529   | 177.38 |
| (5S)-8 | 180  | 0  | 2.4934   | 284.15 | -10.8928 | 209.3  | -21.976  | 175.9  |
| (5S)-8 | 180  | 5  | 12.2286  | 284.96 | -73.8303 | 210.26 | 54.7665  | 179.46 |
| (5S)-8 | 175  | -5 | -11.6115 | 283.16 | 50.9367  | 216.23 | 1.5321   | 180.6  |
| (5S)-8 | 175  | 0  | -1.6878  | 283.54 | 13.2345  | 211.51 | -14.0562 | 177.46 |
| (5S)-8 | 175  | 5  | 8.1085   | 284.23 | -41.8657 | 210.34 | -36.026  | 177.00 |
| (5R)-9 | -175 | -5 | -5.8837  | 286.2  | 15.9721  | 210.83 | 5.4624   | 187.02 |
| (5R)-9 | -175 | -4 | -4.0369  | 285.98 | 4.0142   | 210.5  | 9.4798   | 186.42 |
| (5R)-9 | -175 | -3 | -2.193   | 285.79 | -7.7377  | 210.22 | 12.3755  | 186.03 |
| (5R)-9 | -175 | -2 | -0.3102  | 285.62 | -18.6575 | 209.99 | 13.925   | 185.88 |
| (5R)-9 | -175 | -1 | 1.5663   | 285.45 | -29.4181 | 209.81 | 13.9739  | 186.04 |
| (5R)-9 | -175 | 0  | 3.5215   | 285.25 | -39.4255 | 209.67 | 12.2486  | 186.57 |
| (5R)-9 | -175 | 1  | 5.4845   | 285.08 | -48.8145 | 209.58 | 8.9373   | 187.54 |
| (5R)-9 | -175 | 2  | 7.4716   | 284.9  | -57.4706 | 209.52 | 4.5769   | 189.09 |
| (5R)-9 | -175 | 3  | 9.4634   | 284.7  | -65.4153 | 209.52 | -0.4864  | 191.31 |
| (5R)-9 | -175 | 4  | 11.47    | 284.5  | -71.9836 | 209.55 | -5.9003  | 194.29 |
| (5R)-9 | -175 | 5  | 13.4342  | 284.28 | -75.8523 | 209.62 | -12.7169 | 198.07 |
| (5R)-9 | 180  | -5 | -7.5021  | 288.15 | 27.4111  | 211.36 | 4.1716   | 189.96 |
| (5R)-9 | 180  | -4 | -5.8162  | 287.85 | 13.51    | 211.01 | 10.6479  | 188.69 |
| (5R)-9 | 180  | -3 | -4.0653  | 287.58 | 0.7411   | 210.74 | 16.7668  | 187.61 |
| (5R)-9 | 180  | -2 | -2.2676  | 287.32 | -11.0577 | 210.52 | 22.1809  | 186.72 |
| (5R)-9 | 180  | -1 | -0.4333  | 287.08 | -22.9351 | 210.36 | 26.5114  | 186.01 |
| (5R)-9 | 180  | 0  | 1.4418   | 286.86 | -34.3006 | 210.23 | 29.4132  | 185.5  |
| (5R)-9 | 180  | 1  | 3.3329   | 286.66 | -45.1314 | 210.15 | 30.5231  | 185.23 |
| (5R)-9 | 180  | 2  | 5.2591   | 286.46 | -55.4409 | 210.11 | 29.525   | 185.26 |
| (5R)-9 | 180  | 3  | 7.1553   | 286.27 | -65.1366 | 210.11 | 26.312   | 185.62 |
| (5R)-9 | 180  | 4  | 9.134    | 286.11 | -74.2582 | 210.17 | 21.1061  | 186.43 |
| (5R)-9 | 180  | 5  | 11.1328  | 285.87 | -82.7265 | 210.24 | 14.5089  | 187.83 |
| (5R)-9 | 175  | -5 | -9.1811  | 290.31 | 45.0117  | 211.92 | -5.154   | 194.96 |
| (5R)-9 | 175  | -4 | -7.601   | 289.89 | 30.1036  | 211.54 | 1.6947   | 193.09 |
| (5R)-9 | 175  | -3 | -5.9292  | 289.41 | 16.4957  | 211.28 | 9.0591   | 191.5  |

|                     |      |    |         |        |          |        |         |        |
|---------------------|------|----|---------|--------|----------|--------|---------|--------|
| (5R)-9              | 175  | -2 | -4.2466 | 289.08 | 2.8491   | 211.05 | 16.0455 | 189.92 |
| (5R)-9              | 175  | -1 | -2.5395 | 288.71 | -10.3231 | 210.9  | 22.8941 | 188.58 |
| (5R)-9              | 175  | 0  | -0.7557 | 288.4  | -22.8715 | 210.79 | 29.1731 | 187.38 |
| (5R)-9              | 175  | 1  | 1.0625  | 288.11 | -34.8146 | 210.73 | 34.5928 | 186.38 |
| (5R)-9              | 175  | 2  | 2.928   | 287.84 | -46.2112 | 210.72 | 38.7722 | 185.57 |
| (5R)-9              | 175  | 3  | 4.8472  | 287.58 | -57.0946 | 210.75 | 41.3002 | 184.98 |
| (5R)-9              | 175  | 4  | 6.7937  | 287.39 | -67.4426 | 210.83 | 41.7781 | 184.61 |
| (5R)-9              | 175  | 5  | 8.6442  | 287.13 | -76.9865 | 210.92 | 39.5979 | 184.54 |
| (5R)-9 <sup>c</sup> | 180  | -2 | 1.261   | 283.23 | -5.9483  | 208.95 | 1.8694  | 181.95 |
| (5R)-9 <sup>c</sup> | 180  | -1 | 1.8212  | 283.32 | -10.8605 | 209.02 | 4.8279  | 181.98 |
| (5R)-9 <sup>c</sup> | 180  | 0  | 1.5275  | 286.84 | -38.5513 | 209.86 | 30.29   | 185.5  |
| (5R)-9 <sup>c</sup> | 180  | 1  | 2.9319  | 283.53 | -20.6491 | 209.23 | 10.8128 | 182.06 |
| (5R)-9 <sup>c</sup> | 180  | 2  | 3.4938  | 283.66 | -25.6696 | 209.35 | 13.8668 | 182.1  |
| (5R)-9 <sup>c</sup> | 179  | -2 | 0.6051  | 283.14 | -4.0255  | 208.89 | 2.3649  | 181.89 |
| (5R)-9 <sup>c</sup> | 179  | -1 | 1.1934  | 283.22 | -9.024   | 208.96 | 5.3974  | 181.92 |
| (5R)-9 <sup>c</sup> | 179  | 0  | 1.7082  | 283.29 | -13.6879 | 209.02 | 8.1247  | 181.94 |
| (5R)-9 <sup>c</sup> | 179  | 1  | 2.2774  | 283.39 | -18.7409 | 209.12 | 11.2199 | 181.98 |
| (5R)-9 <sup>c</sup> | 179  | 2  | 2.8297  | 283.5  | -23.6444 | 209.25 | 14.2781 | 182.03 |
| (5R)-9 <sup>c</sup> | 178  | -2 | -0.065  | 283.03 | -2.0828  | 208.82 | 2.7196  | 181.84 |
| (5R)-9 <sup>c</sup> | 178  | -1 | 0.5176  | 283.1  | -7.0103  | 208.88 | 5.719   | 181.85 |
| (5R)-9 <sup>c</sup> | 178  | 0  | 1.0764  | 283.17 | -11.8968 | 208.95 | 8.714   | 181.88 |
| (5R)-9 <sup>c</sup> | 178  | 1  | 1.6377  | 283.26 | -16.8405 | 209.04 | 11.717  | 181.91 |
| (5R)-9 <sup>c</sup> | 178  | 2  | 2.1586  | 283.33 | -21.5636 | 209.14 | 14.5689 | 181.94 |
| (5R)-9 <sup>c</sup> | 177  | -2 | -0.7599 | 282.93 | -0.0778  | 208.76 | 3.1021  | 181.79 |
| (5R)-9 <sup>c</sup> | 177  | -1 | -0.1812 | 282.98 | -4.9272  | 208.8  | 6.0022  | 181.8  |
| (5R)-9 <sup>c</sup> | 177  | 0  | 0.3877  | 283.05 | -9.774   | 208.87 | 8.9413  | 181.81 |
| (5R)-9 <sup>c</sup> | 177  | 1  | 1.0069  | 283.12 | -14.9764 | 208.96 | 12.2251 | 181.84 |
| (5R)-9 <sup>c</sup> | 177  | 2  | 1.4565  | 283.19 | -19.3384 | 209.04 | 14.7764 | 181.87 |
| (5S)-9              | -175 | -5 | -8.1418 | 281.73 | 40.5743  | 210.08 | -7.8288 | 186.26 |
| (5S)-9              | -175 | 0  | -0.9525 | 281.91 | -25.4731 | 209.29 | 21.2408 | 192.78 |
| (5S)-9              | -175 | 5  | 6.6494  | 282.33 | -103.981 | 212.8  | 59.0074 | 199.22 |
| (5S)-9              | 180  | -5 | -8.7155 | 282.04 | 52.3961  | 211.47 | -7.5557 | 178.54 |
| (5S)-9              | 180  | 0  | -2.0047 | 282.11 | 3.7925   | 208.77 | 0.1491  | 182.66 |
| (5S)-9              | 180  | 5  | 5.2362  | 282.42 | -54.1601 | 209.59 | 21.9117 | 189.08 |
| (5S)-9              | 175  | -5 | -8.4422 | 281.92 | 45.4208  | 215.53 | 54.3787 | 178.26 |

|         |      |    |          |        |          |        |          |        |
|---------|------|----|----------|--------|----------|--------|----------|--------|
| (5S)-9  | 175  | 0  | -2.2974  | 281.86 | 16.2851  | 211.17 | 12.4415  | 176.2  |
| (5S)-9  | 175  | 5  | 4.3002   | 282.07 | -28.3469 | 209.87 | 8.0705   | 179.74 |
| (6R)-10 | -175 | -5 | -9.3016  | 286.05 | 73.6783  | 213.14 | 9.0447   | 178.85 |
| (6R)-10 | -175 | 0  | 0.0885   | 286.8  | 17.3815  | 210.59 | -5.9235  | 176.99 |
| (6R)-10 | -175 | 5  | 9.5245   | 287.96 | -56.9549 | 210.62 | 41.2633  | 181.97 |
| (6R)-10 | 180  | -5 | -13.021  | 285.51 | 78.5866  | 216.7  | 3.3512   | 181.84 |
| (6R)-10 | 180  | 0  | 3.2208   | 286.19 | 3.3814   | 209.1  | -20.1435 | 176.73 |
| (6R)-10 | 180  | 5  | 5.6236   | 287.1  | -15.6865 | 210.23 | -30.5016 | 177.31 |
| (6R)-10 | 175  | -5 | -15.9665 | 284.42 | 46.8842  | 227.92 | -10.5235 | 191.33 |
| (6R)-10 | 175  | 0  | -6.8013  | 285.03 | 42.2143  | 216.87 | -7.1657  | 182.61 |
| (6R)-10 | 175  | 5  | 2.2048   | 285.88 | 6.1251   | 212.09 | -19.5154 | 178.94 |
| (6S)-10 | -175 | -5 | -3.4099  | 285.92 | 15.7119  | 210.95 | 13.1915  | 176.14 |
| (6S)-10 | -175 | 0  | 6.3924   | 286.4  | -49.0821 | 209.96 | 25.4155  | 180.33 |
| (6S)-10 | -175 | 5  | 16.0833  | 287.23 | -127.552 | 211.57 | 62.3496  | 187.92 |
| (6S)-10 | 180  | -5 | -7.4036  | 285.37 | 29.7656  | 212.08 | 10.8316  | 177.41 |
| (6S)-10 | 180  | 0  | 2.7152   | 285.81 | -22.7426 | 209.33 | -4.9236  | 175.26 |
| (6S)-10 | 180  | 5  | 12.16    | 286.59 | -80.8042 | 210.07 | 41.9403  | 177.73 |
| (6S)-10 | 175  | -5 | -11.6251 | 284.28 | 18.1949  | 216.42 | 4.8495   | 181.09 |
| (6S)-10 | 175  | 0  | -1.4194  | 284.71 | -9.905   | 211.57 | -2.2338  | 177.31 |
| (6S)-10 | 175  | 5  | 8.4328   | 285.43 | -56.8802 | 210.22 | -23.1704 | 176.1  |
| (6R)-11 | -175 | -5 | -15.5683 | 279.27 | 91.2692  | 215.91 | -51.9393 | 183.57 |
| (6R)-11 | -175 | 0  | -3.5629  | 279.74 | 40.9887  | 213.55 | -67.6012 | 184.91 |
| (6R)-11 | -175 | 5  | 8.2281   | 280.51 | -23.9851 | 213.33 | -68.4968 | 187.05 |
| (6R)-11 | 180  | -5 | -20.9924 | 278.79 | 95.9622  | 218.93 | -33.8914 | 182.84 |
| (6R)-11 | 180  | 0  | -0.2057  | 278.17 | 29.6749  | 212.23 | -67.386  | 183.7  |
| (6R)-11 | 180  | 5  | 2.9998   | 279.92 | 11.2896  | 213.25 | -67.0208 | 184.75 |
| (6R)-11 | 175  | -5 | -26.4958 | 277.65 | 63.0892  | 228.33 | -14.5214 | 186.38 |
| (6R)-11 | 175  | 0  | -13.5834 | 278.17 | 60.6364  | 218.68 | -33.2403 | 182.87 |
| (6R)-11 | 175  | 5  | -1.7781  | 278.86 | 28.3068  | 214.72 | -49.6235 | 183.51 |
| (6S)-11 | -175 | -5 | -1.8874  | 299.52 | 35.1803  | 214.52 | -1.2623  | 183.17 |
| (6S)-11 | -175 | 0  | 5.9209   | 300.16 | -27.4383 | 213.53 | 12.4677  | 186.37 |
| (6S)-11 | -175 | 5  | 13.6666  | 301.23 | -93.8146 | 215.81 | 42.4366  | 190.91 |
| (6S)-11 | 180  | -5 | -3.3917  | 298.62 | 41.4512  | 214.92 | -2.8919  | 182.38 |
| (6S)-11 | 180  | 0  | 4.1634   | 299.29 | -6.3699  | 212.82 | 2.2906   | 183.64 |
| (6S)-11 | 180  | 5  | 11.4968  | 300.33 | -58.0072 | 213.89 | 6.6342   | 185.19 |

|         |      |    |          |        |          |        |          |        |
|---------|------|----|----------|--------|----------|--------|----------|--------|
| (6S)-11 | 175  | -5 | -4.3786  | 297.06 | 21.1488  | 217.94 | 13.521   | 182.04 |
| (6S)-11 | 175  | 0  | 2.9112   | 297.88 | -4.8452  | 213.63 | 12.8499  | 182.68 |
| (6S)-11 | 175  | 5  | 9.9609   | 298.96 | -43.1716 | 213.46 | 9.1104   | 183.15 |
| (4S)-12 | -175 | -5 | -1.856   | 276.1  | 14.7996  | 215.94 | -7.1127  | 182.72 |
| (4S)-12 | -175 | 0  | 10.6543  | 276.95 | -61.2605 | 215.37 | 33.1362  | 183.12 |
| (4S)-12 | -175 | 5  | 23.2147  | 278.26 | -147.394 | 217.32 | 71.2118  | 191.58 |
| (4S)-12 | 180  | -5 | -7.5893  | 275.84 | 37.8076  | 216.79 | -7.7797  | 183.48 |
| (4S)-12 | 180  | 0  | 5.291    | 276.46 | -24.9037 | 214.98 | -8.8407  | 182.22 |
| (4S)-12 | 180  | 5  | 17.8999  | 277.49 | -97.7969 | 215.53 | -8.9082  | 182.72 |
| (4S)-12 | 175  | -5 | -14.0044 | 275.27 | 41.6955  | 220.41 | -7.6755  | 186.44 |
| (4S)-12 | 175  | 0  | -0.3192  | 275.71 | -4.005   | 216.22 | -9.2042  | 183.29 |
| (4S)-12 | 175  | 5  | 12.6341  | 276.52 | -65.5123 | 215.33 | -9.8803  | 182.68 |
| (4R)-12 | -175 | -5 | -5.5943  | 276.79 | 79.6377  | 218.46 | -4.7992  | 182.67 |
| (4R)-12 | -175 | 0  | 4.9788   | 276.56 | 25.8025  | 216.85 | -5.591   | 181.91 |
| (4R)-12 | -175 | 5  | 16.063   | 276.03 | -18.1208 | 217.32 | -8.0223  | 182.34 |
| (4R)-12 | 180  | -5 | -7.1989  | 277.91 | 91.7671  | 218.77 | -5.7257  | 182.91 |
| (4R)-12 | 180  | 0  | 3.4618   | 277.55 | 33.4739  | 216.73 | -6.6845  | 181.86 |
| (4R)-12 | 180  | 5  | 13.5277  | 277.04 | -19.5957 | 216.64 | -7.7516  | 182.18 |
| (4R)-12 | 175  | -5 | -8.7014  | 278.91 | 104.2687 | 219.35 | -6.8754  | 183.25 |
| (4R)-12 | 175  | 0  | 0.972    | 278.18 | 47.1188  | 217.07 | -6.7533  | 182.32 |
| (4R)-12 | 175  | 5  | 11.3311  | 277.69 | -12.1531 | 216.58 | -7.7548  | 182.36 |
| (4S)-13 | -175 | -5 | -0.123   | 279.25 | -20.8298 | 215.12 | 54.616   | 190.46 |
| (4S)-13 | -175 | 0  | 12.3063  | 279.84 | -115.018 | 216.35 | 108.1051 | 193.78 |
| (4S)-13 | -175 | 5  | 25.5242  | 280.92 | -173.144 | 222.39 | 113.4896 | 196.64 |
| (4S)-13 | 180  | -5 | -6.5619  | 279.01 | 20.8394  | 215.22 | 26.9613  | 184.99 |
| (4S)-13 | 180  | 0  | 6.1262   | 279.37 | -59.8846 | 213.93 | 73.707   | 187.51 |
| (4S)-13 | 180  | 5  | 18.551   | 280.18 | -140.601 | 216.39 | 112.4148 | 190.58 |
| (4S)-13 | 175  | -5 | -13.143  | 278.52 | 34.7366  | 218.19 | 43.6285  | 182.07 |
| (4S)-13 | 175  | 0  | -0.0258  | 278.63 | -22.1305 | 214.2  | 51.0254  | 182.74 |
| (4S)-13 | 175  | 5  | 12.5108  | 279.21 | -97.2916 | 214.17 | 91.5551  | 184.93 |
| (4R)-13 | -175 | -5 | -7.3103  | 283.79 | 73.1529  | 217.18 | -57.9758 | 192.63 |
| (4R)-13 | -175 | 0  | 1.6132   | 283.08 | 21.6117  | 214.2  | -40.9085 | 193.36 |
| (4R)-13 | -175 | 5  | 10.0512  | 282.01 | -35.1522 | 212.74 | -4.0459  | 194.6  |
| (4R)-13 | 180  | -5 | -8.6567  | 284.96 | 83.8807  | 217.61 | -52.7996 | 193.05 |
| (4R)-13 | 180  | 0  | 0.2747   | 284.24 | 29.3862  | 214.52 | -36.7536 | 193.83 |



|         |      |    |          |        |          |        |          |        |
|---------|------|----|----------|--------|----------|--------|----------|--------|
| (4R)-13 | 180  | 5  | 8.9587   | 283.42 | -32.826  | 213    | -6.78    | 194.49 |
| (4R)-13 | 175  | -5 | -10.1116 | 285.9  | 96.1595  | 218.07 | -46.8234 | 193.12 |
| (4R)-13 | 175  | 0  | -1.3626  | 285.03 | 40.3541  | 214.87 | -31.931  | 193.87 |
| (4R)-13 | 175  | 5  | 7.3861   | 284.19 | -25.5605 | 213.36 | -2.968   | 194.64 |
| (5R)-14 | -175 | -5 | -7.387   | 278.13 | 36.241   | 216.96 | -11.8783 | 182.98 |
| (5R)-14 | -175 | 0  | 5.2061   | 278.82 | -29.8636 | 215.86 | -8.0034  | 182.16 |
| (5R)-14 | -175 | 5  | 17.143   | 279.87 | -112.955 | 216.89 | 55.3638  | 189.67 |
| (5R)-14 | 180  | -5 | -13.3943 | 277.99 | 49.129   | 218.43 | -10.6741 | 183.95 |
| (5R)-14 | 180  | 0  | -0.2805  | 278.62 | -4.2043  | 216.39 | -8.5421  | 182.38 |
| (5R)-14 | 180  | 5  | 12.2982  | 279.54 | -70.3113 | 216.42 | -5.1123  | 182.3  |
| (5R)-14 | 175  | -5 | -20.386  | 277.27 | 39.0158  | 222.42 | -5.697   | 186.84 |
| (5R)-14 | 175  | 0  | -6.3979  | 277.86 | 6.0632   | 218.26 | -6.6863  | 183.73 |
| (5R)-14 | 175  | 5  | 6.8584   | 278.71 | -46.5387 | 217.14 | -4.8314  | 182.7  |
| (5S)-14 | -175 | -5 | -3.6563  | 276.57 | 27.3229  | 214.69 | -6.9945  | 182.92 |
| (5S)-14 | -175 | 0  | 7.9822   | 277.14 | -46.747  | 214.16 | -2.8597  | 182.69 |
| (5S)-14 | -175 | 5  | 19.6242  | 278.15 | -129.220 | 216.05 | 75.5002  | 189.23 |
| (5S)-14 | 180  | -5 | -8.4641  | 276.59 | 54.5945  | 215.25 | -9.3449  | 183.34 |
| (5S)-14 | 180  | 0  | 3.251    | 277.01 | -9.328   | 213.65 | -6.0983  | 182.41 |
| (5S)-14 | 180  | 5  | 14.933   | 277.77 | -81.5984 | 214.25 | -1.886   | 182.99 |
| (5S)-14 | 175  | -5 | -14.187  | 276.24 | 67.7201  | 217.99 | -10.7971 | 185.4  |
| (5S)-14 | 175  | 0  | -1.7932  | 276.52 | 16.3892  | 214.53 | -8.3786  | 183.11 |
| (5S)-14 | 175  | 5  | 10.0194  | 277.13 | -47.0584 | 213.89 | -4.9709  | 182.87 |
| (5R)-15 | -175 | -5 | -5.4594  | 279.18 | 12.7941  | 215.2  | 10.0805  | 185.11 |
| (5R)-15 | -175 | 0  | 5.7007   | 279.98 | -51.6134 | 214.16 | 26.6354  | 189.28 |
| (5R)-15 | -175 | 5  | 16.4659  | 281.03 | -137.981 | 215.39 | 67.4689  | 196.5  |
| (5R)-15 | 180  | -5 | -9.91    | 279.22 | 17.3732  | 216.22 | 43.2932  | 182.68 |
| (5R)-15 | 180  | 0  | 1.3785   | 279.8  | -28.9656 | 214.21 | 27.0364  | 182.24 |
| (5R)-15 | 180  | 5  | 12.5691  | 280.78 | -89.7062 | 214.38 | 38.9712  | 185.74 |
| (5R)-15 | 175  | -5 | -14.5261 | 278.49 | -12.2609 | 220.62 | 110.1588 | 188.09 |
| (5R)-15 | 175  | 0  | -3.037   | 279.04 | -30.1232 | 215.91 | 70.638   | 182.07 |
| (5R)-15 | 175  | 5  | 8.1597   | 279.89 | -72.5529 | 214.71 | 49.1375  | 180.34 |
| (5S)-15 | -175 | -5 | -10.0392 | 275.05 | 45.116   | 214.17 | -8.5617  | 184.07 |
| (5S)-15 | -175 | 0  | -0.9973  | 275.24 | -21.7613 | 213.44 | 17.9014  | 190.18 |
| (5S)-15 | -175 | 5  | 8.358    | 275.7  | -100.978 | 215.75 | 52.5561  | 197.28 |
| (5S)-15 | 180  | -5 | -11.0886 | 275.33 | 61.361   | 215.07 | -9.5826  | 181.05 |

|         |      |    |          |        |          |        |          |        |
|---------|------|----|----------|--------|----------|--------|----------|--------|
| (5S)-15 | 180  | 0  | -2.2924  | 275.38 | 7.6518   | 213.19 | 1.3803   | 180.81 |
| (5S)-15 | 180  | 5  | 6.5581   | 275.72 | -56.4012 | 213.57 | 22.9262  | 186.73 |
| (5S)-15 | 175  | -5 | -11.9831 | 275.32 | 63.8722  | 217.77 | -11.4109 | 182.77 |
| (5S)-15 | 175  | 0  | -3.6088  | 275.22 | 22.4391  | 214.35 | -9.1546  | 180.8  |
| (5S)-15 | 175  | 5  | 5.2422   | 275.4  | -30.6684 | 213.48 | -6.123   | 180.3  |
| (6R)-16 | -175 | -5 | -2.8219  | 278.71 | 39.8768  | 214.58 | -9.9667  | 183.75 |
| (6R)-16 | -175 | 0  | 7.9866   | 279.62 | -33.3535 | 214.01 | -7.7965  | 183.42 |
| (6R)-16 | -175 | 5  | 18.7899  | 281.01 | -116.023 | 215.67 | 64.2121  | 187.58 |
| (6R)-16 | 180  | -5 | -7.0865  | 278.29 | 64.133   | 215.09 | -11.9956 | 184.43 |
| (6R)-16 | 180  | 0  | 3.8486   | 278.99 | 2.6426   | 213.48 | -9.4711  | 183.3  |
| (6R)-16 | 180  | 5  | 14.6103  | 280.08 | -67.7427 | 214.02 | -7.0984  | 183.84 |
| (6R)-16 | 175  | -5 | -11.4637 | 277.58 | 73.8465  | 217.88 | -13.973  | 186.91 |
| (6R)-16 | 175  | 0  | -0.2252  | 278.08 | 25.7372  | 214.35 | -11.3706 | 184.3  |
| (6R)-16 | 175  | 5  | 10.6712  | 278.96 | -35.6115 | 213.69 | -8.818   | 183.87 |
| (6S)-16 | -175 | -5 | -6.1101  | 278.58 | 26.5943  | 215.13 | -5.7342  | 182.5  |
| (6S)-16 | -175 | 0  | 5.3352   | 279.04 | -43.5996 | 214.43 | -2.4864  | 181.88 |
| (6S)-16 | -175 | 5  | 16.975   | 279.83 | -123.529 | 215.99 | 68.6528  | 185.91 |
| (6S)-16 | 180  | -5 | -10.1175 | 278.21 | 45.0151  | 215.47 | -6.4113  | 183.04 |
| (6S)-16 | 180  | 0  | 2.3788   | 278.74 | -16.1954 | 213.93 | -4.0262  | 181.69 |
| (6S)-16 | 180  | 5  | 12.8247  | 279.23 | -80.8529 | 214.3  | -1.315   | 181.96 |
| (6S)-16 | 175  | -5 | -15.0202 | 277.37 | 44.1662  | 217.99 | -6.1653  | 185.29 |
| (6S)-16 | 175  | 0  | -2.5435  | 277.65 | 1.3208   | 214.55 | -4.968   | 182.65 |
| (6S)-16 | 175  | 5  | 9.0244   | 278.27 | -55.2782 | 213.87 | -2.8407  | 181.97 |
| (6R)-17 | -175 | -5 | -9.7118  | 271.35 | 60.2877  | 217.39 | -70.1308 | 180.12 |
| (6R)-17 | -175 | 0  | 4.46     | 271.97 | -5.2639  | 216.86 | -77.3939 | 182.63 |
| (6R)-17 | -175 | 5  | 18.5529  | 273.03 | -81.3602 | 218.08 | -44.6556 | 186.85 |
| (6R)-17 | 180  | -5 | -15.5067 | 271.08 | 83.72    | 217.69 | -13.536  | 180.57 |
| (6R)-17 | 180  | 0  | -1.197   | 271.53 | 26.1133  | 216.44 | -66.7571 | 179.9  |
| (6R)-17 | 180  | 5  | 12.9167  | 272.35 | -38.8834 | 216.99 | -77.4361 | 182.03 |
| (6R)-17 | 175  | -5 | -21.3556 | 270.45 | 92.1933  | 219.64 | -16.5442 | 182.64 |
| (6R)-17 | 175  | 0  | -6.7008  | 270.8  | 46.49    | 216.92 | -13.1556 | 180.26 |
| (6R)-17 | 175  | 5  | 7.4309   | 271.47 | -10.584  | 216.64 | -36.9823 | 179.81 |
| (6S)-17 | -175 | -5 | -3.3348  | 291.88 | 39.9552  | 218.81 | -15.6061 | 180.36 |
| (6S)-17 | -175 | 0  | 5.7054   | 292.65 | -22.71   | 218.5  | 27.1529  | 182.79 |
| (6S)-17 | -175 | 5  | 14.9446  | 293.52 | -94.3576 | 220.22 | 54.336   | 188.24 |

|            |      |    |          |        |          |        |          |        |
|------------|------|----|----------|--------|----------|--------|----------|--------|
| (6S)-17    | 180  | -5 | -5.2372  | 291.03 | 53.1706  | 218.58 | -16.2087 | 180.9  |
| (6S)-17    | 180  | 0  | 3.5984   | 291.81 | 1.3431   | 217.41 | -6.7853  | 179.68 |
| (6S)-17    | 180  | 5  | 12.4917  | 292.68 | -59.3342 | 218.25 | 17.3069  | 181.73 |
| (6S)-17    | 175  | -5 | -6.7637  | 289.69 | 45.5417  | 220.06 | -11.1961 | 182.85 |
| (6S)-17    | 175  | 0  | 1.8022   | 290.49 | 9.8075   | 217.45 | -10.7488 | 180.35 |
| (6S)-17    | 175  | 5  | 10.4238  | 291.39 | -40.3551 | 217.26 | 2.0004   | 180.04 |
| (4S,5R)-18 | -175 | -5 | -2.3582  | 284.58 | -7.2784  | 212.48 | 9.8217   | 179.59 |
| (4S,5R)-18 | -175 | 0  | 7.9126   | 285.25 | -77.2129 | 211.75 | 32.3366  | 187.39 |
| (4S,5R)-18 | -175 | 5  | 18.3209  | 286.28 | -156.431 | 214.5  | 60.327   | 196.9  |
| (4S,5R)-18 | 180  | -5 | -6.5604  | 284.65 | 12.0587  | 213.75 | 16.5488  | 176.22 |
| (4S,5R)-18 | 180  | 0  | 3.7455   | 285.12 | -42.8117 | 211.61 | 36.5606  | 176.8  |
| (4S,5R)-18 | 180  | 5  | 14.0275  | 285.98 | -107.221 | 212.14 | 41.8616  | 183.71 |
| (4S,5R)-18 | 175  | -5 | -11.0435 | 284.17 | 12.7041  | 218.52 | 10.1652  | 179.18 |
| (4S,5R)-18 | 175  | 0  | -0.4567  | 284.59 | -24.7546 | 213.39 | -9.1166  | 176.07 |
| (4S,5R)-18 | 175  | 5  | 9.8969   | 285.33 | -77.9103 | 212.19 | -39.7191 | 175.84 |
| (4S,5S)-18 | -175 | -5 | -5.8594  | 285.91 | 21.6021  | 213.63 | -17.971  | 179.47 |
| (4S,5S)-18 | -175 | 0  | 4.1119   | 286.81 | -37.5736 | 212.47 | 7.0640   | 187.78 |
| (4S,5S)-18 | -175 | 5  | 14.0525  | 288.06 | -130.999 | 214.12 | 59.793   | 198.53 |
| (4S,5S)-18 | 180  | -5 | -10.4129 | 285.71 | 23.9415  | 215.97 | 25.5969  | 177.2  |
| (4S,5S)-18 | 180  | 0  | -0.0993  | 286.48 | -12.5944 | 213.31 | 6.0908   | 176.66 |
| (4S,5S)-18 | 180  | 5  | 9.8324   | 287.54 | -68.0225 | 213.35 | 19.8283  | 184.3  |
| (4S,5S)-18 | 175  | -5 | -15.5773 | 284.91 | -9.7189  | 223.01 | 74.3378  | 182.45 |
| (4S,5S)-18 | 175  | 0  | -4.5509  | 285.64 | -15.4697 | 216.33 | 9.5227   | 177.12 |
| (4S,5S)-18 | 175  | 5  | 5.6763   | 286.61 | -48.7063 | 214.41 | -10.1332 | 175.67 |
| (4R,5S)-18 | -175 | -5 | -8.7096  | 287    | 103.273  | 216.95 | -22.3926 | 179.77 |
| (4R,5S)-18 | -175 | 0  | 1.0669   | 287.61 | 52.4278  | 214.76 | -13.4501 | 187.45 |
| (4R,5S)-18 | -175 | 5  | 11.0376  | 288.63 | -34.5819 | 214.65 | 33.4089  | 198.36 |
| (4R,5S)-18 | 180  | -5 | -11.9765 | 286.9  | 107.2516 | 219.12 | 54.2542  | 178.76 |
| (4R,5S)-18 | 180  | 0  | -2.5914  | 287.27 | 70.7958  | 215.66 | 12.5346  | 176.81 |
| (4R,5S)-18 | 180  | 5  | 7.1454   | 288.02 | 14.5268  | 214.64 | 13.833   | 183.73 |
| (4R,5S)-18 | 175  | -5 | -15.6056 | 286.42 | 77.9835  | 227.48 | 57.0222  | 192.27 |
| (4R,5S)-18 | 175  | 0  | -6.0413  | 286.63 | 71.683   | 218.85 | 45.9568  | 180.15 |
| (4R,5S)-18 | 175  | 5  | 3.3037   | 287.16 | 31.6605  | 215.91 | -18.1717 | 175.93 |
| (4R,5R)-18 | -175 | -5 | -5.691   | 284.55 | 65.745   | 213.47 | -10.9062 | 179.53 |
| (4R,5R)-18 | -175 | 0  | 4.2168   | 284.82 | 3.5028   | 211.55 | 14.534   | 186.64 |

|            |      |    |          |        |          |        |          |        |
|------------|------|----|----------|--------|----------|--------|----------|--------|
| (4R,5R)-18 | -175 | 5  | 14.4808  | 285.59 | -87.49   | 212.52 | 64.2811  | 195.94 |
| (4R,5R)-18 | 180  | -5 | -9.8502  | 284.46 | 80.4373  | 215.29 | 10.861   | 177.03 |
| (4R,5R)-18 | 180  | 0  | 0.0429   | 284.67 | 32.4847  | 211.92 | 16.8148  | 176.87 |
| (4R,5R)-18 | 180  | 5  | 9.9443   | 285.13 | -32.0847 | 211.24 | 36.7224  | 183.1  |
| (4R,5R)-18 | 175  | -5 | -13.8575 | 283.76 | 71.6864  | 221.87 | 57.9666  | 183.34 |
| (4R,5R)-18 | 175  | 0  | -3.8201  | 283.97 | 46.3544  | 214.45 | -10.6432 | 176.78 |
| (4R,5R)-18 | 175  | 5  | 5.9847   | 284.39 | -4.2077  | 211.82 | -37.7547 | 176.11 |
| (4R,5R)-19 | -175 | -5 | -8.6086  | 285.41 | -31.763  | 211.8  | 73.8161  | 197.47 |
| (4R,5R)-19 | -175 | 0  | -1.2791  | 285.32 | -72.059  | 216.93 | 75.4457  | 197.59 |
| (4R,5R)-19 | -175 | 5  | 7.0063   | 285.55 | -80.406  | 227.28 | 36.7354  | 197.27 |
| (4R,5R)-19 | 180  | -5 | -9.5481  | 285.72 | 6.8485   | 210.84 | 43.5546  | 191.47 |
| (4R,5R)-19 | 180  | 0  | -2.6478  | 285.57 | -54.5739 | 210.61 | 70.4302  | 193.17 |
| (4R,5R)-19 | 180  | 5  | 4.6592   | 285.72 | -90.055  | 215.91 | 65.4195  | 194.36 |
| (4R,5R)-19 | 175  | -5 | -9.9567  | 285.63 | 10.4633  | 214.48 | 54.1847  | 188.19 |
| (4R,5R)-19 | 175  | 0  | -3.6977  | 285.31 | -28.041  | 210.3  | 54.7947  | 187.79 |
| (4R,5R)-19 | 175  | 5  | 3.1392   | 285.33 | -77.680  | 211.06 | 67.7127  | 189.49 |
| (4R,5S)-19 | -175 | -5 | -3.3049  | 289.86 | -96.3109 | 211.59 | 118.0886 | 197.74 |
| (4R,5S)-19 | -175 | 0  | 5.7065   | 290.4  | -147.664 | 215.48 | 132.8048 | 198.8  |
| (4R,5S)-19 | -175 | 5  | 15.3467  | 291.31 | -145.90  | 225.3  | 86.4856  | 199.4  |
| (4R,5S)-19 | 180  | -5 | -7.5549  | 289.68 | -43.044  | 211.55 | 82.0928  | 191.56 |
| (4R,5S)-19 | 180  | 0  | 1.181    | 290.09 | -108.341 | 210.38 | 113.5629 | 193    |
| (4R,5S)-19 | 180  | 5  | 10.0138  | 290.98 | -157.881 | 214.41 | 126.8853 | 195.17 |
| (4R,5S)-19 | 175  | -5 | -11.1619 | 289.02 | -49.2127 | 216.8  | 123.3321 | 189.98 |
| (4R,5S)-19 | 175  | 0  | -2.6848  | 289.27 | -72.348  | 211.02 | 94.3169  | 187.56 |
| (4R,5S)-19 | 175  | 5  | 5.9122   | 290    | -123.033 | 210.88 | 113.0348 | 189.05 |
| (4S,5S)-19 | -175 | -5 | -10.1897 | 295.08 | 112.1418 | 217.37 | -78.8761 | 202.43 |
| (4S,5S)-19 | -175 | 0  | -1.811   | 295.2  | 86.5739  | 216.55 | -95.2261 | 205.05 |
| (4S,5S)-19 | -175 | 5  | 6.9083   | 295.63 | 26.9018  | 222.45 | -78.5222 | 208.04 |
| (4S,5S)-19 | 180  | -5 | -12.3068 | 295.45 | 111.4583 | 217.4  | -60.1419 | 202.42 |
| (4S,5S)-19 | 180  | 0  | -4.6919  | 294.88 | 105.2849 | 213.43 | -99.1936 | 201.15 |
| (4S,5S)-19 | 180  | 5  | 3.3249   | 295.11 | 93.2022  | 212.46 | -128.034 | 204.73 |
| (4S,5S)-19 | 175  | -5 | -13.4088 | 295.38 | 47.7383  | 224.8  | 23.1961  | 209.21 |
| (4S,5S)-19 | 175  | 0  | -6.6868  | 294.8  | 96.3221  | 214.38 | -71.6178 | 203.17 |
| (4S,5S)-19 | 175  | 5  | 0.6083   | 294.7  | 84.8028  | 210.76 | -104.734 | 201.44 |
| (4S,5R)-19 | -175 | -5 | -12.0372 | 289.37 | 93.3918  | 211.48 | -36.1322 | 200.98 |

|                   |      |    |          |        |          |        |          |        |
|-------------------|------|----|----------|--------|----------|--------|----------|--------|
| <b>(4S,5R)-19</b> | -175 | 0  | -4.1682  | 288.87 | 39.5095  | 210.57 | -18.2231 | 206.88 |
| <b>(4S,5R)-19</b> | -175 | 5  | -1.2069  | 288.74 | 27.7899  | 206.75 | -23.3665 | 197.05 |
| <b>(4S,5R)-19</b> | 180  | -5 | -14.1573 | 290.05 | 101.9244 | 211.66 | -35.5228 | 196.33 |
| <b>(4S,5R)-19</b> | 180  | 0  | -6.5099  | 289.23 | 71.0431  | 208.26 | -40.6199 | 198.44 |
| <b>(4S,5R)-19</b> | 180  | 5  | 1.2102   | 288.91 | -14.6365 | 206.75 | 8.3735   | 205.68 |
| <b>(4S,5R)-19</b> | 175  | -5 | -16.2889 | 290.51 | 98.349   | 213.71 | -13.985  | 204.07 |
| <b>(4S,5R)-19</b> | 175  | 0  | -8.6934  | 289.37 | 80.1008  | 208.73 | -38.3627 | 196.54 |
| <b>(4S,5R)-19</b> | 175  | 5  | -1.2069  | 288.74 | 27.7899  | 206.75 | -23.3665 | 197.05 |
| <b>(4S,6S)-20</b> | -175 | -5 | -3.6019  | 286.35 | -16.7046 | 211.45 | 4.6285   | 177.81 |
| <b>(4S,6S)-20</b> | -175 | 0  | 6.1258   | 286.84 | -83.3465 | 210.66 | 27.885   | 184.94 |
| <b>(4S,6S)-20</b> | -175 | 5  | 15.9935  | 287.65 | -161.688 | 212.89 | 60.3521  | 193.73 |
| <b>(4S,6S)-20</b> | 180  | -5 | -7.0838  | 285.98 | -6.6578  | 212.63 | 29.6503  | 175.78 |
| <b>(4S,6S)-20</b> | 180  | 0  | 2.8058   | 286.38 | -56.0608 | 210.45 | 27.4669  | 175.16 |
| <b>(4S,6S)-20</b> | 180  | 5  | 12.4361  | 287.09 | -116.426 | 210.91 | 35.03    | 181.95 |
| <b>(4S,6S)-20</b> | 175  | -5 | -11.2567 | 284.89 | -22.7899 | 217.54 | 15.8516  | 179.18 |
| <b>(4S,6S)-20</b> | 175  | 0  | -0.7092  | 285.32 | -50.8997 | 212.27 | 11.1213  | 175.47 |
| <b>(4S,6S)-20</b> | 175  | 5  | 9.1006   | 286.04 | -95.7375 | 211    | -21.0113 | 174.52 |
| <b>(4S,6R)-20</b> | -175 | -5 | -3.3278  | 285.64 | 20.1787  | 211.19 | 19.0811  | 176.26 |
| <b>(4S,6R)-20</b> | -175 | 0  | 5.0814   | 286.19 | -31.69   | 210.9  | -23.0759 | 175.87 |
| <b>(4S,6R)-20</b> | -175 | 5  | 14.2433  | 286.35 | -58.0177 | 213.56 | -75.748  | 184.68 |
| <b>(4S,6R)-20</b> | 180  | -5 | -4.1083  | 286.13 | 30.1666  | 211.38 | -13.4919 | 181.65 |
| <b>(4S,6R)-20</b> | 180  | 0  | 3.6525   | 286.61 | -26.9045 | 210.58 | -10.8938 | 176.04 |
| <b>(4S,6R)-20</b> | 180  | 5  | 12.1826  | 287.04 | -73.7369 | 211.9  | -24.1303 | 177.18 |
| <b>(4S,6R)-20</b> | 175  | -5 | -4.6286  | 286.43 | 40.9511  | 212.02 | -10.2687 | 189.72 |
| <b>(4S,6R)-20</b> | 175  | 0  | 2.5726   | 286.62 | -15.4173 | 210.61 | 0.3002   | 179.71 |
| <b>(4S,6R)-20</b> | 175  | 5  | 10.5378  | 287.09 | -70.9037 | 211.49 | -29.8282 | 177.22 |
| <b>(4R,6R)-20</b> | -175 | -5 | -4.9585  | 287.44 | 90.506   | 214.6  | -8.5827  | 178.41 |
| <b>(4R,6R)-20</b> | -175 | 0  | 4.2708   | 288.14 | 28.9357  | 212.63 | 4.9391   | 185.92 |
| <b>(4R,6R)-20</b> | -175 | 5  | 13.5983  | 289.4  | -63.7667 | 213.15 | 53.3203  | 195.74 |
| <b>(4R,6R)-20</b> | 180  | -5 | -7.3137  | 287.07 | 109.6827 | 216.06 | -0.2447  | 177.51 |
| <b>(4R,6R)-20</b> | 180  | 0  | 1.113    | 287.49 | 59.7178  | 212.88 | -16.3104 | 176.35 |
| <b>(4R,6R)-20</b> | 180  | 5  | 10.1958  | 288.33 | -6.7096  | 212.11 | 21.168   | 182.64 |
| <b>(4R,6R)-20</b> | 175  | -5 | -9.1006  | 286.6  | 112.7711 | 222    | 15.7158  | 185.14 |
| <b>(4R,6R)-20</b> | 175  | 0  | -1.0563  | 286.69 | 79.1014  | 215.1  | -21.8587 | 177.19 |
| <b>(4R,6R)-20</b> | 175  | 5  | 7.3869   | 287.23 | 23.9015  | 212.66 | -42.5525 | 176.84 |

|            |      |    |          |        |          |        |          |        |
|------------|------|----|----------|--------|----------|--------|----------|--------|
| (4R,6S)-20 | -175 | -5 | -3.9852  | 284.19 | 71.9499  | 212.9  | -21.9205 | 176.91 |
| (4R,6S)-20 | -175 | 0  | 3.5437   | 283.1  | 22.0678  | 211.51 | -2.673   | 175.48 |
| (4R,6S)-20 | -175 | 5  | 11.9042  | 281.9  | -18.0754 | 214.14 | -25.8541 | 192.76 |
| (4R,6S)-20 | 180  | -5 | -4.7757  | 285.9  | 82.0978  | 213.54 | -21.1038 | 180.99 |
| (4R,6S)-20 | 180  | 0  | 2.1794   | 284.73 | 31.7649  | 211.33 | 4.2752   | 176.25 |
| (4R,6S)-20 | 180  | 5  | 9.8797   | 283.59 | -21.5193 | 211.62 | -38.7364 | 175.8  |
| (4R,6S)-20 | 175  | -5 | -5.5346  | 287.43 | 89.7313  | 214.5  | -8.8883  | 186.72 |
| (4R,6S)-20 | 175  | 0  | 1.0144   | 286.07 | 42.7727  | 211.61 | -12.7908 | 179.14 |
| (4R,6S)-20 | 175  | 5  | 8.4192   | 284.85 | -13.8435 | 211.25 | 12.5742  | 175.97 |
| (4S,6S)-21 | -175 | -5 | -1.9092  | 302.29 | -30.5574 | 213.69 | 69.2102  | 194.59 |
| (4S,6S)-21 | -175 | 0  | 5.9067   | 302.67 | -96.4202 | 216.9  | 99.1075  | 196.23 |
| (4S,6S)-21 | -175 | 5  | 14.5521  | 303.26 | -125.062 | 224.8  | 79.66    | 197.05 |
| (4S,6S)-21 | 180  | -5 | -4.5299  | 301.8  | 3.4959   | 212.89 | 38.1697  | 189.41 |
| (4S,6S)-21 | 180  | 0  | 2.9348   | 302.11 | -61.2146 | 212.62 | 79.8667  | 191.52 |
| (4S,6S)-21 | 180  | 5  | 10.5405  | 302.77 | -111.583 | 216.94 | 89.9994  | 193.35 |
| (4S,6S)-21 | 175  | -5 | -6.5254  | 300.78 | -0.2343  | 215.83 | 26.2585  | 185.99 |
| (4S,6S)-21 | 175  | 0  | 0.4548   | 301.17 | -37.9916 | 212.03 | 57.367   | 186.97 |
| (4S,6S)-21 | 175  | 5  | 7.797    | 301.71 | -90.3161 | 213.07 | 84.5599  | 188.78 |
| (4S,6R)-21 | -175 | -5 | -5.7496  | 279.29 | 4.0797   | 210.35 | -0.5257  | 192.83 |
| (4S,6R)-21 | -175 | 0  | 5.3197   | 280.19 | -45.1418 | 209.87 | -9.762   | 193.26 |
| (4S,6R)-21 | -175 | 5  | 15.704   | 280.52 | -30.0885 | 211.36 | -91.3134 | 202.62 |
| (4S,6R)-21 | 180  | -5 | -8.0257  | 279.02 | 5.4148   | 210.53 | 19.8347  | 194.91 |
| (4S,6R)-21 | 180  | 0  | 3.0585   | 280.17 | -55.1705 | 210.04 | 36.8944  | 191.86 |
| (4S,6R)-21 | 180  | 5  | 13.6735  | 280.98 | -96.2581 | 210.73 | 15.8813  | 193.71 |
| (4S,6R)-21 | 175  | -5 | -10.2579 | 278.43 | 12.4053  | 210.79 | 27.3354  | 199.34 |
| (4S,6R)-21 | 175  | 0  | 0.6784   | 279.46 | -52.0819 | 210.4  | 52.2646  | 192.87 |
| (4S,6R)-21 | 175  | 5  | 11.4845  | 280.59 | -101.398 | 211.12 | 61.2603  | 190.79 |
| (4R,6R)-21 | -175 | -5 | -6.6397  | 297.21 | 86.7575  | 214.45 | -48.4044 | 194.5  |
| (4R,6R)-21 | -175 | 0  | 1.7244   | 297.16 | 52.863   | 211.31 | -57.8465 | 199.54 |
| (4R,6R)-21 | -175 | 5  | 10.7212  | 297.66 | 3.4328   | 210.1  | -57.9859 | 208.39 |
| (4R,6R)-21 | 180  | -5 | -8.8214  | 297.67 | 86.0506  | 215.69 | -36.6426 | 193.84 |
| (4R,6R)-21 | 180  | 0  | -1.1395  | 297.2  | 59.5502  | 211.73 | -65.1701 | 192.54 |
| (4R,6R)-21 | 180  | 5  | 7.0391   | 297.38 | 9.2823   | 210.07 | -52.8184 | 196.98 |
| (4R,6R)-21 | 175  | -5 | -9.9077  | 297.85 | 44.4804  | 221.12 | 43.0529  | 203.84 |
| (4R,6R)-21 | 175  | 0  | -3.2565  | 297.12 | 60.9628  | 213.11 | -44.3474 | 194.95 |

|                   |      |    |          |        |          |        |          |        |
|-------------------|------|----|----------|--------|----------|--------|----------|--------|
| <b>(4R,6R)-21</b> | 175  | 5  | 4.2624   | 296.96 | 21.324   | 210.41 | -42.0952 | 192.71 |
| <b>(4R,6S)-21</b> | -175 | -5 | -2.7597  | 308.06 | 48.1735  | 214.65 | 12.4833  | 200.6  |
| <b>(4R,6S)-21</b> | -175 | 0  | 0.6282   | 304.9  | 42.3558  | 211.83 | -43.1836 | 193.83 |
| <b>(4R,6S)-21</b> | -175 | 5  | 4.6177   | 304.81 | 18.7314  | 211.8  | -30.2327 | 205.7  |
| <b>(4R,6S)-21</b> | 180  | -5 | -2.8239  | 306.64 | 67.1953  | 215.53 | -11.4977 | 194.62 |
| <b>(4R,6S)-21</b> | 180  | 0  | 1.1765   | 305.64 | 46.5955  | 211.89 | -51.4754 | 194.54 |
| <b>(4R,6S)-21</b> | 180  | 5  | 5.0977   | 304.91 | 4.1667   | 210.54 | -32.4622 | 195.67 |
| <b>(4R,6S)-21</b> | 175  | -5 | -2.3463  | 308.06 | 58.1562  | 216.55 | 34.752   | 197.34 |
| <b>(4R,6S)-21</b> | 175  | 0  | 1.6771   | 306.51 | 47.697   | 212.22 | -42.6387 | 195.33 |
| <b>(4R,6S)-21</b> | 175  | 5  | 5.5724   | 305.36 | 6.8467   | 210.31 | -33.8524 | 196.16 |
| <b>(5S,6R)-22</b> | -175 | -5 | -2.9162  | 286.68 | 33.9784  | 210.54 | 14.8984  | 178.87 |
| <b>(5S,6R)-22</b> | -175 | 0  | 6.0834   | 287.6  | -35.1433 | 210.05 | 37.0877  | 185.26 |
| <b>(5S,6R)-22</b> | -175 | 5  | 15.3844  | 288.85 | -120.233 | 212.58 | 76.2763  | 192.92 |
| <b>(5S,6R)-22</b> | 180  | -5 | -6.0876  | 286.48 | 53.988   | 211.62 | 7.9223   | 177.75 |
| <b>(5S,6R)-22</b> | 180  | 0  | 2.4216   | 287.03 | 1.256    | 209.69 | -16.4844 | 176.62 |
| <b>(5S,6R)-22</b> | 180  | 5  | 11.4386  | 288.14 | -64.1203 | 210.41 | 50.4039  | 181.9  |
| <b>(5S,6R)-22</b> | 175  | -5 | -8.3182  | 285.75 | 51.9292  | 216.01 | 4.7051   | 180.74 |
| <b>(5S,6R)-22</b> | 175  | 0  | -0.4036  | 286.27 | 19.3469  | 211.37 | -11.9081 | 177.81 |
| <b>(5S,6R)-22</b> | 175  | 5  | 8.2527   | 287.02 | -32.3234 | 210.35 | -35.226  | 177.54 |
| <b>(5S,6S)-22</b> | -175 | -5 | -2.06    | 286.7  | 5.7022   | 210.35 | 3.6182   | 177.01 |
| <b>(5S,6S)-22</b> | -175 | 0  | 7.0714   | 287.09 | -62.0103 | 209.55 | 28.0654  | 183.06 |
| <b>(5S,6S)-22</b> | -175 | 5  | 15.2064  | 287.38 | -138.988 | 211.58 | 64.2722  | 190.94 |
| <b>(5S,6S)-22</b> | 180  | -5 | -5.8621  | 286.58 | 25.6326  | 211.51 | 15.6311  | 176.2  |
| <b>(5S,6S)-22</b> | 180  | 0  | 3.4134   | 286.89 | -28.6933 | 209.38 | -9.2739  | 175.04 |
| <b>(5S,6S)-22</b> | 180  | 5  | 12.7116  | 287.63 | -91.235  | 209.8  | 42.7037  | 179.8  |
| <b>(5S,6S)-22</b> | 175  | -5 | -9.8056  | 285.97 | 27.8016  | 215.89 | 10.7245  | 179.02 |
| <b>(5S,6S)-22</b> | 175  | 0  | -0.2293  | 286.31 | -9.4623  | 211.18 | -5.92    | 176.04 |
| <b>(5S,6S)-22</b> | 175  | 5  | 8.9802   | 286.86 | -62.5434 | 209.94 | -34.0708 | 175.8  |
| <b>(5R,6S)-22</b> | -175 | -5 | -7.2929  | 288.27 | 22.1391  | 212.97 | -22.2589 | 176.98 |
| <b>(5R,6S)-22</b> | -175 | 0  | 2.0185   | 288.69 | -31.1394 | 211.64 | -5.3546  | 183.73 |
| <b>(5R,6S)-22</b> | -175 | 5  | 11.5053  | 289.5  | -110.603 | 212.65 | 41.4738  | 192.44 |
| <b>(5R,6S)-22</b> | 180  | -5 | -11.1214 | 287.76 | 20.2084  | 214.75 | 19.5076  | 177.24 |
| <b>(5R,6S)-22</b> | 180  | 0  | -1.3695  | 288.33 | -13.9732 | 212.26 | 5.1489   | 175.37 |
| <b>(5R,6S)-22</b> | 180  | 5  | 8.0888   | 289.08 | -65.5933 | 212.14 | 10.386   | 180.65 |
| <b>(5R,6S)-22</b> | 175  | -5 | -15.4398 | 286.56 | -15.4565 | 220.34 | 92.873   | 181.52 |

|            |      |    |          |        |          |        |          |        |
|------------|------|----|----------|--------|----------|--------|----------|--------|
| (5R,6S)-22 | 175  | 0  | -5.2088  | 287.16 | -21.9803 | 214.81 | 9.0567   | 177.09 |
| (5R,6S)-22 | 175  | 5  | 4.4499   | 288.03 | -53.4408 | 213.07 | -8.8318  | 175.65 |
| (5R,6R)-22 | -175 | -5 | -5.4034  | 287.65 | 29.5998  | 213.04 | 11.802   | 178.44 |
| (5R,6R)-22 | -175 | 0  | 4.2157   | 288.54 | -33.0145 | 211.55 | 21.849   | 185.18 |
| (5R,6R)-22 | -175 | 5  | 13.6576  | 289.85 | -122.637 | 212.93 | 72.1875  | 193.92 |
| (5R,6R)-22 | 180  | -5 | -9.2995  | 287.49 | 35.4464  | 215.88 | 17.4788  | 179.29 |
| (5R,6R)-22 | 180  | 0  | 0.2335   | 288.22 | -3.4026  | 212.71 | 3.4246   | 177.19 |
| (5R,6R)-22 | 180  | 5  | 9.7709   | 289.32 | -61.6822 | 212.27 | 34.0412  | 181.57 |
| (5R,6R)-22 | 175  | -5 | -13.0656 | 286.52 | 14.8233  | 223.53 | 20.3772  | 184.09 |
| (5R,6R)-22 | 175  | 0  | -3.6504  | 287.26 | 2.66     | 216.52 | 7.2955   | 179.56 |
| (5R,6R)-22 | 175  | 5  | 5.7389   | 288.32 | -35.8402 | 213.98 | -12.2826 | 177.91 |
| (5S,6R)-23 | -175 | -5 | -13.0937 | 275.85 | 72.5857  | 212.86 | -57.1526 | 193.51 |
| (5S,6R)-23 | -175 | 0  | -3.913   | 275.88 | 15.1118  | 211.78 | -39.2274 | 198.4  |
| (5S,6R)-23 | -175 | 5  | 6.4933   | 276.17 | -87.746  | 213.64 | 25.5138  | 203.94 |
| (5S,6R)-23 | 180  | -5 | -13.9703 | 276.07 | 80.4128  | 214.06 | -55.0165 | 188.45 |
| (5S,6R)-23 | 180  | 0  | -5.4062  | 276.03 | 41.9705  | 212.12 | -58.4326 | 191.65 |
| (5S,6R)-23 | 180  | 5  | 3.6283   | 276.27 | -13.2573 | 212.2  | -43.5569 | 196.29 |
| (5S,6R)-23 | 175  | -5 | -13.0414 | 275.86 | 69.683   | 217.1  | -45.3932 | 185.5  |
| (5S,6R)-23 | 175  | 0  | -5.8227  | 275.8  | 45.9786  | 213.61 | -53.6853 | 187.3  |
| (5S,6R)-23 | 175  | 5  | 2.2869   | 275.96 | 7.7737   | 212.7  | -57.4019 | 190.23 |
| (5S,6S)-23 | -175 | -5 | -8.6218  | 298.03 | 41.9634  | 213.31 | -7.1423  | 192.86 |
| (5S,6S)-23 | -175 | 0  | -3.0774  | 297.98 | -18.6811 | 212.53 | 11.2746  | 197.69 |
| (5S,6S)-23 | -175 | 5  | 2.945    | 297.99 | -92.49   | 215.59 | 42.8705  | 202.05 |
| (5S,6S)-23 | 180  | -5 | -7.3227  | 298.06 | 48.1105  | 214.15 | -4.1861  | 186.61 |
| (5S,6S)-23 | 180  | 0  | -2.2721  | 297.99 | 6.9322   | 212.06 | -4.9265  | 190.29 |
| (5S,6S)-23 | 180  | 5  | 2.9276   | 298.03 | -49.1741 | 212.4  | 7.6916   | 195.04 |
| (5S,6S)-23 | 175  | -5 | -5.3436  | 297.59 | 35.1118  | 217.1  | -0.6289  | 182.74 |
| (5S,6S)-23 | 175  | 0  | -1.0685  | 297.52 | 8.5828   | 213.37 | -0.2392  | 184.79 |
| (5S,6S)-23 | 175  | 5  | 3.8244   | 297.55 | -31.1707 | 212.28 | -3.1215  | 188.24 |
| (5R,6S)-23 | -175 | -5 | -4.5958  | 304.86 | 2.4424   | 216.09 | 28.9301  | 199.33 |
| (5R,6S)-23 | -175 | 0  | 2.6681   | 305.37 | -54.9579 | 214.94 | 40.2002  | 201.53 |
| (5R,6S)-23 | -175 | 5  | 10.0709  | 305.99 | -130.091 | 216.86 | 67.0131  | 205.24 |
| (5R,6S)-23 | 180  | -5 | -7.026   | 304.37 | 3.4426   | 217.82 | 27.9894  | 197.24 |
| (5R,6S)-23 | 180  | 0  | 0.6847   | 304.78 | -30.5422 | 215.00 | 21.1321  | 197.54 |
| (5R,6S)-23 | 180  | 5  | 7.789    | 305.49 | -82.3365 | 214.88 | 28.375   | 199.28 |



|                   |      |    |          |        |          |        |          |        |
|-------------------|------|----|----------|--------|----------|--------|----------|--------|
| <b>(5R,6S)-23</b> | 175  | -5 | -10.1159 | 303.18 | -28.5448 | 225.52 | 60.8094  | 197.75 |
| <b>(5R,6S)-23</b> | 175  | 0  | -2.1433  | 303.69 | -35.3436 | 218.12 | 22.2566  | 196.12 |
| <b>(5R,6S)-23</b> | 175  | 5  | 5.6775   | 304.22 | -66.5922 | 215.68 | 13.9464  | 196.2  |
| <b>(5R,6R)-23</b> | -175 | -5 | -7.9505  | 283.61 | 31.5406  | 213.11 | -26.4497 | 189.49 |
| <b>(5R,6R)-23</b> | -175 | 0  | 1.6802   | 284.04 | -15.3417 | 211.93 | -26.1836 | 191.43 |
| <b>(5R,6R)-23</b> | -175 | 5  | 11.244   | 284.82 | -87.6442 | 212.82 | 12.4595  | 196.15 |
| <b>(5R,6R)-23</b> | 180  | -5 | -11.0408 | 283.45 | 20.1743  | 214.81 | 13.2285  | 188.99 |
| <b>(5R,6R)-23</b> | 180  | 0  | -1.5026  | 283.92 | -5.3384  | 212.28 | -21.0915 | 188.4  |
| <b>(5R,6R)-23</b> | 180  | 5  | 7.8523   | 284.6  | -48.8792 | 212.18 | -28.0421 | 189.67 |
| <b>(5R,6R)-23</b> | 175  | -5 | -13.0452 | 282.72 | -30.1118 | 221.92 | 114.5268 | 192.02 |
| <b>(5R,6R)-23</b> | 175  | 0  | -4.1579  | 283.15 | -26.6546 | 215.09 | 37.009   | 188.53 |
| <b>(5R,6R)-23</b> | 175  | 5  | 4.9764   | 283.8  | -47.6624 | 213.02 | -8.4924  | 187.69 |

---

[a]  $\times 10^{-40}$  erg esu cm Gauss<sup>-1</sup>; [b]  $\alpha = 40^\circ$ ; [c]  $\beta = 178^\circ$

**Table E.** Relative energies ( $\Delta E$ ) of **4** with varying torsion angles  $\omega$  and  $\tau$ .

|          | $\omega$ | $\tau$ | Energy [Hartree] | $\Delta E$ [kcal mol <sup>-1</sup> ] |
|----------|----------|--------|------------------|--------------------------------------|
| <b>4</b> | -175     | -5     | -308.111566373   | 1.39                                 |
| <b>4</b> | -175     | -4     | -308.112628255   | 0.72                                 |
| <b>4</b> | -175     | -3     | -308.112853555   | 0.58                                 |
| <b>4</b> | -175     | -2     | -308.112208187   | 0.99                                 |
| <b>4</b> | -175     | -1     | -308.110669596   | 1.95                                 |
| <b>4</b> | -175     | 0      | -308.108215133   | 3.49                                 |
| <b>4</b> | -175     | 1      | -308.104839089   | 5.61                                 |
| <b>4</b> | -175     | 2      | -308.100544590   | 8.31                                 |
| <b>4</b> | -175     | 3      | -308.095334679   | 11.57                                |
| <b>4</b> | -175     | 4      | -308.089234085   | 15.40                                |
| <b>4</b> | -175     | 5      | -308.082271769   | 19.77                                |
| <b>4</b> | -176     | -5     | -308.110757224   | 1.90                                 |
| <b>4</b> | -176     | -4     | -308.112328904   | 0.91                                 |
| <b>4</b> | -176     | -3     | -308.113090060   | 0.43                                 |
| <b>4</b> | -176     | -2     | -308.113006199   | 0.49                                 |
| <b>4</b> | -176     | -1     | -308.112044599   | 1.09                                 |
| <b>4</b> | -176     | 0      | -308.110185739   | 2.26                                 |
| <b>4</b> | -176     | 1      | -308.107412304   | 4.00                                 |
| <b>4</b> | -176     | 2      | -308.103725441   | 6.31                                 |
| <b>4</b> | -176     | 3      | -308.099126091   | 9.20                                 |
| <b>4</b> | -176     | 4      | -308.093629457   | 12.64                                |
| <b>4</b> | -176     | 5      | -308.087255995   | 16.64                                |
| <b>4</b> | -177     | -5     | -308.109565128   | 2.65                                 |
| <b>4</b> | -177     | -4     | -308.111629309   | 1.35                                 |
| <b>4</b> | -177     | -3     | -308.112913769   | 0.54                                 |
| <b>4</b> | -177     | -2     | -308.113376623   | 0.25                                 |
| <b>4</b> | -177     | -1     | -308.112986017   | 0.50                                 |
| <b>4</b> | -177     | 0      | -308.111714605   | 1.30                                 |
| <b>4</b> | -177     | 1      | -308.109543716   | 2.66                                 |
| <b>4</b> | -177     | 2      | -308.106461713   | 4.59                                 |
| <b>4</b> | -177     | 3      | -308.102473918   | 7.09                                 |
| <b>4</b> | -177     | 4      | -308.097586438   | 10.16                                |
| <b>4</b> | -177     | 5      | -308.091817402   | 13.78                                |

|   |      |    |                |       |
|---|------|----|----------------|-------|
| 4 | -178 | -5 | -308.108001912 | 3.63  |
| 4 | -178 | -4 | -308.110540154 | 2.03  |
| 4 | -178 | -3 | -308.112329586 | 0.91  |
| 4 | -178 | -2 | -308.113326806 | 0.28  |
| 4 | -178 | -1 | -308.113394411 | 0.24  |
| 4 | -178 | 0  | -308.112801086 | 0.61  |
| 4 | -178 | 1  | -308.111225202 | 1.60  |
| 4 | -178 | 2  | -308.108750948 | 3.16  |
| 4 | -178 | 3  | -308.105374461 | 5.27  |
| 4 | -178 | 4  | -308.101097161 | 7.96  |
| 4 | -178 | 5  | -308.095939445 | 11.20 |
| 4 | -179 | -5 | -308.106079756 | 4.83  |
| 4 | -179 | -4 | -308.109073153 | 2.95  |
| 4 | -179 | -3 | -308.111348331 | 1.53  |
| 4 | -179 | -2 | -308.112862906 | 0.58  |
| 4 | -179 | -1 | -308.113574818 | 0.13  |
| 4 | -179 | 0  | -308.113449429 | 0.21  |
| 4 | -179 | 1  | -308.112459881 | 0.83  |
| 4 | -179 | 2  | -308.110587262 | 2.00  |
| 4 | -179 | 3  | -308.107819063 | 3.74  |
| 4 | -179 | 4  | -308.104161700 | 6.04  |
| 4 | -179 | 5  | -308.099614816 | 8.89  |
| 4 | 180  | -5 | -308.113743585 | 0.02  |
| 4 | 180  | -4 | -308.113773745 | 0.01  |
| 4 | 180  | -3 | -308.113781143 | 0.00  |
| 4 | 180  | -2 | -308.113766593 | 0.01  |
| 4 | 180  | -1 | -308.113725769 | 0.03  |
| 4 | 180  | 0  | -308.113664444 | 0.07  |
| 4 | 180  | 1  | -308.113582175 | 0.12  |
| 4 | 180  | 2  | -308.113477333 | 0.19  |
| 4 | 180  | 3  | -308.113350013 | 0.27  |
| 4 | 180  | 4  | -308.113200491 | 0.36  |
| 4 | 180  | 5  | -308.113028071 | 0.47  |
| 4 | 179  | -5 | -308.101221770 | 7.88  |
| 4 | 179  | -4 | -308.105056732 | 5.47  |

|   |     |    |                |       |
|---|-----|----|----------------|-------|
| 4 | 179 | -3 | -308.108244292 | 3.47  |
| 4 | 179 | -2 | -308.110736082 | 1.91  |
| 4 | 179 | -1 | -308.112486360 | 0.81  |
| 4 | 179 | 0  | -308.113453172 | 0.21  |
| 4 | 179 | 1  | -308.113602707 | 0.11  |
| 4 | 179 | 2  | -308.112907375 | 0.55  |
| 4 | 179 | 3  | -308.111347239 | 1.53  |
| 4 | 179 | 4  | -308.108911909 | 3.05  |
| 4 | 179 | 5  | -308.105594966 | 5.14  |
| 4 | 178 | -5 | -308.098377855 | 9.67  |
| 4 | 178 | -4 | -308.102539268 | 7.05  |
| 4 | 178 | -3 | -308.106149098 | 4.79  |
| 4 | 178 | -2 | -308.109097157 | 2.94  |
| 4 | 178 | -1 | -308.111336021 | 1.53  |
| 4 | 178 | 0  | -308.112824491 | 0.60  |
| 4 | 178 | 1  | -308.113521268 | 0.16  |
| 4 | 178 | 2  | -308.113396592 | 0.24  |
| 4 | 178 | 3  | -308.112426762 | 0.85  |
| 4 | 178 | 4  | -308.110594779 | 2.00  |
| 4 | 178 | 5  | -308.107893390 | 3.69  |
| 4 | 177 | -5 | -308.095118691 | 11.71 |
| 4 | 177 | -4 | -308.099701637 | 8.83  |
| 4 | 177 | -3 | -308.103709547 | 6.32  |
| 4 | 177 | -2 | -308.107091784 | 4.20  |
| 4 | 177 | -1 | -308.109800979 | 2.50  |
| 4 | 177 | 0  | -308.111788429 | 1.25  |
| 4 | 177 | 1  | -308.113015282 | 0.48  |
| 4 | 177 | 2  | -308.113447111 | 0.21  |
| 4 | 177 | 3  | -308.113054955 | 0.46  |
| 4 | 177 | 4  | -308.111818312 | 1.23  |
| 4 | 177 | 5  | -308.109724128 | 2.55  |
| 4 | 176 | -5 | -308.091649934 | 13.89 |
| 4 | 176 | -4 | -308.096565269 | 10.80 |
| 4 | 176 | -3 | -308.100947153 | 8.05  |
| 4 | 176 | -2 | -308.104740733 | 5.67  |

|   |     |    |                |       |
|---|-----|----|----------------|-------|
| 4 | 176 | -1 | -308.107892995 | 3.69  |
| 4 | 176 | 0  | -308.110358177 | 2.15  |
| 4 | 176 | 1  | -308.112094385 | 1.06  |
| 4 | 176 | 2  | -308.113062965 | 0.45  |
| 4 | 176 | 3  | -308.113237722 | 0.34  |
| 4 | 176 | 4  | -308.112583976 | 0.75  |
| 4 | 176 | 5  | -308.111089634 | 1.69  |
| 4 | 175 | -5 | -308.087926354 | 16.22 |
| 4 | 175 | -4 | -308.093147343 | 12.95 |
| 4 | 175 | -3 | -308.097880142 | 9.98  |
| 4 | 175 | -2 | -308.102057192 | 7.36  |
| 4 | 175 | -1 | -308.105630120 | 5.11  |
| 4 | 175 | 0  | -308.108551836 | 3.28  |
| 4 | 175 | 1  | -308.110777489 | 1.88  |
| 4 | 175 | 2  | -308.112265282 | 0.95  |
| 4 | 175 | 3  | -308.112982242 | 0.50  |
| 4 | 175 | 4  | -308.112898344 | 0.55  |
| 4 | 175 | 5  | -308.111990221 | 1.12  |

---

**Table F.** Rotatory strengths  $R$  calculated at the PCM/B2LYP/6-311++G(2d,2p) level for  $P$ -type conformers of model compounds **4-23** with planar chromophore relative to **4** and substituent contributions  $\Delta R$  for Cotton effects I-III.

| Enone                    | Substituent             | Relative $R$ |       |       | $\Delta R^a$   |                   |                  | $\Delta R^b$ |     |     |
|--------------------------|-------------------------|--------------|-------|-------|----------------|-------------------|------------------|--------------|-----|-----|
|                          |                         | I            | II    | III   | I              | II                | III              | I            | II  | III |
| <b>4</b>                 |                         | 1.00         | 1.00  | 1.00  | 4 <sup>c</sup> | -5.5 <sup>c</sup> | -21 <sup>c</sup> |              |     |     |
| <b>5</b>                 | 3-Me                    | 1.21         | 0.95  | 0.50  | 1              | ca 0              | 10               |              |     |     |
| (4 <i>S</i> )- <b>6</b>  | 4-Me <sub>eq</sub>      | 1.08         | 6.96  | 0.90  | ca 0           | -33               | ca 0             |              |     |     |
| (4 <i>R</i> )- <b>6</b>  | 4-Me <sub>ax</sub>      | 0.50         | -8.02 | 0.98  | -2             | 50                | ca 0             |              |     |     |
| (4 <i>S</i> )- <b>7</b>  | 4-OH <sub>eq</sub>      | 0.99         | 13.14 | -4.13 | ca 0           | -68               | -39              |              |     |     |
| (4 <i>R</i> )- <b>7</b>  | 4-OH <sub>ax</sub>      | -0.10        | -8.52 | 2.86  | -5             | 53                | 38               |              |     |     |
| (5 <i>R</i> )- <b>8</b>  | 5-Me <sub>ax</sub>      | -0.14        | -1.79 | 0.07  | -5             | 16                | 19               |              |     |     |
| (5 <i>S</i> )- <b>8</b>  | 5-Me <sub>eq</sub>      | 0.58         | 1.95  | 1.06  | -2             | -5                | -1               |              |     |     |
| (5 <i>R</i> )- <b>9</b>  | 5-OH <sub>ax</sub>      | 0.36         | 6.90  | -1.45 | -3             | -33               | 51               |              |     |     |
| (5 <i>S</i> )- <b>9</b>  | 5-OH <sub>eq</sub>      | -0.47        | -0.68 | -0.01 | -6             | 9                 | 21               |              |     |     |
| (6 <i>R</i> )- <b>10</b> | 6-Me <sub>eq</sub>      | 0.76         | -0.61 | 0.97  | -1             | 9                 | ca 0             |              |     |     |
| (6 <i>S</i> )- <b>10</b> | 6-Me <sub>ax</sub>      | 0.64         | 4.07  | 0.24  | -1.5           | -17               | 16               |              |     |     |
| (6 <i>R</i> )- <b>11</b> | 6-OH <sub>eq</sub>      | -0.05        | -5.31 | 3.24  | -4             | 35                | -46              |              |     |     |
| (6 <i>S</i> )- <b>11</b> | 6-OH <sub>ax</sub>      | 0.98         | 1.14  | -0.11 | 0              | -1                | 23               |              |     |     |
| (4 <i>S</i> )- <b>12</b> | 3-Me,4-Me <sub>eq</sub> | 1.24         | 4.46  | 0.42  | 1              | -16               | 12               | 1            | -33 | 10  |
| (4 <i>R</i> )- <b>12</b> | 3-Me,4-Me <sub>ax</sub> | 0.81         | -5.99 | 0.32  | -1             | 39                | 14               | -1           | 50  | 10  |
| (4 <i>S</i> )- <b>13</b> | 3-Me,4-OH <sub>eq</sub> | 1.44         | 10.72 | -3.54 | 2              | -54               | 94               | 1            | -68 | -29 |
| (4 <i>R</i> )- <b>13</b> | 3-Me,4-OH <sub>ax</sub> | 0.06         | -5.26 | 1.77  | -4             | 35                | -16              | -4           | 53  | 48  |
| (5 <i>R</i> )- <b>14</b> | 3-Me,5-Me <sub>ax</sub> | -0.07        | 0.75  | 0.41  | -4             | 1                 | 12               | -4           | -16 | 29  |
| (5 <i>S</i> )- <b>14</b> | 3-Me,5-Me <sub>eq</sub> | 0.76         | 1.67  | 0.29  | -1             | -4                | 15               | -1           | -5  | 9   |
| (5 <i>R</i> )- <b>15</b> | 3-Me,5-OH <sub>ax</sub> | 0.32         | 5.18  | -1.30 | -3             | -23               | 48               | -2           | -33 | 61  |
| (5 <i>S</i> )- <b>15</b> | 3-Me,5-OH <sub>eq</sub> | -0.54        | -1.37 | -0.07 | -6             | 13                | 22               | -5           | 9   | 31  |
| (6 <i>R</i> )- <b>16</b> | 3-Me,6-Me <sub>eq</sub> | 0.90         | -0.47 | 0.45  | ca 0           | 8                 | 11               | 0            | 9   | 10  |
| (6 <i>S</i> )- <b>16</b> | 3-Me,6-Me <sub>ax</sub> | 0.56         | 2.90  | 0.19  | -2             | -10               | -17              | -0.5         | -17 | 26  |
| (6 <i>R</i> )- <b>17</b> | 3-Me,4-OH <sub>eq</sub> | -0.28        | -4.67 | 3.21  | -5             | 31                | -46              | -3           | 35  | -36 |
| (6 <i>S</i> )- <b>17</b> | 3-Me,4-OH <sub>ax</sub> | 0.84         | -0.24 | 0.33  | -0.5           | 7                 | 14               | 1            | -1  | 33  |

|                                      |                                        |       |        |       |      |      |      |      |      |      |
|--------------------------------------|----------------------------------------|-------|--------|-------|------|------|------|------|------|------|
| (4 <i>S</i> ,5 <i>R</i> )- <b>18</b> | 4-Me <sub>eq</sub> ,5-Me <sub>eq</sub> | 0.88  | 7.66   | -1.76 | -0.5 | -37  | 57   | -2   | -38  | -1   |
| (4 <i>S</i> ,5 <i>S</i> )- <b>18</b> | 4-Me <sub>eq</sub> ,5-Me <sub>ax</sub> | -0.02 | 2.25   | -0.29 | -4   | -7   | 27   | -5   | -17  | 19   |
| (4 <i>R</i> ,5 <i>S</i> )- <b>18</b> | 4-Me <sub>ax</sub> ,5-Me <sub>ax</sub> | -0.61 | -12.67 | -0.60 | -7   | 76   | 33   | -7   | 66   | 19   |
| (4 <i>R</i> ,5 <i>R</i> )- <b>18</b> | 4-Me <sub>ax</sub> ,5-Me <sub>eq</sub> | 0.01  | -5.81  | -0.81 | -4   | 38   | 37   | -8   | 45   | -1   |
| (4 <i>R</i> ,5 <i>R</i> )- <b>19</b> | 4-OH <sub>eq</sub> ,5-OH <sub>eq</sub> | -0.62 | 9.77   | -3.38 | -7   | -49  | 91   | -6   | -59  | -18  |
| (4 <i>R</i> ,5 <i>S</i> )- <b>19</b> | 4-OH <sub>eq</sub> ,5-OH <sub>ax</sub> | 0.28  | 19.39  | -5.45 | -3   | -103 | 134  | -3   | -101 | 12   |
| (4 <i>S</i> ,5 <i>S</i> )- <b>19</b> | 4-OH <sub>ax</sub> ,5-OH <sub>ax</sub> | -1.10 | -18.84 | 4.76  | -9   | 111  | -78  | -8   | 20   | 89   |
| (4 <i>S</i> ,5 <i>R</i> )- <b>19</b> | 4-OH <sub>ax</sub> ,5-OH <sub>eq</sub> | -1.53 | -12.71 | 1.95  | -11  | 76   | -20  | -11  | 62   | 59   |
| (4 <i>S</i> ,6 <i>S</i> )- <b>20</b> | 4-Me <sub>eq</sub> ,6-Me <sub>ax</sub> | 0.66  | 10.03  | -1.32 | -1.5 | -50  | 48   | -1.5 | -50  | 16   |
| (4 <i>S</i> ,6 <i>R</i> )- <b>20</b> | 4-Me <sub>eq</sub> ,6-Me <sub>eq</sub> | 0.86  | 4.81   | 0.52  | -1   | -21  | 10   | -1   | -24  | ca 0 |
| (4 <i>R</i> ,6 <i>R</i> )- <b>20</b> | 4-Me <sub>ax</sub> ,6-Me <sub>eq</sub> | 0.26  | -10.69 | 0.78  | -3   | 65   | 4    | -3   | 33   | 16   |
| (4 <i>R</i> ,6 <i>S</i> )- <b>20</b> | 4-Me <sub>ax</sub> ,6-Me <sub>ax</sub> | 0.51  | -5.68  | -0.21 | -2   | 37   | 25   | -3   | 59   | ca 0 |
| (4 <i>S</i> ,6 <i>S</i> )- <b>21</b> | 4-OH <sub>eq</sub> ,6-OH <sub>ax</sub> | 0.69  | 10.95  | -3.84 | -1   | -55  | 100  | ca 0 | -69  | -16  |
| (4 <i>S</i> ,6 <i>R</i> )- <b>21</b> | 4-OH <sub>eq</sub> ,6-OH <sub>eq</sub> | 0.72  | 9.87   | -1.77 | -1   | -50  | 61   | -4   | -33  | -85  |
| (4 <i>R</i> ,6 <i>R</i> )- <b>21</b> | 4-OH <sub>ax</sub> ,6-OH <sub>eq</sub> | -0.27 | -10.66 | 3.13  | -5   | 65   | -44  | -5   | 52   | 61   |
| (4 <i>R</i> ,6 <i>S</i> )- <b>21</b> | 4-OH <sub>ax</sub> ,6-OH <sub>ax</sub> | 0.28  | -8.34  | 2.47  | -3   | 52   | -31  | -9   | 88   | -8   |
| (5 <i>S</i> ,6 <i>R</i> )- <b>22</b> | 5-Me <sub>eq</sub> ,6-Me <sub>eq</sub> | 0.57  | -0.22  | 0.79  | -2   | 7    | 4    | -6   | -1   | 35   |
| (5 <i>S</i> ,6 <i>S</i> )- <b>22</b> | 5-Me <sub>eq</sub> ,6-Me <sub>ax</sub> | 0.80  | 5.13   | 0.45  | -1   | -23  | 11   | -6   | 25   | 19   |
| (5 <i>R</i> ,6 <i>S</i> )- <b>22</b> | 5-Me <sub>ax</sub> ,6-Me <sub>ax</sub> | -0.32 | 2.50   | -0.25 | -5   | -8   | 26   | -3   | 4    | -1   |
| (5 <i>R</i> ,6 <i>R</i> )- <b>22</b> | 5-Me <sub>ax</sub> ,6-Me <sub>eq</sub> | 0.05  | 0.61   | -0.16 | -4   | 2    | 24   | -3.5 | -1   | 35   |
| (5 <i>S</i> ,6 <i>R</i> )- <b>23</b> | 5-OH <sub>eq</sub> ,6-OH <sub>eq</sub> | -1.27 | -7.51  | 2.81  | -10  | 47   | -38  | -3   | -34  | 74   |
| (5 <i>S</i> ,6 <i>S</i> )- <b>23</b> | 5-OH <sub>eq</sub> ,6-OH <sub>ax</sub> | -0.53 | -1.24  | 0.24  | -6   | 12   | -16  | -7   | 2    | 5    |
| (5 <i>R</i> ,6 <i>S</i> )- <b>23</b> | 5-OH <sub>ax</sub> ,6-OH <sub>ax</sub> | 0.16  | 5.47   | -1.01 | -3.5 | -25  | 42   | -10  | 44   | -25  |
| (5 <i>R</i> ,6 <i>R</i> )- <b>23</b> | 5-OH <sub>ax</sub> ,6-OH <sub>eq</sub> | -0.35 | 0.96   | 1.01  | -6   | ca 0 | ca 0 | -6   | 8    | 44   |

[a] obtained by subtraction of *R* for **4** from that for molecules **5-23**; [b] obtained by adding contributions  $\Delta R^a$  for individual substituents; [c] actual calculated *R* for **4**.

**Table G.** Specific optical rotations for enones **6-11**, measured and calculated at the PCM/B3LYP/Aug-cc-pVTZ level.

| Enone                    | Conformer                                         | Calculated optical rotations                      |           |           |           | Measured optical rotations |                   |           |           |
|--------------------------|---------------------------------------------------|---------------------------------------------------|-----------|-----------|-----------|----------------------------|-------------------|-----------|-----------|
|                          |                                                   | 589<br>nm                                         | 578<br>nm | 546<br>nm | 436<br>nm | 589<br>nm                  | 578<br>nm         | 546<br>nm | 436<br>nm |
| (4 <i>S</i> )- <b>6</b>  | ( <i>P</i> )                                      | -90                                               | -191      | -218      | -359      |                            |                   |           |           |
|                          | ( <i>M</i> )                                      | -322                                              | -430      | -497      | -911      |                            |                   |           |           |
|                          | <b><math>\Delta E^a</math> Boltzmann averaged</b> | -148                                              | -251      | -288      | -497      | 123 <sup>b</sup>           |                   |           |           |
| (4 <i>S</i> )- <b>7</b>  | ( <i>P1</i> )                                     | -191                                              | -244      | -282      | -512      |                            |                   |           |           |
|                          | ( <i>P2</i> )                                     | -199                                              | -237      | -269      | -432      |                            |                   |           |           |
|                          | ( <i>P3</i> )                                     | -71                                               | -78       | -86       | -84       |                            |                   |           |           |
|                          | ( <i>M1</i> )                                     | -221                                              | -204      | -277      | -286      |                            |                   |           |           |
|                          | ( <i>M2</i> )                                     | -36                                               | -5        | +4        | +190      |                            |                   |           |           |
|                          | ( <i>M3</i> )                                     | -186                                              | -236      | -272      | -490      |                            |                   |           |           |
|                          |                                                   | <b><math>\Delta E^a</math> Boltzmann averaged</b> | -153      | -182      | -209      | -326                       | -110 <sup>c</sup> |           |           |
| (5 <i>R</i> )- <b>8</b>  | ( <i>P</i> )                                      | -51                                               | -147      | -175      | -403      |                            |                   |           |           |
|                          | ( <i>M</i> )                                      | -87                                               | -53       | -60       | -104      |                            |                   |           |           |
|                          | <b><math>\Delta E^a</math> Boltzmann averaged</b> | -148                                              | -251      | -288      | -497      | -95 <sup>d</sup>           |                   |           |           |
| (5 <i>R</i> )- <b>9</b>  | ( <i>P1</i> )                                     | -201                                              | -291      | -344      | -753      |                            |                   |           |           |
|                          | ( <i>P2</i> )                                     | -182                                              | -245      | -285      | -553      |                            |                   |           |           |
|                          | ( <i>P3</i> )                                     | -6                                                | -87       | -109      | -331      |                            |                   |           |           |
|                          | ( <i>M1</i> )                                     | -33                                               | +49       | +64       | +231      |                            |                   |           |           |
|                          | ( <i>M2</i> )                                     | -72                                               | -57       | -65       | -122      |                            |                   |           |           |
|                          | ( <i>M3</i> )                                     | +21                                               | +90       | +110      | +305      |                            |                   |           |           |
|                          |                                                   | <b><math>\Delta E^a</math> Boltzmann averaged</b> | -50       | -40       | -45       | -66                        | -48 <sup>e</sup>  |           |           |
| (6 <i>R</i> )- <b>10</b> | ( <i>P</i> )                                      | 159                                               | 159       | 181       | 286       |                            |                   |           |           |
|                          | ( <i>M</i> )                                      | -137                                              | -64       | -78       | -219      |                            |                   |           |           |
|                          | <b><math>\Delta E^a</math> Boltzmann averaged</b> | 52                                                | 78        | 88        | 104       | 91 <sup>f</sup>            |                   |           |           |
| (6 <i>R</i> )- <b>11</b> | ( <i>P1</i> )                                     | 196                                               | 151       | 169       | 221       |                            |                   |           |           |
|                          | ( <i>P2</i> )                                     | 104                                               | 59        | 64        | 52        |                            |                   |           |           |
|                          | ( <i>M1</i> )                                     | -64                                               | -29       | -38       | -140      |                            |                   |           |           |
|                          | <b><math>\Delta E^a</math> Boltzmann averaged</b> | 182                                               | 140       | 156       | 200       | n.a                        |                   |           |           |

[a] optimized at PCM/MP2/Aug-cc-pVTZ//PCM/B3LYP/6-311++G(2d,2p) level; [b] measured for (4*R*)-**6** in ethanol, K. Mori, T. Shozo, *Tetrahedron*, **1985**, *41*, 3049; [c] in CHCl<sub>3</sub>, J. E. Audia, L. Boisvert, A. D. Patten, A. Villalobos, S. J. Danishefsky, *J. Org. Chem.* **1989**, *54*, 3738; [d] in CHCl<sub>3</sub>, D. A. Lightner, T. D. Bouman, J. K. Gawroński, K. Gawrońska, J. L. Chappuis, B. V. Crist, A. E. Hansen, *J. Am. Chem. Soc.* **1981**, *103*, 5314; [e] in CHCl<sub>3</sub>, P. Bolze, G. Dickmeiss, K. A. Jørgensen, *Org. Lett.* **2008**, *10*, 3753. [f] in methanol, H. Iio, M. Monden, K. Okada, T. Tokoroyama, *Chem. Commun.* **1987**, 358.



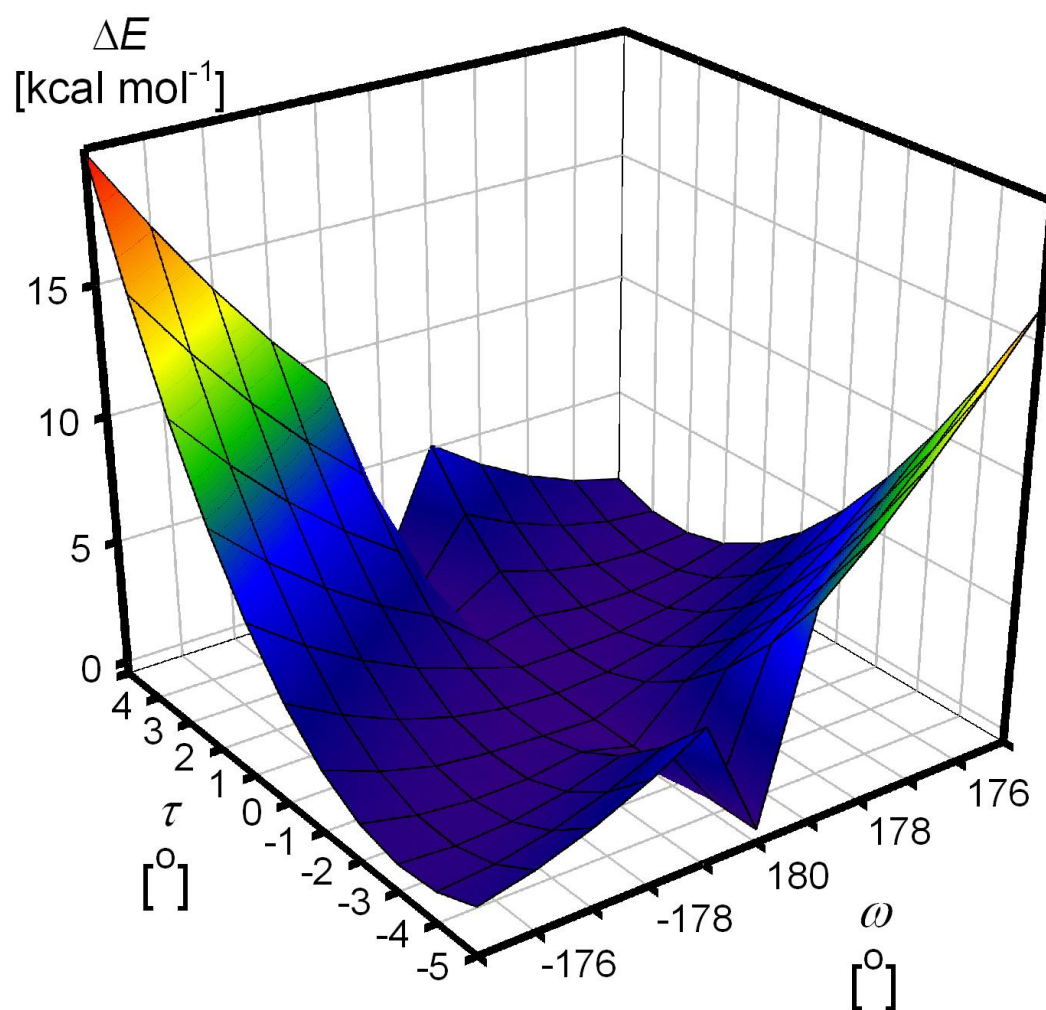

**Figure A.** Relative energies of (*P*)-4 (in  $\text{kcal mol}^{-1}$ , calculated at the B3LYP/6-311++G(2d,2p) level) as a function of dihedral angles  $\omega$  and  $\tau$ .

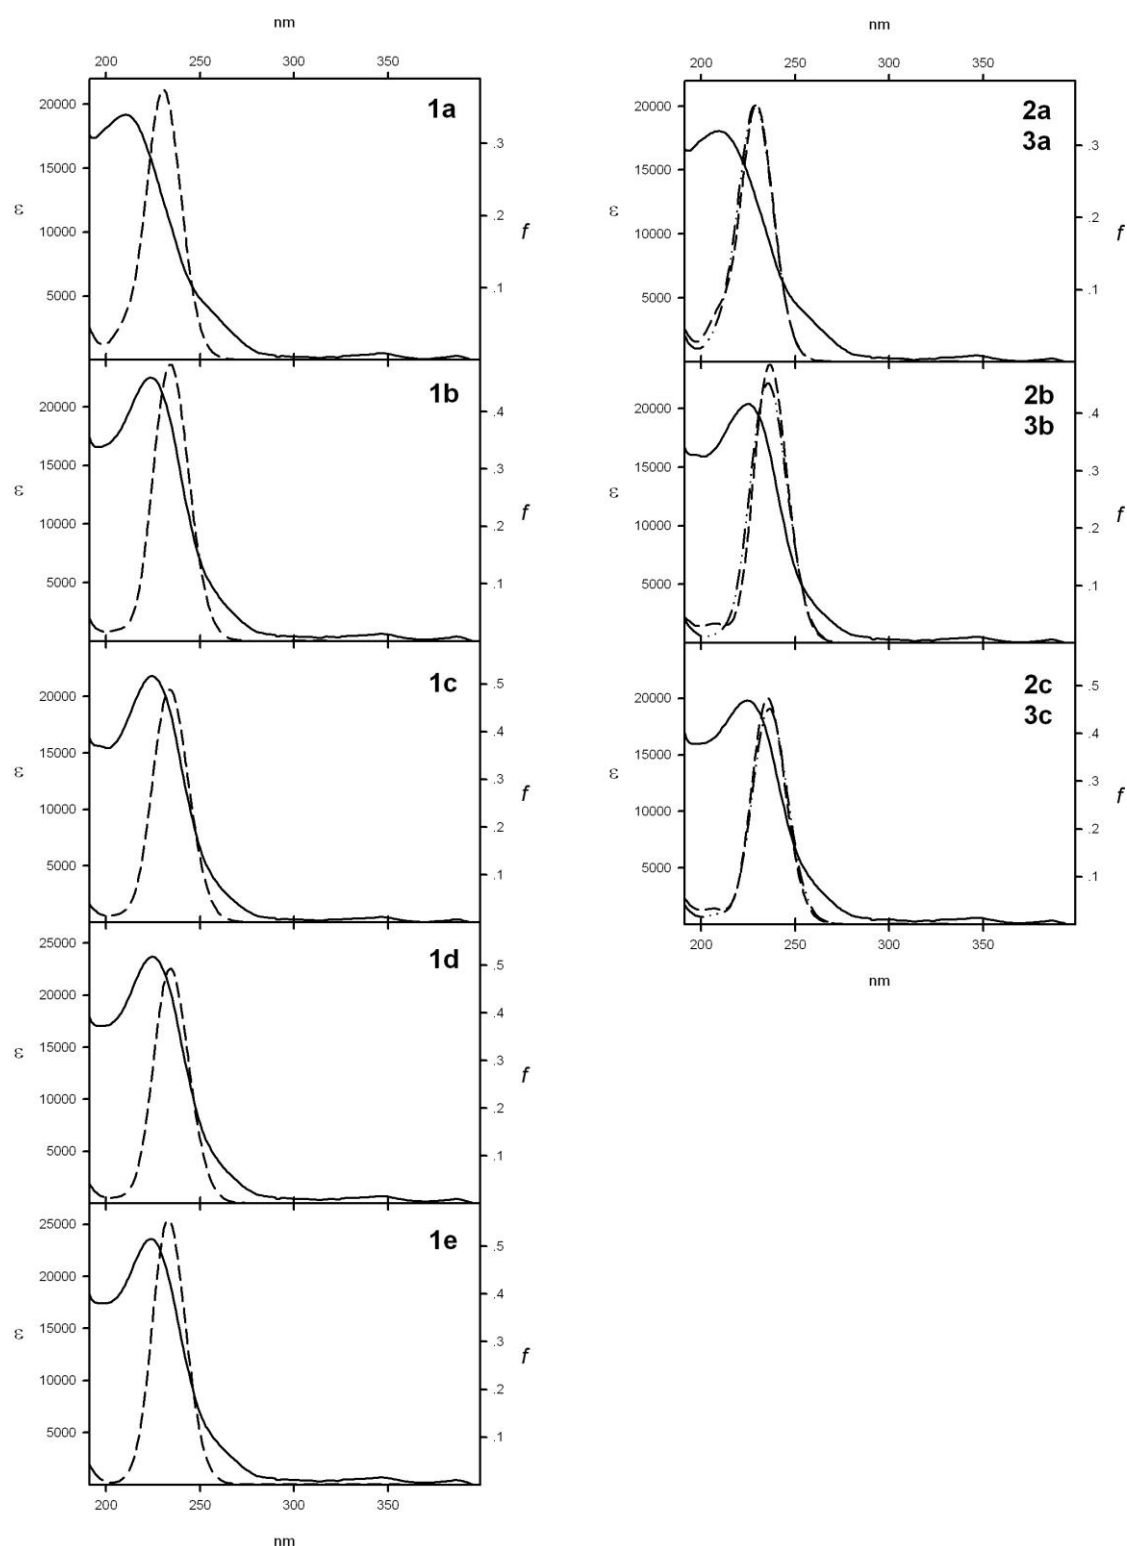

**Figure B.** UV spectra of *cis*-ketodiols **1a-1e**, experimental (in acetonitrile solutions, solid lines) and  $\Delta E_{MP2}$  Boltzmann averaged calculated at PCM/B2LYP/Aug-cc-pVTZ level (dashed lines) (left column) and UV spectra of *cis*-ketodiols *ent*-**2a-2c** experimental (in acetonitrile solutions, solid lines),  $\Delta E_{MP2}$  Boltzmann averaged calculated at PCM/B2LYP/Aug-cc-pVTZ level for **2a-2c** (dashed lines) and **3a-3c** (dash-dot-dot lines) (right column). All calculated spectra were wavelength corrected to match experimental short-wavelength UV  $\lambda_{max}$  at ca. 220 nm.

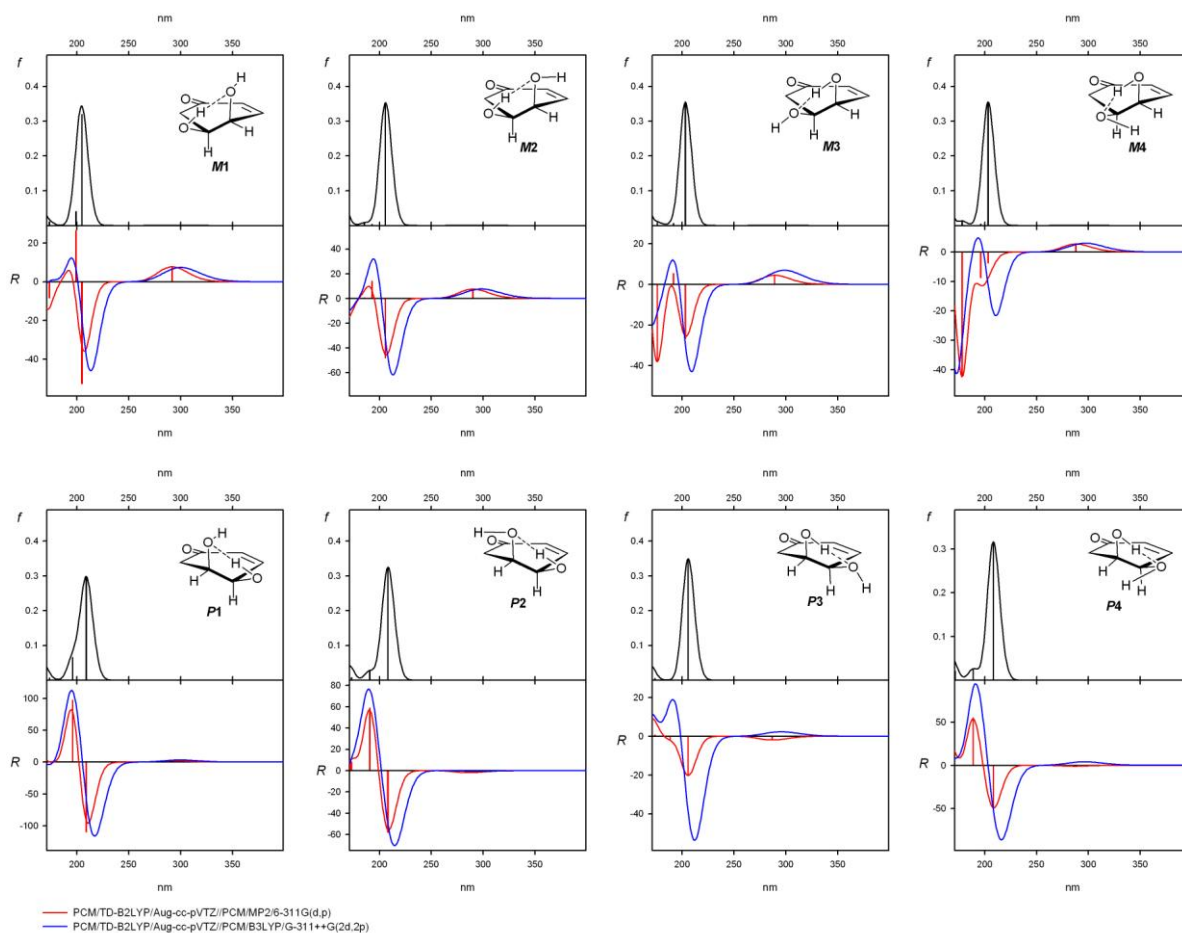

**Figure B1.** ECD spectra calculated at the PCM/B2LYP/Aug-cc-pVTZ level for individual conformers of **1a**, optimized at the PCM/MP2/6-311G(d,p) level (red lines) and at the PCM/B3LYP/6-311++G(2d,2p) level (blue lines).

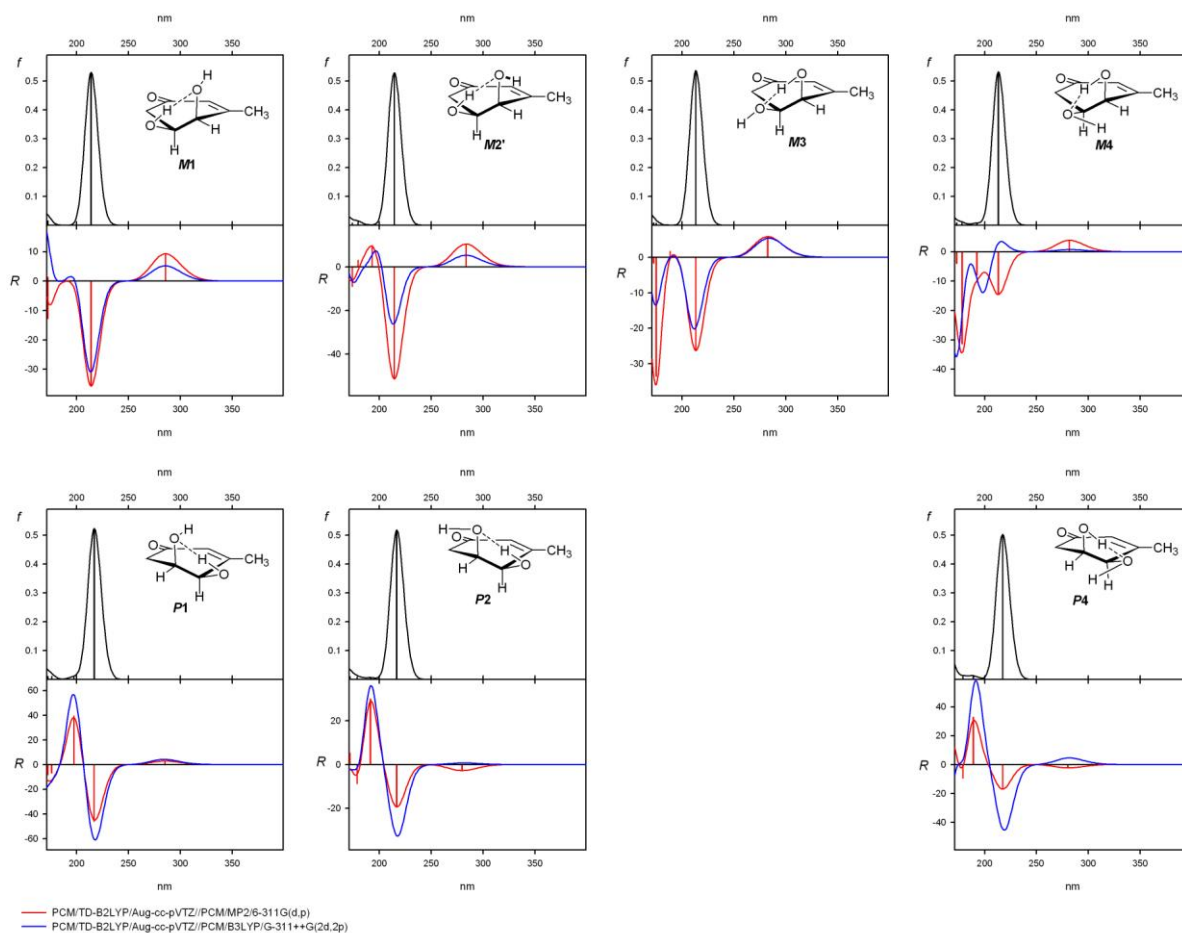

**Figure B2.** ECD spectra calculated at the PCM/B2LYP/Aug-cc-pVTZ level for individual conformers of **1b**, optimized at the PCM/MP2/6-311G(d,p) level (red lines) and at the PCM/B3LYP/6-311++G(2d,2p) level (blue lines).

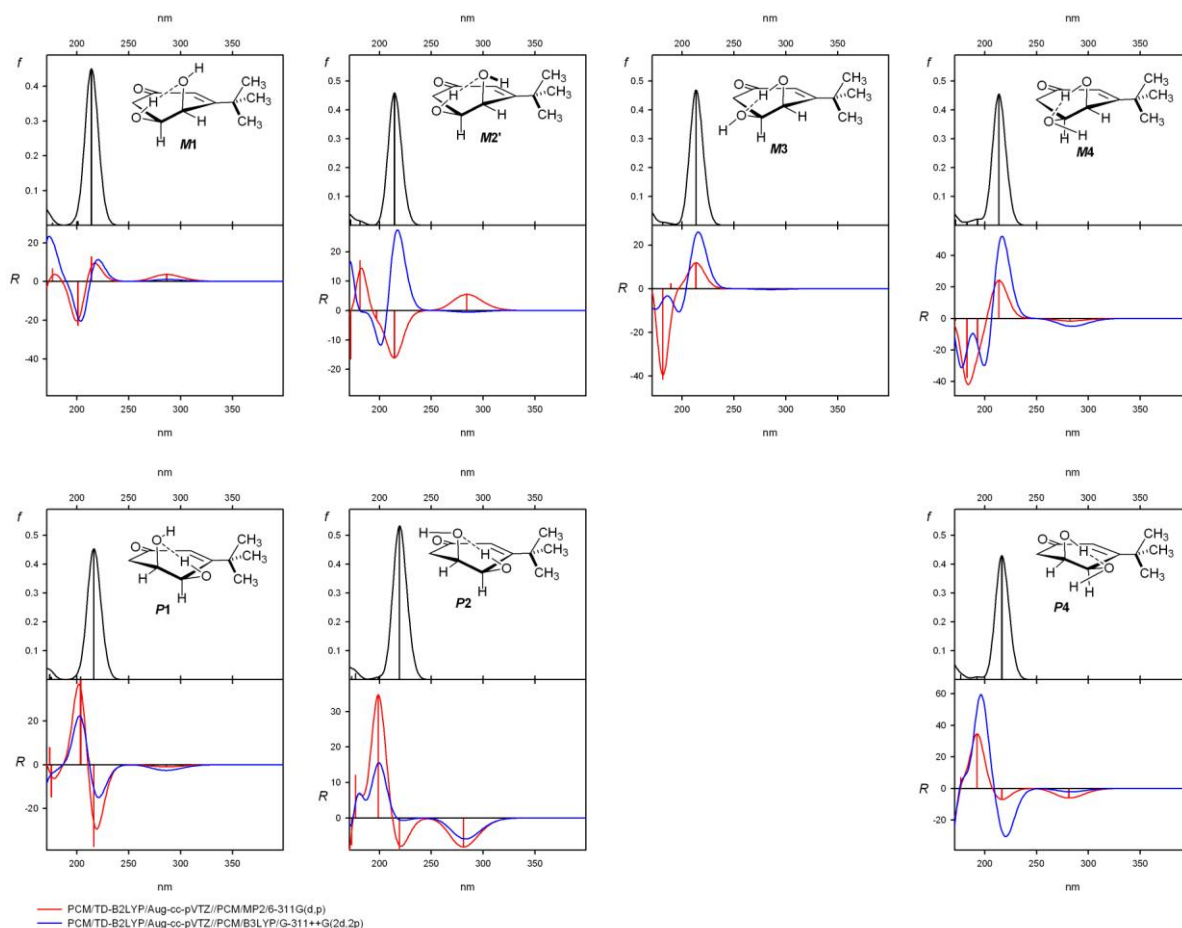

**Figure B3.** ECD spectra calculated at the PCM/B2LYP/Aug-cc-pVTZ level for individual conformers of **1c**, optimized at the PCM/MP2/6-311G(d,p) level (red lines) and at the PCM/B3LYP/6-311++G(2d,2p) level (blue lines).

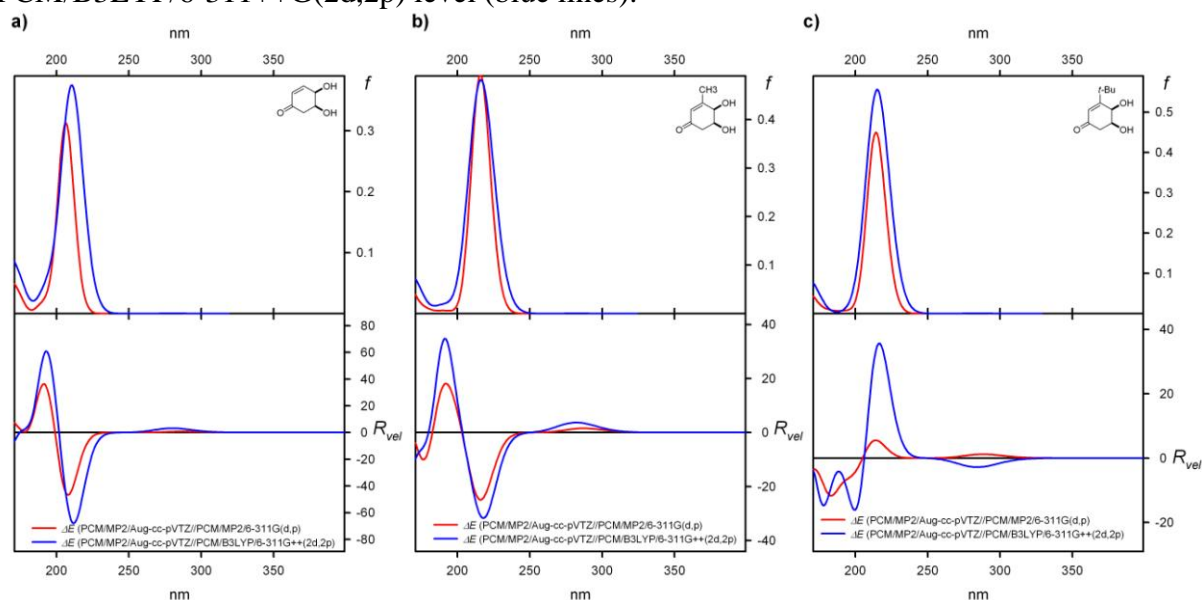

**Figure B4.** ECD spectra of *cis*-ketodiols **1a** (a), **1b** (b) and **1e** (c) calculated at the PCM/B2LYP/Aug-cc-pVTZ level and  $\Delta E_{MP2}$  Boltzmann averaged. Geometries were optimized at the PCM/MP2/Aug-cc-pVTZ//PCM/MP2/6-311G(d,p) level (red lines) and at the PCM/MP2/Aug-cc-pVTZ//PCM/B3LYP/6-311++G(2d,2p) level (blue lines). Wavelength not corrected.

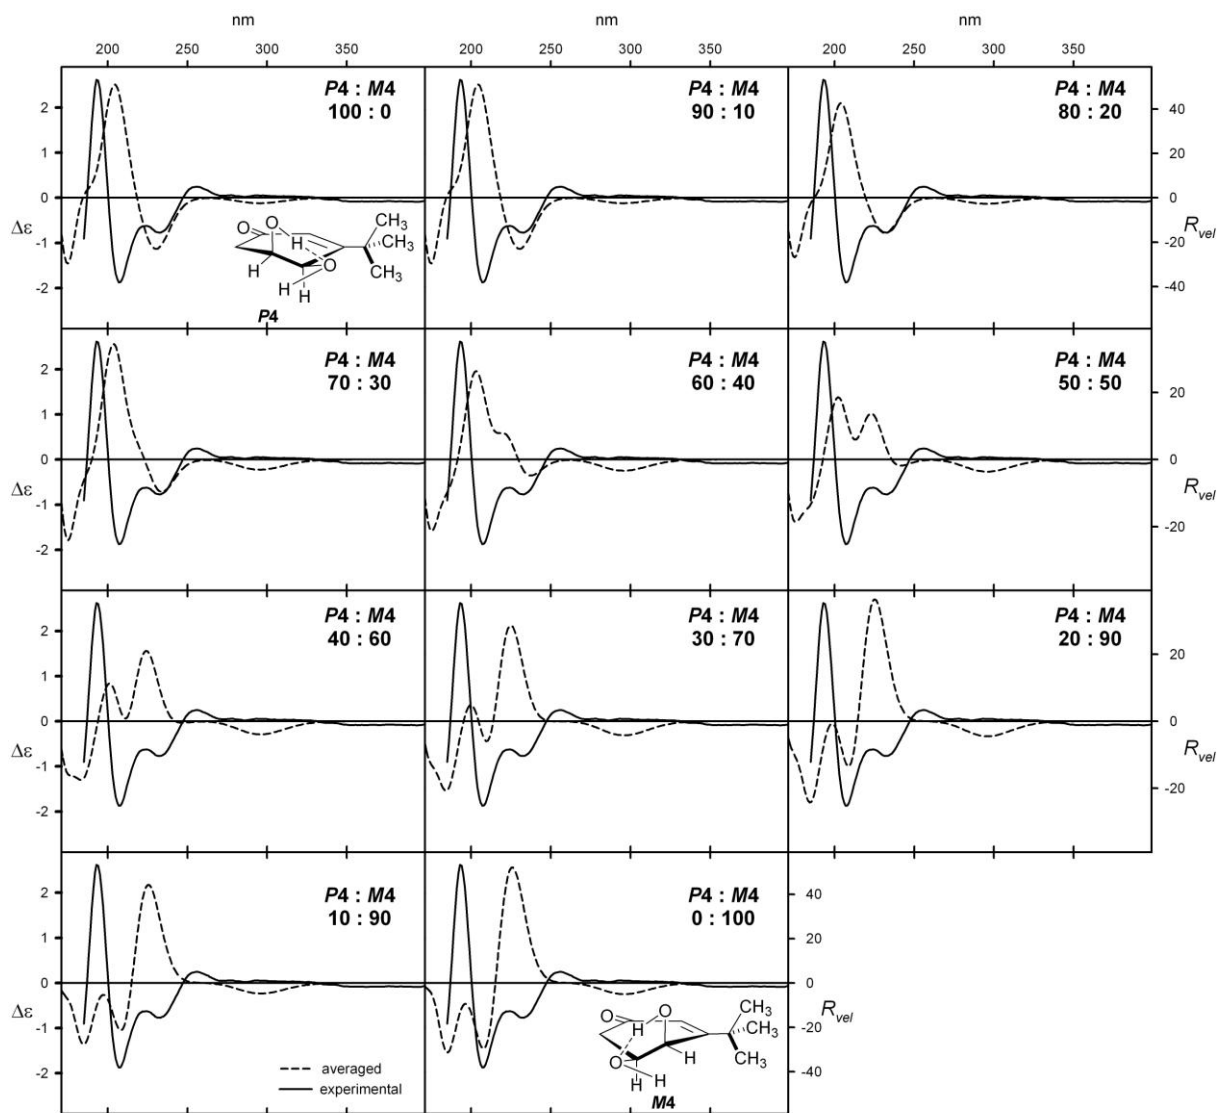

**Figure C.** Effect of percentage populations of the lowest-energy *P* and *M* conformers on averaged ECD spectra of **1e**. ECD spectra were calculated at PCM/B2LYP/Aug-cc-pVTZ level.

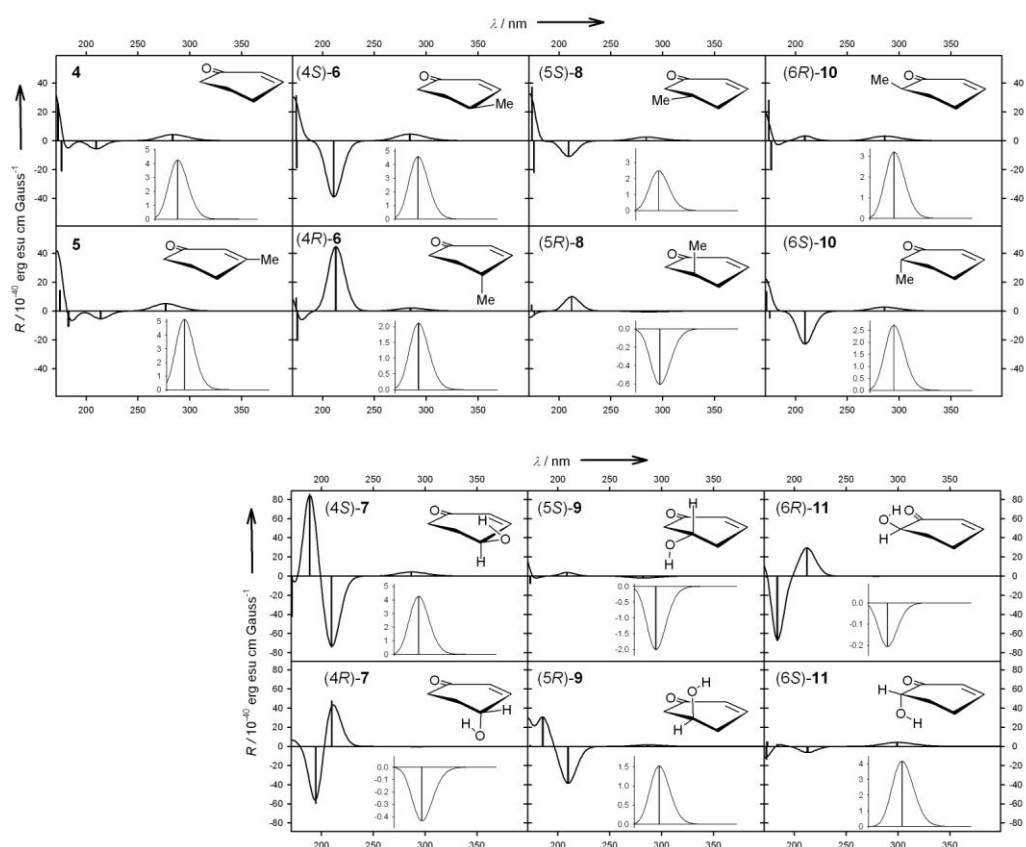

**Figure D.** Effect of methyl and hydroxy substituents on the ECD spectra of selected monosubstituted (*P*)-2-cyclohexenones with a planar chromophore ( $\omega = 180^\circ$ ,  $\tau = 0^\circ$ ). All spectra were calculated at the PCM/B2LYP/Aug-cc-pVTZ level for the structures optimized at the PCM/B3LYP/6-311++G(2d,2p) level. Inserts show long wavelength (ca. 300 nm)  $n_{C=O} - \pi_{C=O}^*$  Cotton effects. Wavelength not corrected.

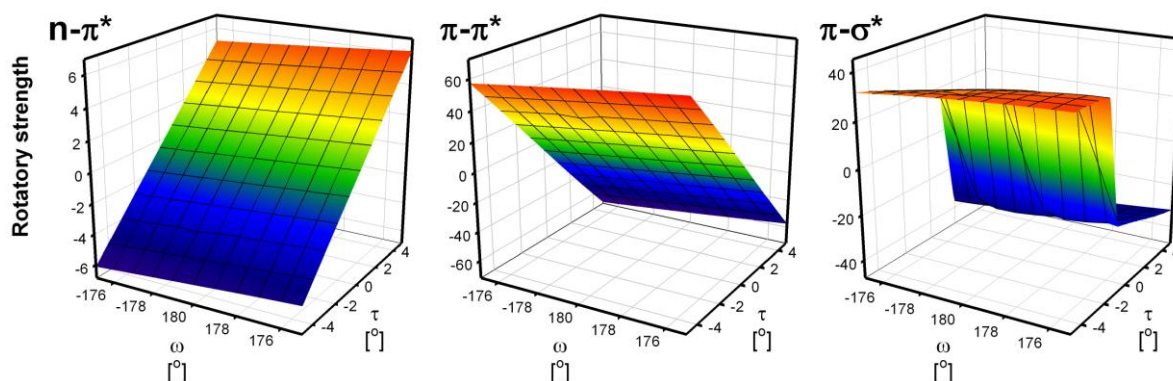

**Figure E.** Effect of non-planarity of the chromophore ( $\omega$  and  $\tau$  angles) on the rotatory strengths  $R$  for the three low-energy electronic transitions, calculated conformers of acrolein. All rotatory strengths were calculated at the PCM/B2LYP/6-311++G(2d,2p) level.



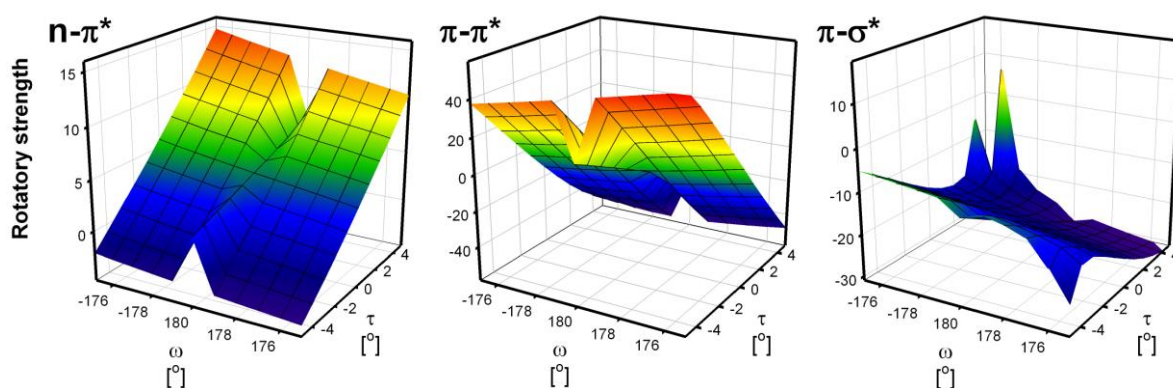

**Figure F.** Effect of non-planarity of the chromophore ( $\omega$  and  $\tau$  angles) on the rotatory strengths  $R$  for the three low-energy electronic transitions, calculated for  $P$ -type conformers of **4**. All rotatory strengths were calculated at the PCM/B2LYP/6-311++G(2d,2p) level.

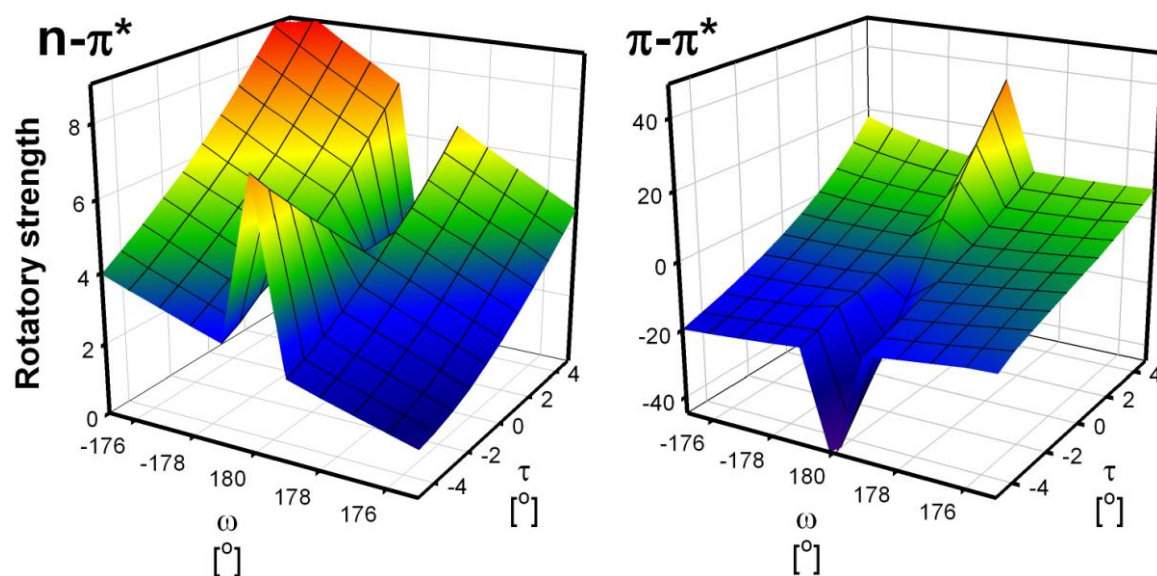

**Figure G.** Calculated contribution of the C4-C5-C6 chain to the rotatory strengths of 2-cyclohexenone obtained by subtraction of rotatory strengths calculated for acrolein (Figure D) from those obtained for **4** (Figure E). All rotatory strengths were calculated at the PCM/B2LYP/6-311++G(2d,2p) level.



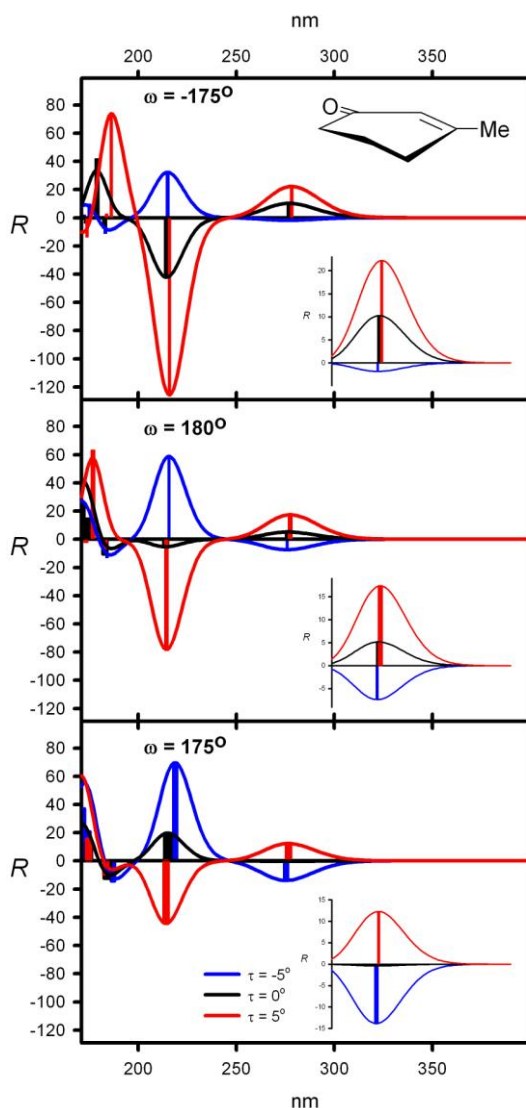

**Figure H.** Effect of the twist of  $\omega$  and  $\tau$  angles on the ECD spectra of *P*-type conformer of **5** calculated at PCM/B2LYP/6-311++G(2d,2p) level. Vertical bars represent rotatory strengths. Wavelength not corrected.

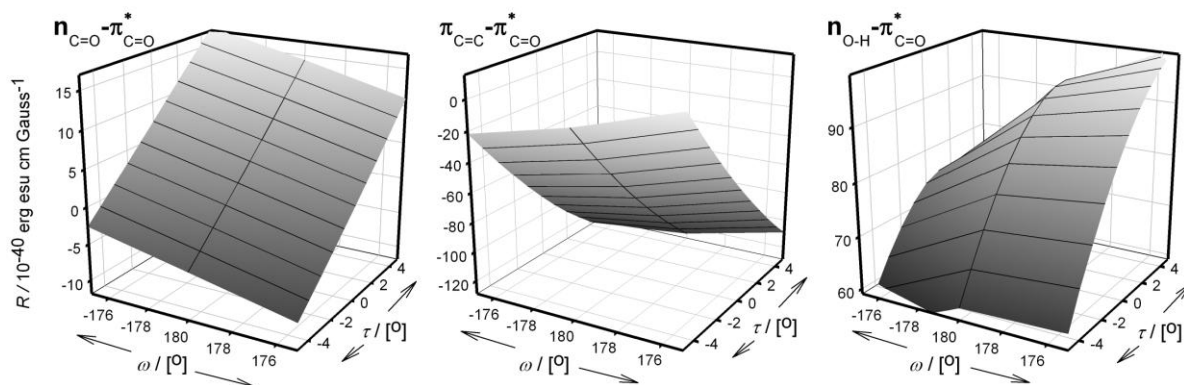

**Figure I.** Effect of deviation from planarity (angles  $\omega$  and  $\tau$ ) on the rotatory strengths  $R$  for the three low-energy electronic transitions, calculated for *P*-type conformers of (4*S*)-**7**. All rotatory strengths were calculated at the PCM/B2LYP/6-311++G(2d,2p) level.

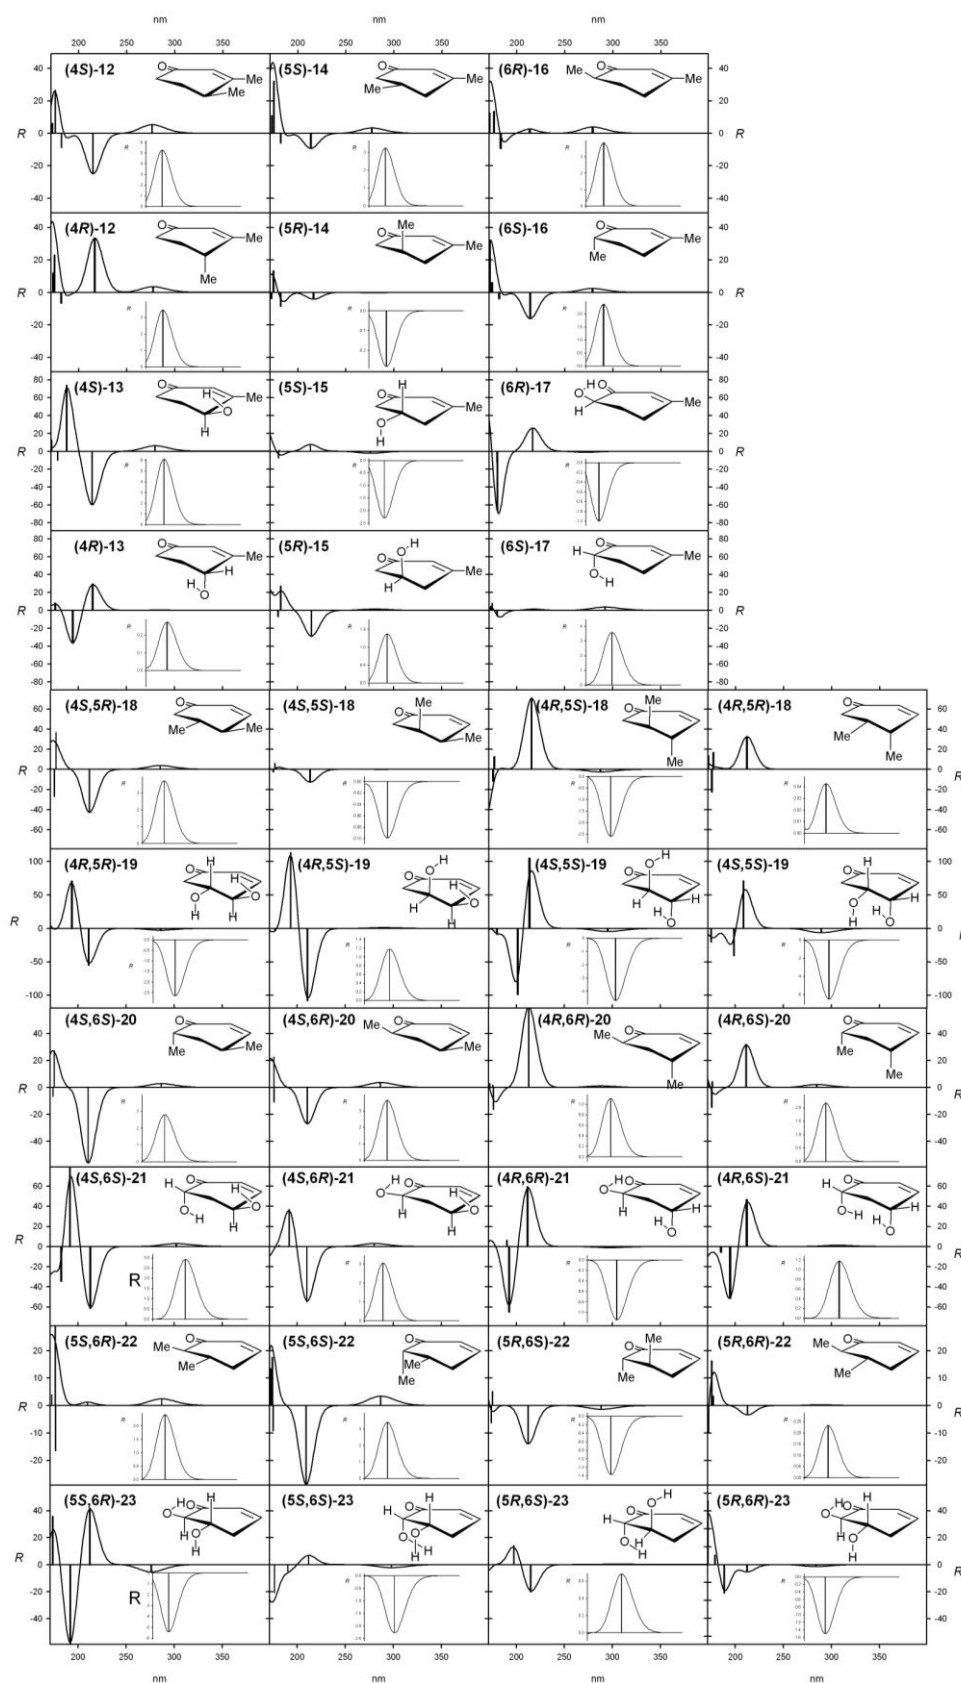

**Figure J.** Effect of methyl and hydroxy substituents on the ECD spectra of selected disubstituted 2-cyclohexenone  $P$ -type conformers with planar chromophore moieties. All spectra were calculated at the PCM/B2LYP/6-311++G(2d,2p) level. Inserts show the long wavelength ( $\text{ca. } 300 \text{ nm}$ )  $n\text{-}\pi^*$  Cotton effects. Wavelength not corrected.

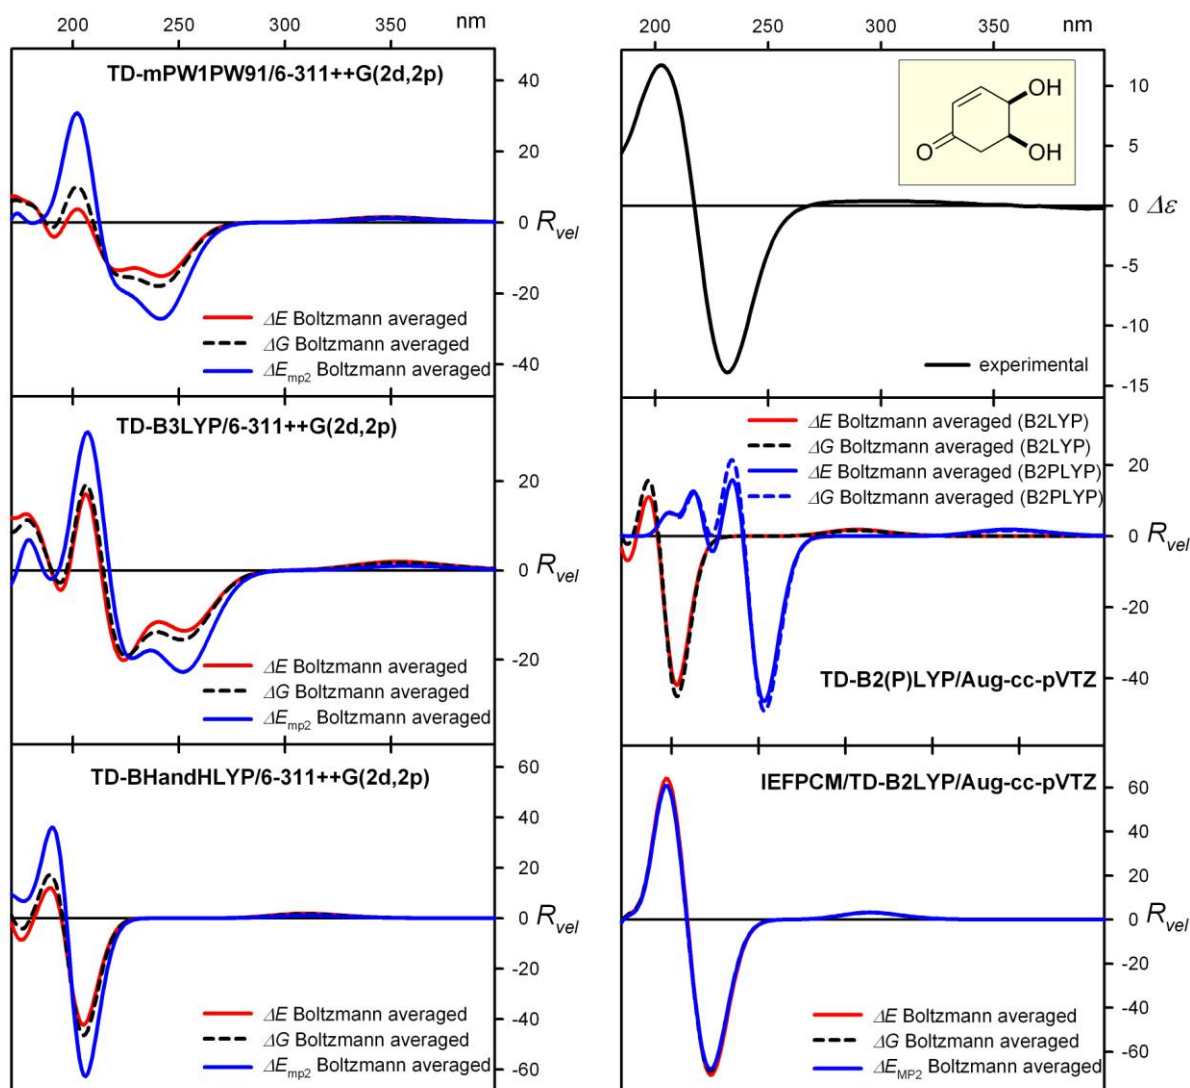

**Figure K.** Effect of methods used for calculations of ECD and for Boltzmann averaging on the shapes of the ECD spectra of **1a**.
